# Supplementary material for: Proteomics and C9orf72 neuropathology identify ribosomes as poly-GR/PR interactors driving toxicity
Source: PubMed Central journal article supplement (PMC6238541; doi:10.26508/lsa.201800070), 2018-05-16
Supplement: LSA-2018-00070_SdataF1.pdf [file LSA-2018-00070_SdataF1.pdf]

SOURCE DATA for Fig. 4B

*G3BP2, CTRL*

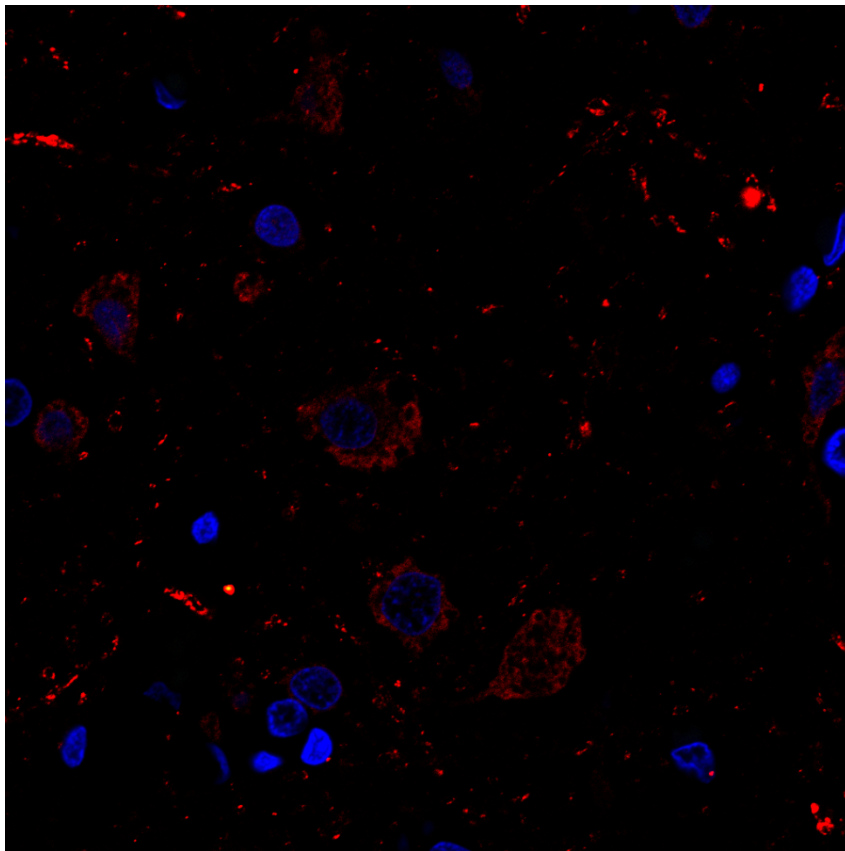

*G3BP2, C9orf72*

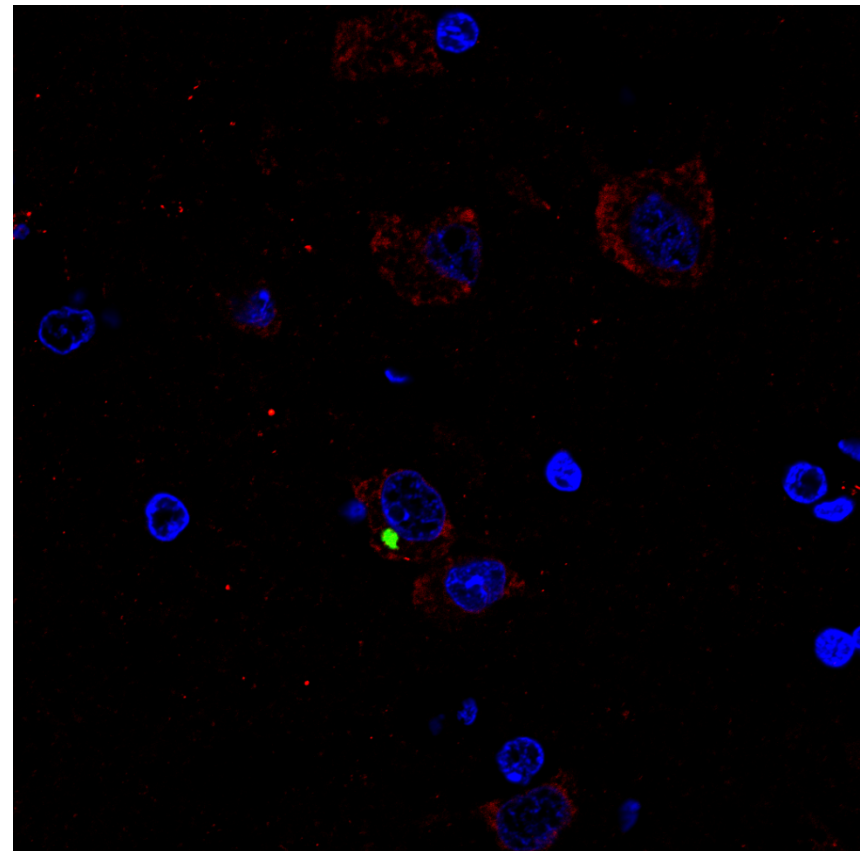

*G3BP2, DAPI, GR*

SOURCE DATA for Fig. 4B

*TIAR, CTRL*

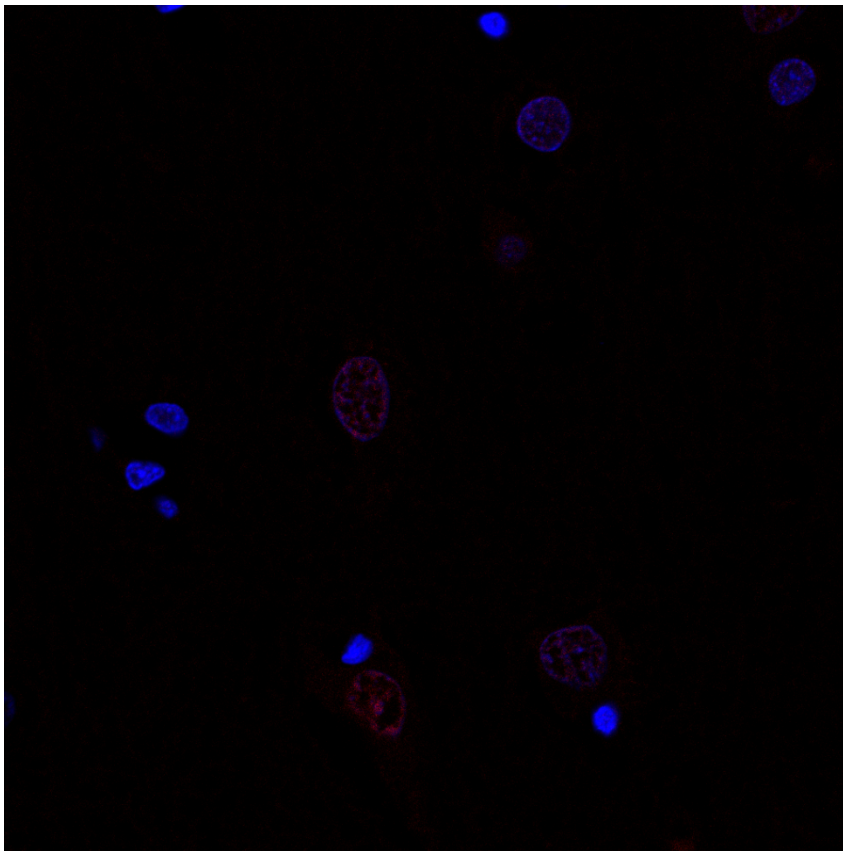

*TIAR, C9orf72*

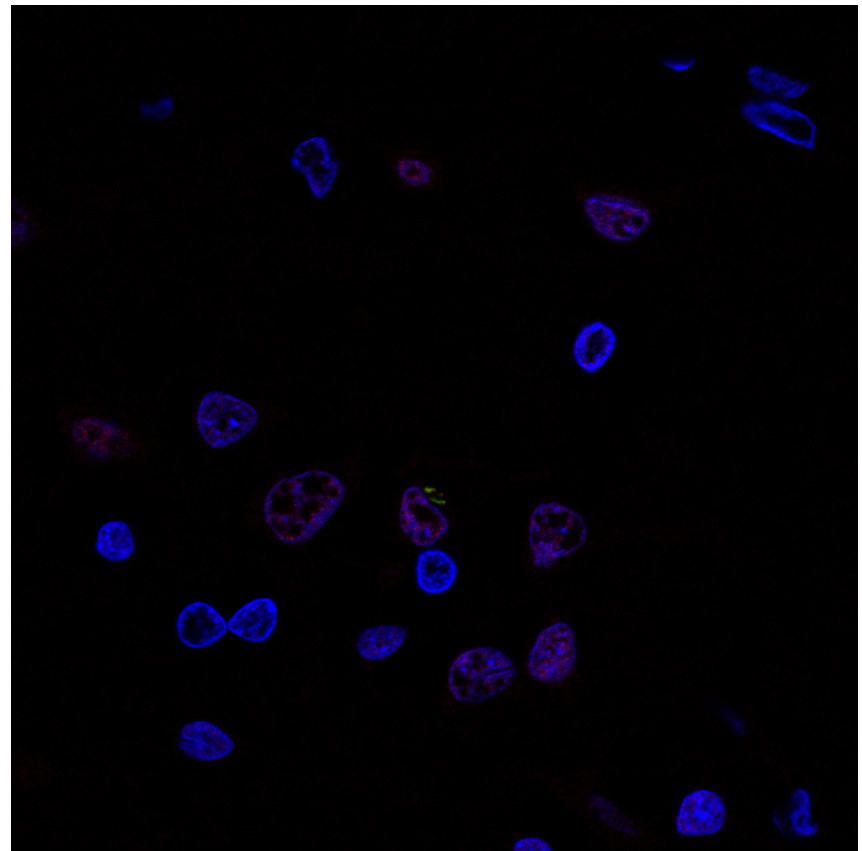

*TIAR, DAPI, GR*

SOURCE DATA for Fig. 4B

*YBX1, CTRL*

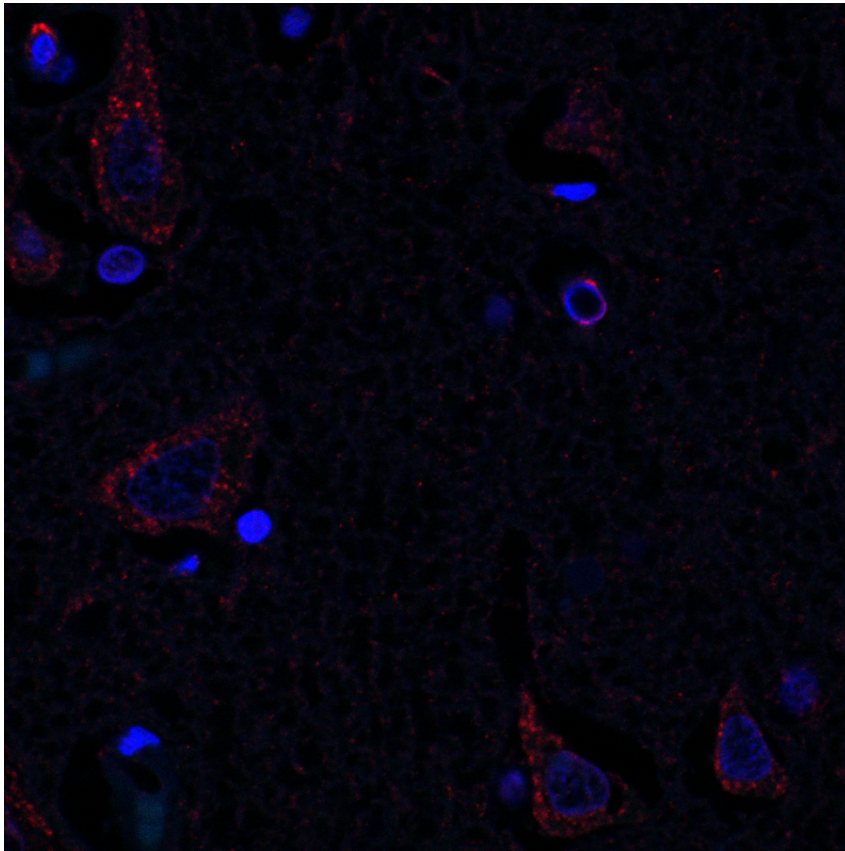

*YBX1, C9orf72*

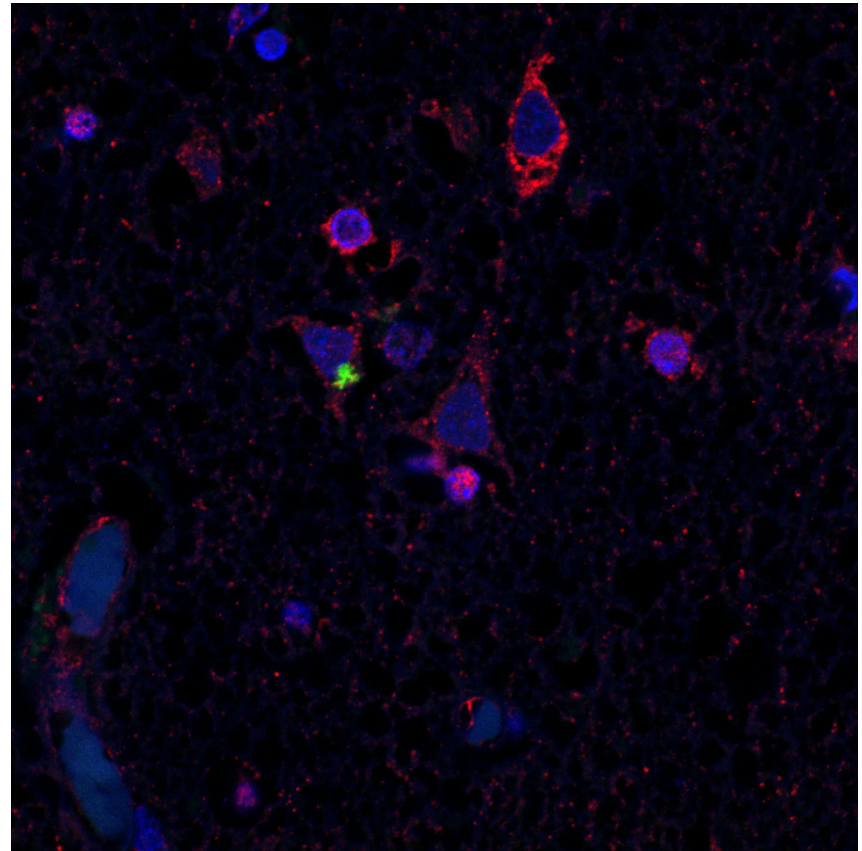

*YBX1, DAPI, GR*

SOURCE DATA for Fig. 4B

*STAU2, CTRL*

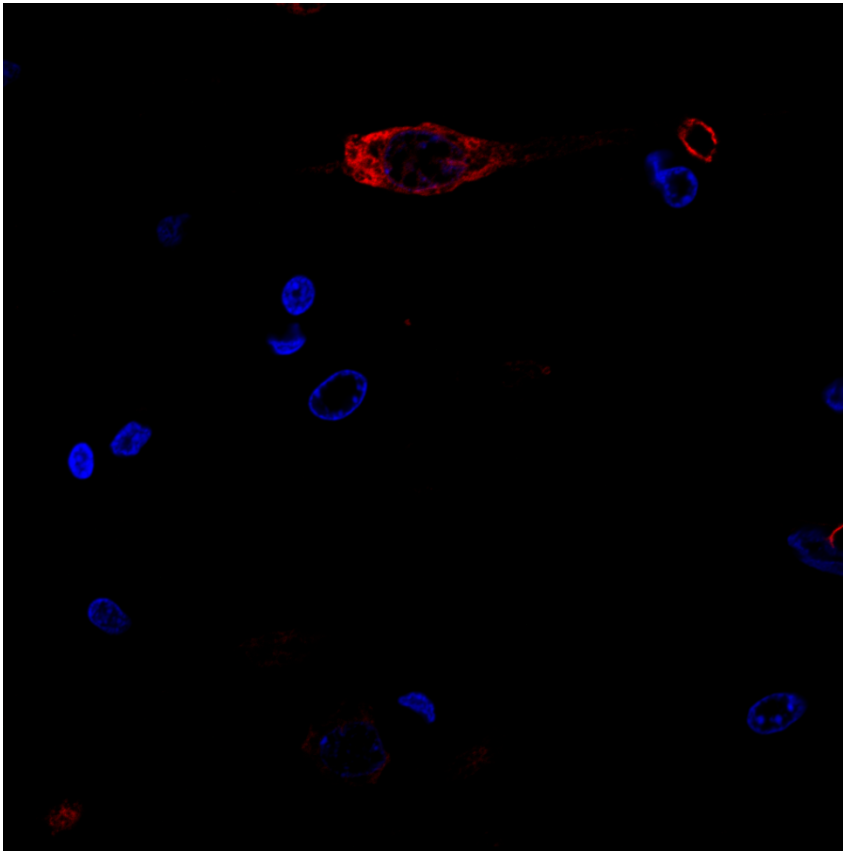

*STAU2, C9orf72*

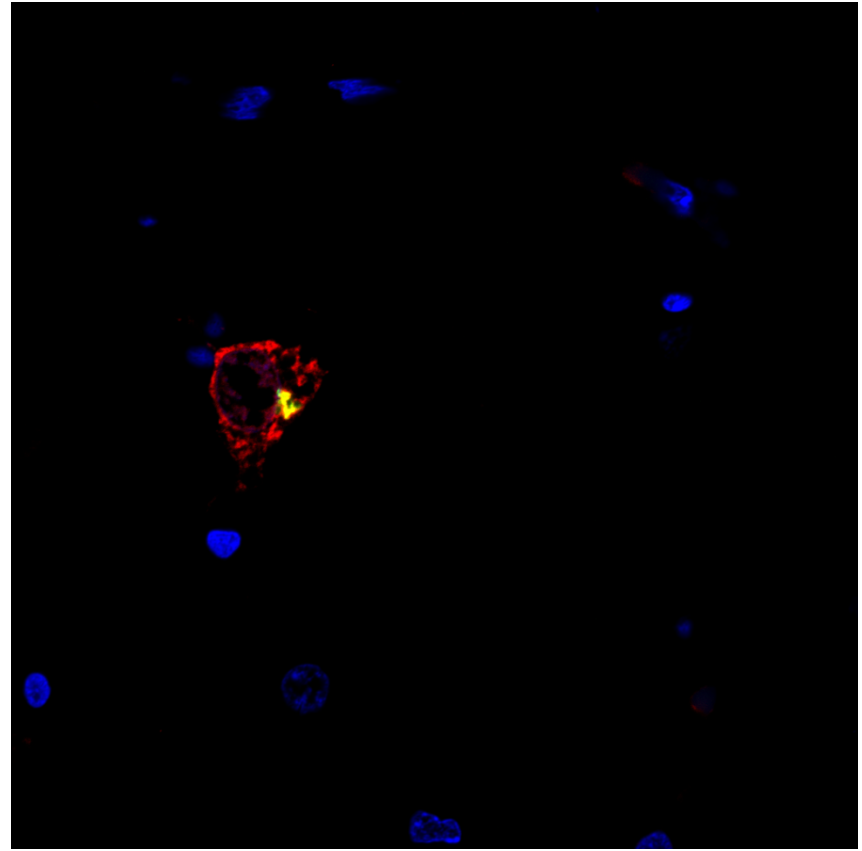

*STAU2, DAPI, GR*
