# Supplementary material for: Proteomics and C9orf72 neuropathology identify ribosomes as poly-GR/PR interactors driving toxicity
Source: Life Sci Alliance. 2018 May 16;1(2):e201800070. doi: 10.26508/lsa.201800070 (PMC6238541; doi:10.26508/lsa.201800070)
Supplement: Supplementary file 2 [file LSA-2018-00070_TableS2.xlsx]

## Sheet: Table S2A GR
Table S2A: Enrichment of gene ontology (GO) terms in the GFP-(GR)149 interactors in primary neurons and HEK293 cells
GR vs GFP_neurons vs_HEK
Neurons: 1D SCORE of Welch's T-test Difference LFQ intensity pGR_LFQ intensity GFP s0=1, fdr=5%	HEK293: 1D SCORE of Welch's T-test Difference HEK_GR vs HekGFP Welch FDR 5%, S0=1, 66% vv 1D SCORE	C: Type	N: Size	N: P value	N: Benj. Hoch. FDR	T: Names
0.363063	0.701737	C: C: GOMF name	123	0	0	structural constituent of ribosome
0.330792	0.641969	C: C: GOBP slim name	122	0	0	translation
0.24142	0.562085	C: C: GOCC slim name	349	0	0	ribonucleoprotein complex
0.317327	0.664187	C: C: GOCC slim name	101	0	0	ribosome
-0.0579258	-0.396862	C: C: GOCC slim name	442	0	0	vesicle
0.312817	0.677107	C: C: Keywords	190	0	0	Ribonucleoprotein
0.337638	0.728841	C: C: Keywords	142	0	0	Ribosomalprotein
-0.0384753	-0.388766	C: C: GOCC name	456	0	0	membrane-bounded vesicle
0.24531	0.562358	C: C: GOCC name	351	0	0	ribonucleoprotein complex
0.329028	0.654995	C: C: GOCC name	109	0	0	ribosome
-0.0395485	-0.393659	C: C: GOCC name	461	0	0	vesicle
-0.0502045	-0.368031	C: C: GOCC slim name	403	1.11e-15	3.75e-14	extracellular organelle
0.45136	0.578465	C: C: KEGG name	80	2.22e-16	5.62e-14	Ribosome
-0.0333497	-0.36715	C: C: GOCC name	421	4.44e-16	7e-14	extracellular vesicular exosome
-0.0333497	-0.36715	C: C: GOCC name	421	4.44e-16	8.17e-14	extracellular organelle
-0.0333497	-0.36715	C: C: GOCC name	421	4.44e-16	9.81e-14	extracellular membrane-bounded organelle
-0.0228255	-0.339229	C: C: GOCC name	444	2.71e-14	3.74e-12	extracellular region part
0.268781	0.419219	C: C: GOMF name	172	1.33e-14	1.72e-11	structural molecule activity
0.117569	0.295682	C: C: GOCC name	443	7.19e-12	7.94e-10	non-membrane-bounded organelle
0.117569	0.295682	C: C: GOCC name	443	7.19e-12	8.83e-10	intracellular non-membrane-bounded organelle
0.106126	0.286162	C: C: GOCC slim name	429	8.08e-11	2.18e-09	intracellular non-membrane-bounded organelle
0.101084	0.42678	C: C: GOBP slim name	172	2.46e-11	3.54e-09	RNA processing
0.0605665	0.394039	C: C: GOCC slim name	179	5.02e-10	1.13e-08	nucleolus
0.0558411	0.667573	C: C: GOBP slim name	58	2.85e-10	2.74e-08	rRNA processing
0.0525737	0.393849	C: C: GOCC name	184	3.08e-10	3.09e-08	nucleolus
0.341357	0.632753	C: C: GOCC slim name	47	2.44e-09	4.71e-08	small ribosomal subunit
0.0069738	-0.277965	C: C: Keywords	402	9.93e-10	1.16e-07	Cytoplasm
-0.0227091	-0.289829	C: C: Keywords	382	7.96e-10	1.24e-07	Directproteinsequencing
0.0793039	0.311838	C: C: GOBP slim name	278	3.17e-09	1.82e-07	RNA metabolic process
0.112131	0.232639	C: C: GOBP slim name	616	2.79e-09	2.01e-07	macromolecule metabolic process
0.341357	0.632753	C: C: GOCC name	47	2.44e-09	2.25e-07	small ribosomal subunit
-0.000820686	-0.326759	C: C: GOMF name	282	2.63e-10	2.27e-07	protein binding
0.136199	0.198911	C: C: GOCC slim name	783	1.38e-08	2.32e-07	macromolecular complex
-0.0365359	-0.247898	C: C: Keywords	634	4.24e-09	3.97e-07	Acetylation
-0.107194	-0.309517	C: C: Keywords	251	8.33e-09	6.5e-07	Nucleotide-binding
0.143437	0.194917	C: C: GOCC name	789	1e-08	8.52e-07	macromolecular complex
-0.0173114	-0.240111	C: C: GOCC name	847	1.48e-08	1.17e-06	membrane-bounded organelle
-0.100871	-0.355742	C: C: GOBP slim name	169	3.29e-08	1.58e-06	small molecule metabolic process
0.166108	0.28178	C: C: GOMF name	260	3.7e-09	2.39e-06	RNA binding
0.0378418	-0.349497	C: C: GOCC name	160	3.59e-08	2.64e-06	cytoskeletal part
0.0315375	-0.219593	C: C: Keywords	554	5.56e-08	3.72e-06	Phosphoprotein
-0.0219665	-0.245941	C: C: GOBP slim name	418	9.83e-08	4.04e-06	response to stimulus
-0.0859421	-0.282851	C: C: GOCC name	280	5.87e-08	4.05e-06	membrane part
-0.0453656	-0.220789	C: C: GOCC slim name	549	3.27e-07	4.9e-06	membrane
0.300295	0.609912	C: C: GOCC name	43	7.97e-08	5.18e-06	large ribosomal subunit
0.11792	0.744965	C: C: GOCC slim name	30	4.28e-07	5.78e-06	preribosome
-0.104512	-0.294108	C: C: GOMF name	275	1.31e-08	6.78e-06	purine nucleotide binding
0.0238163	-0.325536	C: C: GOCC name	178	1.14e-07	7e-06	cytosol
-0.107901	-0.290901	C: C: GOMF name	271	1.95e-08	7.22e-06	ribonucleotide binding
-0.0724392	-0.243646	C: C: GOMF name	486	2.44e-08	7.89e-06	catalytic activity
-0.107901	-0.290901	C: C: GOMF name	271	1.95e-08	8.42e-06	purine ribonucleotide binding
-0.107712	-0.283499	C: C: GOMF name	268	4.73e-08	1.36e-05	purine ribonucleoside triphosphate binding
0.0171561	-0.300477	C: C: GOCC slim name	170	1.93e-06	2.37e-05	cytosol
-0.111544	-0.39318	C: C: GOCC slim name	97	2.17e-06	2.45e-05	cytoplasmic membrane-bounded vesicle
0.11792	0.744965	C: C: GOCC name	30	4.28e-07	2.49e-05	preribosome
-0.0427253	-0.320834	C: C: GOBP slim name	173	7.2e-07	2.59e-05	anatomical structure development
0.395145	0.592815	C: C: GOCC name	33	5.4e-07	2.98e-05	cytosolic small ribosomal subunit
-0.00643666	-0.267749	C: C: GOBP slim name	253	9.45e-07	3.03e-05	response to chemical stimulus
-0.102294	-0.398465	C: C: GOCC name	103	8.84e-07	4.65e-05	cytoplasmic vesicle
0.0765911	0.20277	C: C: GOCC name	581	9.32e-07	4.68e-05	nuclear part
-0.0537374	-0.201591	C: C: GOCC slim name	495	4.57e-06	4.74e-05	protein complex
-0.0549138	-0.198819	C: C: GOBP slim name	637	2.15e-06	6.18e-05	biological regulation
-0.0960565	-0.260901	C: C: Keywords	251	1.14e-06	6.69e-05	Membrane
-0.0349631	-0.207368	C: C: GOCC name	564	1.55e-06	7.45e-05	membrane
-0.181059	-0.391232	C: C: GOBP slim name	82	4.03e-06	9.67e-05	organic acid metabolic process
-0.181059	-0.392345	C: C: GOBP slim name	82	3.83e-06	0.000100154	cellular ketone metabolic process
-0.0497722	-0.207522	C: C: GOCC name	499	2.46e-06	0.000113285	protein complex
-0.02769	-0.224942	C: C: GOBP slim name	326	8.05e-06	0.000178429	developmental process
-0.102664	-0.381102	C: C: GOCC name	98	4.28e-06	0.000188919	cytoplasmic membrane-bounded vesicle
0.183725	0.281501	C: C: Keywords	137	3.83e-06	0.000199146	RNA-binding
0.132986	0.192369	C: C: GOMF name	399	8.14e-07	0.000210748	nucleic acid binding
-0.120481	-0.236704	C: C: GOCC name	236	5.45e-06	0.000231466	organelle membrane
-0.171874	-0.454225	C: C: GOBP slim name	57	1.32e-05	0.000253188	nucleotide metabolic process
-0.223398	-0.445032	C: C: GOBP slim name	54	1.25e-05	0.000256323	protein folding
-0.207049	-0.484579	C: C: Keywords	52	5.91e-06	0.000276677	Chaperone
-0.0718662	-0.292787	C: C: GOMF name	202	1.19e-06	0.000279014	adenyl nucleotide binding
-0.00757344	-0.196756	C: C: GOBP slim name	421	1.86e-05	0.000333901	cellular component organization
0.13942	0.163586	C: C: GOBP slim name	314	2.11e-05	0.00035751	biosynthetic process
-0.0760815	-0.287979	C: C: GOMF name	199	1.94e-06	0.000417673	adenyl ribonucleotide binding
-0.0738575	-0.28496	C: C: Keywords	171	1.06e-05	0.000452017	ATP-binding
-0.148141	-0.408848	C: C: GOBP slim name	66	2.89e-05	0.000463067	nucleobase-containing small molecule metabolic process
-0.0324484	-0.370988	C: C: GOBP slim name	84	3.66e-05	0.000554132	cytoskeleton organization
0.0147819	-0.179285	C: C: GOCC slim name	408	6.72e-05	0.000648449	cytoplasm
0.0774648	0.774085	C: C: Keywords	20	1.71e-05	0.000668755	Ribosomebiogenesis
0.133012	0.722561	C: C: GOCC name	23	1.77e-05	0.000725207	small-subunit processome
-0.276108	-0.361946	C: C: GOCC name	59	1.91e-05	0.000751738	membrane-enclosed lumen
-0.114015	-0.498264	C: C: GOCC name	48	2.12e-05	0.000779166	pigment granule
-0.177111	-0.347218	C: C: GOBP slim name	76	5.79e-05	0.000794291	heterocycle metabolic process
-0.0424455	-0.353433	C: C: GOBP slim name	88	6.15e-05	0.000805063	protein complex assembly
-0.114015	-0.498264	C: C: GOCC name	48	2.12e-05	0.000806034	melanosome
0.0785418	0.315848	C: C: GOBP slim name	112	5.62e-05	0.000809234	mRNA metabolic process
-0.0756201	-0.278922	C: C: GOMF name	196	4.59e-06	0.000914441	ATP binding
0.122411	0.615296	C: C: GOCC name	30	3.12e-05	0.00107529	nucleolar part
0.057617	-0.334965	C: C: GOCC name	91	3.06e-05	0.00109033	plasma membrane part
-0.0408786	-0.323112	C: C: GOBP slim name	99	0.000110556	0.00132668	response to endogenous stimulus
0.147369	0.758216	C: C: GOBP slim name	17	0.000106497	0.00133353	ribosome biogenesis
0.795636	0.654942	C: C: Keywords	9	4.75e-05	0.00170961	rRNA-binding
0.0216544	-0.17873	C: C: GOCC name	414	5.14e-05	0.00172032	cytoplasm
-0.015763	-0.259565	C: C: GOCC slim name	146	0.000194301	0.00174871	plasma membrane
0.014355	-0.255933	C: C: GOCC slim name	135	0.000268521	0.00226564	cell projection
-0.00738921	-0.191071	C: C: GOMF name	935	1.28e-05	0.00236479	binding
-0.228713	-0.277325	C: C: GOCC name	80	8.63e-05	0.00280197	mitochondrial membrane
0.165357	0.151914	C: C: stress granule (Jain et al. , 2016)	114	0.00288357	0.00288357	stress granules
0.449481	0.584274	C: C: GOMF name	22	1.81e-05	0.00311571	rRNA binding
0.0880471	-0.343131	C: C: GOCC slim name	56	0.000424338	0.00336974	microtubule organizing center
-0.239481	-0.415601	C: C: GOBP slim name	39	0.000312454	0.00359947	cofactor metabolic process
-0.0103088	-0.261069	C: C: GOCC name	149	0.000147104	0.00464007	plasma membrane
-0.27177	-0.335396	C: C: GOCC name	50	0.000170651	0.00509184	organelle lumen
-0.27177	-0.335396	C: C: GOCC name	50	0.000170651	0.00523328	intracellular organelle lumen
-0.353669	-0.267355	C: C: Keywords	42	0.000159337	0.0053264	Mitochondrioninnermembrane
-0.297316	-0.219603	C: C: GOCC name	59	0.000199643	0.00537576	mitochondrial inner membrane
0.168534	0.867939	C: C: GOCC name	12	0.000190374	0.00538905	organellar large ribosomal subunit
0.102155	-0.353148	C: C: GOCC name	57	0.000195915	0.00540726	microtubule organizing center
0.168534	0.867939	C: C: GOCC name	12	0.000190374	0.00553087	mitochondrial large ribosomal subunit
0.403081	0.424113	C: C: GOCC name	25	0.000215141	0.00565515	cytosolic large ribosomal subunit
0.0597579	-0.257635	C: C: Keywords	118	0.000206771	0.00645126	Ublconjugation
0.00602204	-0.256937	C: C: GOCC name	137	0.000264529	0.00679164	cell projection
0.132727	-0.373597	C: C: GOMF name	57	4.27e-05	0.00689947	protein complex binding
3.51e-05	-0.32523	C: C: Keywords	84	0.000245426	0.00717871	Cytoskeleton
-0.0646538	-0.377079	C: C: GOBP slim name	55	0.000648392	0.00718219	carbohydrate metabolic process
0.132151	0.294447	C: C: GOCC slim name	75	0.00100324	0.0075243	spliceosomal complex
-0.017528	-0.189303	C: C: GOBP slim name	247	0.000734031	0.00782967	organelle organization
-0.0759766	-0.238655	C: C: GOBP slim name	136	0.000775915	0.00798084	protein transport
-0.12918	0.648919	C: C: Keywords	17	0.000292871	0.00806257	rRNAprocessing
-0.0753814	-0.232199	C: C: GOBP slim name	142	0.000840716	0.00834918	catabolic process
-0.0979412	-0.300956	C: C: GOBP slim name	80	0.000882429	0.00847132	membrane organization
0.545076	0.16669	C: C: GOCC slim name	15	0.00125963	0.00895	nucleosome
-0.0693571	-0.516768	C: C: GOMF name	40	5.89e-05	0.00896544	identical protein binding
-0.0473137	-0.262139	C: C: GOBP slim name	110	0.00101858	0.00946293	regulation of transport
-0.244399	-0.324736	C: C: Keywords	51	0.000393711	0.00969773	Oxidoreductase
-0.0980199	-0.296496	C: C: GOBP slim name	79	0.00111172	0.0100055	cellular membrane organization
0.453071	0.352834	C: C: Keywords	22	0.000388993	0.0101138	Citrullination
0.10372	0.27242	C: C: GOBP slim name	90	0.00122771	0.0107145	mRNA processing
0.120064	0.0975114	C: C: GOBP slim name	321	0.00128224	0.0108614	protein metabolic process
-0.152776	-0.259485	C: C: GOBP slim name	80	0.00141155	0.011615	vesicle-mediated transport
-0.176946	-0.29811	C: C: Keywords	71	0.000503897	0.0117912	Endoplasmicreticulum
0.572507	0.114466	C: C: GOCC name	16	0.000472181	0.0118475	protein-DNA complex
-0.0263323	-0.166263	C: C: GOBP slim name	294	0.00158191	0.0119892	establishment of localization
0.0800126	-0.132797	C: C: GOBP slim name	229	0.00157663	0.0122721	cellular component assembly
0.603527	0.633904	C: C: GOBP slim name	8	0.00166264	0.012278	translational elongation
0.0924112	-0.270505	C: C: GOBP slim name	67	0.00154882	0.0123906	regulation of organelle organization
-0.234686	-0.246709	C: C: GOCC name	67	0.000520037	0.0127582	organelle inner membrane
-0.0536085	-0.178903	C: C: GOMF name	422	9.13e-05	0.0131318	nucleotide binding
-0.184015	-0.334549	C: C: GOMF name	73	0.000107323	0.0146185	oxidoreductase activity
-0.147168	-0.324997	C: C: GOBP slim name	52	0.00227798	0.0164015	cellular amino acid metabolic process
0.0873969	-0.445144	C: C: GOMF name	41	0.000131582	0.0170267	receptor binding
0.0711144	0.285036	C: C: GOBP slim name	76	0.002493	0.0175118	RNA splicing
0.0175827	-0.358622	C: C: GOCC slim name	44	0.00268406	0.0181174	centrosome
-0.394751	-0.559428	C: C: GOCC name	16	0.00076571	0.018377	endoplasmic reticulum lumen
-0.145048	-0.312557	C: C: GOBP slim name	54	0.00268248	0.0183941	amine metabolic process
-0.0315659	-0.160968	C: C: GOBP slim name	277	0.00276016	0.0184867	transport
-0.00680147	-0.304733	C: C: Keywords	80	0.000845186	0.0188356	3D-structure
-0.0764173	-0.289591	C: C: GOCC slim name	69	0.00327097	0.0200718	cell body
-0.0796562	-0.376715	C: C: GOBP slim name	41	0.00308543	0.0201955	alcohol metabolic process
-0.0248835	-0.125414	C: C: GOCC slim name	661	0.00319345	0.0205293	intracellular membrane-bounded organelle
-0.185217	-0.0787565	C: C: Keywords	146	0.000991443	0.0210907	Mitochondrion
0.282906	0.776194	C: C: GOCC name	11	0.000980176	0.022544	organellar small ribosomal subunit
0.132151	0.294447	C: C: GOCC name	75	0.00100324	0.0226036	spliceosomal complex
0.282906	0.776194	C: C: GOCC name	11	0.000980176	0.0230237	mitochondrial small ribosomal subunit
0.153836	0.320967	C: C: KEGG name	75	0.000275698	0.0232505	Spliceosome
0.177403	-0.297258	C: C: GOBP slim name	33	0.0039563	0.0237378	cell adhesion
0.0633771	0.108144	C: C: GOBP slim name	731	0.00376887	0.0241208	primary metabolic process
0.177403	-0.297258	C: C: GOBP slim name	33	0.0039563	0.0242428	biological adhesion
0.249649	-0.428722	C: C: GOBP slim name	16	0.00391387	0.0245043	cell junction organization
0.0228554	-0.295898	C: C: GOBP slim name	58	0.00432137	0.0253991	cellular component movement
-0.111959	-0.259828	C: C: GOCC name	97	0.00115092	0.0254124	endoplasmic reticulum part
-0.0408427	0.447269	C: C: GOBP slim name	24	0.00477031	0.0264202	RNA catabolic process
0.144872	0.249335	C: C: GOBP slim name	68	0.00471762	0.0266407	ribonucleoprotein complex assembly
-0.324965	-0.250653	C: C: KEGG name	43	0.000427665	0.0270498	Huntington's disease
-0.00771023	-0.179266	C: C: GOBP slim name	181	0.00471593	0.0271637	response to stress
0.0834698	0.495117	C: C: KEGG name	37	0.000215247	0.0272288	Ribosome biogenesis in eukaryotes
0.545076	0.16669	C: C: GOCC name	15	0.00125963	0.0272673	nucleosome
-0.138991	-0.164577	C: C: Keywords	157	0.00136938	0.027864	Transport
0.0846262	-0.51529	C: C: GOCC name	22	0.00132657	0.0281641	contractile fiber part
0.0528294	-0.26206	C: C: GOBP slim name	63	0.00569207	0.0309305	regulation of protein modification process
-0.159613	-0.430445	C: C: Keywords	33	0.00165377	0.0309586	Calcium
-0.361373	-0.184126	C: C: GOCC name	32	0.00148867	0.0310094	mitochondrial membrane part
0.133462	-0.208049	C: C: Keywords	77	0.00180319	0.0312553	Isopeptidebond
0.900719	-0.738808	C: C: GOCC name	3	0.00153123	0.0313052	desmosome
-0.0574686	-0.363826	C: C: Keywords	49	0.00187808	0.0313908	Proteinbiosynthesis
-0.194848	-0.449473	C: C: Keywords	29	0.00161108	0.031416	NAD
0.0314547	0.129789	C: C: GOBP slim name	399	0.00593474	0.0316519	nucleobase-containing compound metabolic process
-0.57493	-0.300187	C: C: Keywords	12	0.00178644	0.032156	Tricarboxylicacidcycle
0.0914456	0.314855	C: C: Keywords	63	0.00207789	0.0335329	mRNAsplicing
-0.0644313	-0.577991	C: C: KEGG name	22	0.000811434	0.0342155	Glycolysis / Gluconeogenesis
-0.0824524	-0.599852	C: C: KEGG name	21	0.00069093	0.0349611	Purine metabolism
-0.0537883	-0.265471	C: C: Keywords	91	0.00229404	0.035787	Transferase
0.0557836	0.103285	C: C: GOBP slim name	750	0.00695498	0.0364188	cellular metabolic process
0.0666199	-0.622571	C: C: Keywords	14	0.00244573	0.0369227	Glycolysis
-0.33354	-0.304332	C: C: KEGG name	32	0.00104751	0.0378602	Alzheimer's disease
0.210891	-0.647942	C: C: GOCC name	11	0.00190042	0.0381467	actin filament
-0.242482	-0.436135	C: C: GOMF name	36	0.000317371	0.0391123	cofactor binding
0.0262472	-0.630535	C: C: Keywords	14	0.00267964	0.0391898	Stressresponse
0.0313574	-0.21335	C: C: GOCC slim name	98	0.0068327	0.040105	neuron projection
-0.166632	-0.031195	C: C: GOCC name	164	0.00206601	0.0407298	mitochondrial part
0.00300901	-0.266684	C: C: GOCC name	88	0.00210418	0.0407547	perinuclear region of cytoplasm
0.0227273	-0.425778	C: C: GOMF name	44	0.000349438	0.0411066	cytoskeletal protein binding
0.448094	-0.349561	C: C: GOCC slim name	9	0.00744078	0.0418544	filopodium
-0.0903865	-0.274263	C: C: GOBP slim name	60	0.00826457	0.0425035	cellular homeostasis
0.0997579	0.285405	C: C: Keywords	69	0.00310982	0.0441029	mRNAprocessing
0.0413284	-0.22991	C: C: GOBP slim name	75	0.00911327	0.046046	response to abiotic stimulus
-0.0249467	-0.128436	C: C: GOCC name	670	0.002509	0.0477575	intracellular membrane-bounded organelle
0.0175827	-0.358622	C: C: GOCC name	44	0.00268406	0.0502238	centrosome
-0.207393	-0.413054	C: C: GOMF name	40	0.000472764	0.0531962	protein dimerization activity
0.22713	-0.781774	C: C: KEGG name	8	0.00169822	0.0537062	Carbon fixation in photosynthetic organisms
0.280379	-0.631959	C: C: KEGG name	9	0.00333164	0.0561937	Arrhythmogenic right ventricular cardiomyopathy (ARVC)
-0.152521	-0.336293	C: C: GOBP slim name	32	0.0127245	0.0591073	generation of precursor metabolites and energy
0.0318106	-0.338481	C: C: GOBP slim name	33	0.0125421	0.0592153	cell motility
0.470242	-0.0204968	C: C: KEGG name	16	0.00328178	0.0593065	Systemic lupus erythematosus
-0.111706	-0.199777	C: C: GOBP slim name	87	0.0119913	0.0595431	homeostatic process
-0.0586389	-0.176562	C: C: GOBP slim name	138	0.0122315	0.0597061	signal transduction
-0.156076	-0.230742	C: C: Keywords	73	0.00436024	0.0600174	GTP-binding
0.401533	-0.645854	C: C: GOBP slim name	5	0.0125139	0.0600666	molting cycle
-0.192362	-0.355592	C: C: GOBP slim name	26	0.013276	0.0606902	endocytosis
-0.235923	-0.307006	C: C: KEGG name	37	0.00385531	0.0609621	Parkinson's disease
-0.0612306	-0.350563	C: C: GOBP slim name	33	0.0135649	0.0610421	response to extracellular stimulus
-0.110391	-0.237795	C: C: GOCC slim name	67	0.0114456	0.0618063	endoplasmic reticulum
0.342717	-0.387247	C: C: KEGG name	14	0.00322692	0.0628008	Wnt signaling pathway
-0.109875	-0.309137	C: C: Keywords	53	0.00470008	0.0628468	Disulfidebond
-0.0740942	-0.547275	C: C: GOMF name	26	0.000583199	0.0628883	protein homodimerization activity
0.039859	-0.406946	C: C: GOCC name	31	0.00351383	0.0635945	outer membrane
0.308357	-0.480626	C: C: GOCC name	12	0.0035971	0.0640516	extrinsic to plasma membrane
0.0742288	-0.268566	C: C: GOBP slim name	43	0.0144639	0.0640862	proteolysis involved in cellular protein catabolic process
0.039859	-0.406946	C: C: GOCC name	31	0.00351383	0.0646544	organelle outer membrane
0.159395	-0.382113	C: C: KEGG name	26	0.00316217	0.066669	Tight junction
0.0133069	-0.255052	C: C: GOBP slim name	57	0.015655	0.0672932	response to external stimulus
-0.15601	-0.349782	C: C: GOBP slim name	28	0.0155422	0.0678206	membrane invagination
0.0598649	-0.708906	C: C: KEGG name	9	0.00602546	0.0692928	Hypertrophic cardiomyopathy (HCM)
-0.0332107	-0.302507	C: C: GOBP slim name	42	0.0164815	0.0698039	locomotion
0.128142	-0.757943	C: C: GOCC name	8	0.00417884	0.0699007	stress fiber
0.524441	0.612343	C: C: GOCC name	8	0.00425762	0.0701555	methylosome
0.0167214	-0.525707	C: C: KEGG name	18	0.00473008	0.0703947	Leukocyte transendothelial migration
0.128142	-0.757943	C: C: GOCC name	8	0.00417884	0.0709761	actomyosin
0.277483	-0.553077	C: C: KEGG name	10	0.00505384	0.0710345	Axon guidance
0.128142	-0.757943	C: C: GOCC name	8	0.00417884	0.0720851	actin filament bundle
0.913649	0.471971	C: C: GOCC name	4	0.00412131	0.0722211	box C/D snoRNP complex
-0.0645047	-0.279479	C: C: GOCC name	70	0.00446427	0.0724787	cell body
-0.117151	-0.332201	C: C: KEGG name	50	0.0031526	0.0725099	Protein processing in endoplasmic reticulum
0.0598649	-0.708906	C: C: KEGG name	9	0.00602546	0.0725924	Dilated cardiomyopathy
-0.351841	-0.520134	C: C: Keywords	13	0.00560267	0.0728347	Redox-activecenter
0.112703	-0.545833	C: C: KEGG name	14	0.00562032	0.074839	Chemokine signaling pathway
-0.193297	0.0211417	C: C: Keywords	85	0.00593223	0.0750347	Transitpeptide
-0.564944	-0.531512	C: C: GOCC name	8	0.00474982	0.0759971	chaperonin-containing T-complex
0.219708	-0.33203	C: C: KEGG name	22	0.00601341	0.0760696	Pathways in cancer
-0.00946211	-0.353081	C: C: Keywords	39	0.00628011	0.0773445	Kinase
-0.155876	-0.213616	C: C: Keywords	73	0.00648622	0.0778346	Proteintransport
-0.29964	-0.250711	C: C: KEGG name	34	0.00315233	0.0797539	Oxidative phosphorylation
-0.0535675	-0.207056	C: C: GOMF name	191	0.000835331	0.0800681	ion binding
0.0086818	-0.321896	C: C: Keywords	45	0.00684594	0.0800976	Magnesium
-0.0928824	-0.300921	C: C: GOBP slim name	39	0.0192884	0.0805082	cellular ion homeostasis
-0.0533137	-0.208114	C: C: GOMF name	190	0.000810562	0.0806821	cation binding
-0.0343982	-0.295365	C: C: Keywords	56	0.00712333	0.0813102	Lipoprotein
-0.0530581	-0.209183	C: C: GOMF name	189	0.000786184	0.0813857	metal ion binding
-0.200655	-0.540538	C: C: KEGG name	15	0.00742242	0.0816466	Pyruvate metabolism
0.160509	-0.439411	C: C: KEGG name	21	0.0030332	0.0852666	Neurotrophin signaling pathway
0.147439	-0.0982587	C: C: Keywords	95	0.00805132	0.0897147	Methylation
-0.188117	-0.117415	C: C: GOCC slim name	65	0.0172922	0.0897863	Golgi apparatus
0.395385	-0.409441	C: C: GOCC name	10	0.00569594	0.0898332	filopodium
-0.38951	-0.422587	C: C: GOBP slim name	10	0.0218807	0.0900235	cell recognition
0.123299	-0.162987	C: C: GOCC name	85	0.00596928	0.0915289	anchoring junction
0.00751313	-0.113716	C: C: GOCC name	815	0.00589369	0.0916428	cytoplasmic part
-0.0214467	-0.308345	C: C: GOBP slim name	36	0.0228148	0.0925444	cell development
0.0437143	-0.156818	C: C: GOBP slim name	113	0.0239521	0.0958084	protein modification process
-0.200904	-0.311501	C: C: Keywords	34	0.0089297	0.0971883	Signal
-0.166993	-0.586993	C: C: GOCC slim name	10	0.0201942	0.0973651	lipid particle
-0.0487393	-0.3754	C: C: Keywords	32	0.00917651	0.0976047	Actin-binding
0.206175	-0.423906	C: C: KEGG name	15	0.00929596	0.0979949	Adherens junction
0.472613	0.708711	C: C: GOCC slim name	5	0.0197103	0.0985513	signal recognition particle
0.281761	0.496533	C: C: GOCC slim name	11	0.0220026	0.0990118	small nucleolar ribonucleoprotein complex
0.0573031	-0.471248	C: C: GOCC slim name	14	0.0213541	0.0994072	proteasome complex
0.53784	-0.58216	C: C: GOCC name	5	0.00661649	0.100063	lamin filament
0.826843	-0.828929	C: C: Keywords	2	0.0105768	0.103124	Wntsignalingpathway
-0.0549258	-0.438926	C: C: GOCC name	25	0.00692333	0.103289	mitochondrial outer membrane
-0.27574	-0.343794	C: C: Keywords	22	0.0105185	0.104737	ER-Golgitransport
0.0150964	-0.238861	C: C: Keywords	74	0.0100829	0.104862	Cellmembrane
-0.025891	-0.183597	C: C: Keywords	138	0.0109811	0.104881	Metal-binding
0.00902927	0.10291	C: C: GOBP slim name	425	0.026791	0.105696	cellular nitrogen compound metabolic process
-0.129083	-0.41483	C: C: GOBP slim name	18	0.0272173	0.105927	cellular aromatic compound metabolic process
-0.262139	-0.147861	C: C: Keywords	39	0.0104678	0.106498	Golgiapparatus
0.826843	-0.828929	C: C: KEGG name	2	0.0105768	0.107038	Circadian rhythm - plant
0.0389201	-0.206886	C: C: GOCC name	99	0.00729739	0.107418	neuron projection
0.0654839	-0.0991496	C: C: GOBP slim name	177	0.028446	0.109233	macromolecular complex assembly
-0.08159	-0.834031	C: C: KEGG name	6	0.0112692	0.109658	Amino sugar and nucleotide sugar metabolism
0.0656636	-0.212757	C: C: GOBP slim name	53	0.0293199	0.111107	proteolysis
0.0866851	-0.385722	C: C: GOBP slim name	17	0.0300262	0.112306	response to heat
0.385045	-0.435515	C: C: GOCC name	9	0.00788906	0.114599	basolateral plasma membrane
0.00846374	0.0999466	C: C: GOBP slim name	427	0.0312316	0.115317	nitrogen compound metabolic process
-0.141829	-0.257655	C: C: Keywords	51	0.0123283	0.115393	Glycoprotein
0.871349	-0.837274	C: C: GOCC name	2	0.00807918	0.115837	rough endoplasmic reticulum membrane
0.921596	0.680353	C: C: GOCC name	3	0.00823449	0.11655	dense fibrillar component
-0.08159	0.828917	C: C: GOCC name	6	0.00836343	0.116876	Pwp2p-containing subcomplex of 90S preribosome
0.281761	0.449329	C: C: GOBP slim name	11	0.0324485	0.118293	RNA modification
-0.431373	-0.323296	C: C: KEGG name	12	0.0134033	0.125594	Citrate cycle (TCA cycle)
0.132774	0.295272	C: C: GOCC name	46	0.0091534	0.126317	catalytic step 2 spliceosome
0.112878	-0.39049	C: C: GOMF name	34	0.00137206	0.126818	lipid binding
-0.417951	-0.410247	C: C: GOCC name	12	0.00956309	0.128752	smooth endoplasmic reticulum
0.628352	-0.0139567	C: C: GOCC name	7	0.00947475	0.129137	spindle midzone
-0.202729	-0.221205	C: C: GOBP slim name	31	0.0366769	0.130407	transmembrane transport
1	0.883171	C: C: Keywords	2	0.0142279	0.130562	Complementpathway
0.0212225	-0.236904	C: C: GOBP slim name	48	0.0365468	0.131568	response to drug
0.116479	-0.409789	C: C: GOCC name	20	0.00995793	0.132452	extrinsic to membrane
0.3125	-0.370985	C: C: GOBP slim name	8	0.0377274	0.132506	response to osmotic stress
-0.0227215	-0.170778	C: C: GOBP slim name	103	0.038526	0.133681	anatomical structure morphogenesis
-0.0312383	-0.241623	C: C: GOCC slim name	54	0.0308507	0.13435	neuronal cell body
0.113464	-0.154595	C: C: GOCC name	84	0.010592	0.134409	adherens junction
0.099883	-0.489076	C: C: GOCC name	15	0.010371	0.134701	leading edge membrane
0.481533	-0.584808	C: C: GOCC name	5	0.010313	0.135542	extrinsic to internal side of plasma membrane
0.826843	-0.828929	C: C: GOCC name	2	0.0105768	0.135777	protein kinase CK2 complex
-0.0665029	-0.291252	C: C: GOCC name	51	0.0109645	0.13601	microtubule
0.0241351	-0.22865	C: C: GOCC name	77	0.01088	0.136494	cell projection part
0.13425	-0.61907	C: C: GOCC name	9	0.0112942	0.138543	proteasome regulatory particle, base subcomplex
-0.110391	-0.237795	C: C: GOCC name	67	0.0114456	0.138857	endoplasmic reticulum
-0.0065493	-0.433063	C: C: KEGG name	20	0.0155078	0.140124	Focal adhesion
0.0238318	-0.445148	C: C: KEGG name	18	0.0161926	0.141267	Cell cycle
0.138749	0.313127	C: C: Keywords	35	0.0158348	0.142514	Spliceosome
-0.0817039	0.566079	C: C: GOCC slim name	8	0.0346254	0.146076	exosome (RNase complex)
-0.52095	-0.336767	C: C: KEGG name	8	0.0176429	0.148789	Peroxisome
-0.08159	0.781962	C: C: GOCC name	6	0.0126994	0.14915	organellar ribosome
0.0448629	-0.665156	C: C: GOCC slim name	6	0.0365467	0.149509	microvillus
-0.301004	-0.513305	C: C: GOCC name	12	0.0124933	0.14992	organelle envelope lumen
-0.08159	0.781962	C: C: GOCC name	6	0.0126994	0.150754	mitochondrial ribosome
-0.104845	-0.397748	C: C: Keywords	23	0.0179259	0.158289	Proteasome
0.610724	0.708914	C: C: Keywords	4	0.0189064	0.160876	Signalrecognitionparticle
-0.886801	-0.274414	C: C: Keywords	3	0.0187323	0.162347	CF(1)
0.0211204	0.0993719	C: C: Keywords	783	0.0196044	0.163837	Proteomicsidentification
0.4177	-0.553031	C: C: KEGG name	5	0.0201173	0.164183	T cell receptor signaling pathway
0.115742	-0.149027	C: C: GOCC name	78	0.0145709	0.165838	focal adhesion
0.115742	-0.149027	C: C: GOCC name	78	0.0145709	0.167565	cell-substrate junction
0.115742	-0.149027	C: C: GOCC name	78	0.0145709	0.169329	cell-substrate adherens junction
-0.134369	-0.199967	C: C: GOCC slim name	48	0.0442004	0.170487	extracellular space
0.114993	-0.472164	C: C: GOBP slim name	9	0.0505593	0.173346	DNA geometric change
0.110978	-0.329072	C: C: GOCC name	26	0.0153878	0.173348	membrane raft
-0.130015	-0.257956	C: C: GOMF name	82	0.00209186	0.174637	guanyl ribonucleotide binding
0.0345455	-0.13905	C: C: GOBP slim name	110	0.0517237	0.175252	multicellular organismal process
-0.0542145	-0.199751	C: C: GOCC slim name	68	0.044169	0.175377	cytoskeleton
-0.229063	-0.437472	C: C: GOMF name	27	0.00205152	0.176977	coenzyme binding
-0.129582	-0.254752	C: C: GOMF name	83	0.00219529	0.177544	guanyl nucleotide binding
0.19125	0.296527	C: C: GOMF name	53	0.00199522	0.178056	mRNA binding
-0.900556	0.00208623	C: C: GOCC slim name	2	0.0475117	0.178169	tricarboxylic acid cycle enzyme complex
0.278437	-0.52567	C: C: KEGG name	7	0.0233567	0.179068	Progesterone-mediated oocyte maturation
0.116503	-0.375801	C: C: KEGG name	18	0.0229962	0.181813	Endocytosis
-0.320695	-0.499332	C: C: GOCC name	11	0.0164637	0.183595	mitochondrial intermembrane space
0.770819	-0.392716	C: C: GOCC name	3	0.0166401	0.183707	nuclear nucleosome
-0.23331	-0.247923	C: C: GOBP slim name	20	0.0552474	0.185015	hydrogen transport
0.208225	-0.283093	C: C: GOMF name	34	0.00237105	0.185948	protein kinase binding
-0.188117	-0.117415	C: C: GOCC name	65	0.0172922	0.187162	Golgi apparatus
0.444615	-0.0867832	C: C: Keywords	10	0.0229945	0.188797	Nucleosomecore
0.613083	-0.653213	C: C: GOCC name	3	0.0172838	0.188924	nuclear lamina
-0.513017	-0.0127848	C: C: GOCC slim name	6	0.0518192	0.18907	NADH dehydrogenase complex
-0.105783	-0.380497	C: C: KEGG name	22	0.0263875	0.190744	Proteasome
-0.376801	-0.649233	C: C: KEGG name	6	0.025737	0.191514	Glyoxylate and dicarboxylate metabolism
-0.0735397	-0.433632	C: C: KEGG name	17	0.0276413	0.194257	Cardiac muscle contraction
-0.886801	-0.274414	C: C: GOCC name	3	0.0187323	0.196957	proton-transporting ATP synthase complex, catalytic core F(1)
0.114005	-0.452414	C: C: GOCC name	14	0.0190519	0.198428	Z disc
-0.886801	-0.274414	C: C: GOCC name	3	0.0187323	0.198851	mitochondrial proton-transporting ATP synthase complex, catalytic core F(1)
-0.0352272	-0.305142	C: C: KEGG name	34	0.0292056	0.199703	Phagosome
-0.582694	-0.147443	C: C: GOCC name	7	0.0186687	0.2001	late endosome
0.0496685	-0.380718	C: C: KEGG name	19	0.0300562	0.200111	Pathogenic Escherichia coli infection
0.472613	0.708711	C: C: GOCC name	5	0.0197103	0.201483	signal recognition particle, endoplasmic reticulum targeting
0.472613	0.708711	C: C: GOCC name	5	0.0197103	0.203366	signal recognition particle
-0.166993	-0.586993	C: C: GOCC name	10	0.0201942	0.204536	lipid particle
-0.130461	-0.250911	C: C: GOMF name	81	0.00272453	0.207385	GTP binding
-0.23059	-0.720595	C: C: Keywords	6	0.0258113	0.20827	Muscleprotein
-0.290042	-0.841574	C: C: KEGG name	4	0.0323004	0.209538	One carbon pool by folate
0.0651172	-0.367812	C: C: GOBP slim name	14	0.0662382	0.209633	establishment or maintenance of cell polarity
0.258096	0.132991	C: C: GOBP slim name	21	0.0656612	0.210116	one-carbon metabolic process
0.0360655	0.0730995	C: C: GOBP slim name	817	0.064422	0.210836	metabolic process
-0.0814763	-0.748607	C: C: GOBP slim name	4	0.0637344	0.210983	vitamin metabolic process
0.0901768	-0.21169	C: C: GOBP slim name	33	0.0654426	0.211769	protein modification by small protein conjugation or removal
0.0573031	-0.471248	C: C: GOCC name	14	0.0213541	0.214318	proteasome complex
0.250175	0.600035	C: C: Keywords	8	0.0272532	0.216178	Nonsense-mediatedmRNAdecay
-0.0816469	-0.556276	C: C: GOBP slim name	7	0.0691292	0.216404	nucleobase-containing compound catabolic process
0.323324	0.400052	C: C: GOBP slim name	8	0.070642	0.218762	protein alkylation
0.281761	0.496533	C: C: GOCC name	11	0.0220026	0.218837	small nucleolar ribonucleoprotein complex
-0.304536	-0.414148	C: C: KEGG name	11	0.0358729	0.221362	Propanoate metabolism
-0.708914	-0.0370822	C: C: Keywords	4	0.0286026	0.2231	4Fe-4S
0.505571	-0.449164	C: C: KEGG name	4	0.0352782	0.223135	VEGF signaling pathway
0.233673	-0.183111	C: C: GOCC slim name	16	0.06353	0.225699	site of polarized growth
0.0278899	-0.329308	C: C: GOCC slim name	19	0.0652754	0.225953	midbody
0.0473144	-0.0555387	C: C: GOCC slim name	365	0.0672172	0.226858	nucleus
0.132968	-0.31761	C: C: GOMF name	38	0.00311693	0.230475	kinase binding
0.223846	-0.896544	C: C: Keywords	3	0.0311221	0.231193	Cellshape
0.246862	-0.577522	C: C: Keywords	6	0.0302456	0.232048	Celladhesion
-0.173645	-0.166873	C: C: GOCC slim name	35	0.0707923	0.233097	endosome
-0.0814763	-0.869777	C: C: Keywords	4	0.0309093	0.233315	Nucleotidemetabolism
0.165882	-0.110218	C: C: GOBP slim name	32	0.0774929	0.237425	neurological system process
-0.31594	-0.166137	C: C: GOCC slim name	13	0.074893	0.240728	proton-transporting two-sector ATPase complex
0.351916	0.52223	C: C: GOBP slim name	5	0.0848949	0.244497	ribosome assembly
-0.0339382	-0.339713	C: C: GOBP slim name	17	0.0840911	0.244629	nucleoside metabolic process
0.204466	0.505732	C: C: GOBP slim name	7	0.0833515	0.244951	snoRNA processing
0.163345	-0.135522	C: C: GOBP slim name	28	0.0817533	0.24526	protein phosphorylation
-0.472145	-0.495648	C: C: GOBP slim name	4	0.0826659	0.245441	protein depolymerization
0.245651	-0.664579	C: C: GOBP slim name	3	0.0883168	0.246944	xenobiotic metabolic process
0.238858	0.138161	C: C: Keywords	32	0.0338009	0.247169	Chromosome
-0.00799096	-0.241361	C: C: GOBP slim name	34	0.0816471	0.24752	lipid metabolic process
0.131998	-0.0384779	C: C: GOBP slim name	63	0.0879673	0.248378	chromatin organization
-0.0132833	-0.399828	C: C: Keywords	18	0.0346734	0.249648	Mitochondrionoutermembrane
0.0695428	-0.0759229	C: C: GOBP slim name	129	0.0877703	0.250276	macromolecule modification
-0.286082	-0.0422924	C: C: GOBP slim name	15	0.0914941	0.250955	nuclear division
0.0995671	0.303802	C: C: GOCC slim name	21	0.0800074	0.251186	small nuclear ribonucleoprotein complex
0.051412	-0.153954	C: C: GOBP slim name	59	0.0925926	0.251572	protein targeting
0.0986014	0.571748	C: C: GOCC name	10	0.0255547	0.251897	exon-exon junction complex
0.306948	-0.483701	C: C: GOCC name	7	0.0258847	0.252891	fascia adherens
-0.0363986	-0.293218	C: C: Keywords	34	0.0362524	0.253226	Prenylation
-0.286082	-0.0422924	C: C: GOBP slim name	15	0.0914941	0.253368	mitosis
0.0578801	-0.657369	C: C: Keywords	6	0.0374599	0.254076	Multifunctionalenzyme
-0.00304094	-0.429895	C: C: Keywords	15	0.0369408	0.25424	Lyase
-0.0371027	-0.240107	C: C: GOCC name	58	0.0264551	0.256197	endoplasmic reticulum membrane
0.166435	0.670091	C: C: GOBP slim name	4	0.0953665	0.256687	mitochondrial translation
0.00866572	-0.277916	C: C: Keywords	36	0.0362369	0.256953	Ligase
-0.0169071	-0.324625	C: C: GOBP slim name	17	0.0968675	0.258313	tRNA aminoacylation for protein translation
-0.0717985	-0.341867	C: C: Keywords	24	0.0392164	0.258497	Isomerase
0.00994586	-0.357904	C: C: GOCC name	24	0.0271057	0.260214	nuclear matrix
0.178057	-0.473384	C: C: GOCC slim name	6	0.0851408	0.261227	apical part of cell
0.00235384	-0.494179	C: C: Keywords	11	0.0391747	0.261911	TPRrepeat
0.0616246	-0.443336	C: C: KEGG name	12	0.0435072	0.262079	Bacterial invasion of epithelial cells
-0.0972416	-0.574546	C: C: KEGG name	8	0.0447295	0.263176	Antigen processing and presentation
0.0178153	-0.370488	C: C: KEGG name	18	0.0459259	0.264074	ko05152
-0.0473538	0.638231	C: C: GOBP slim name	4	0.100718	0.266117	ribosomal small subunit biogenesis
-0.155214	-0.540492	C: C: Keywords	9	0.0424148	0.268245	Elongationfactor
-0.252618	-0.0315674	C: C: GOBP slim name	18	0.102464	0.26827	organelle fission
0.0857309	-0.117848	C: C: Keywords	92	0.043154	0.269281	Alternativesplicing
-0.910292	-0.504172	C: C: Keywords	2	0.0420838	0.269798	Pyrrolidonecarboxylicacid
-0.422657	-0.073007	C: C: Keywords	10	0.0415432	0.270031	Respiratorychain
-0.367297	-0.205824	C: C: Keywords	12	0.0450086	0.270051	Iron
-0.0492721	-0.327322	C: C: Keywords	25	0.0445256	0.270623	Initiationfactor
0.177288	-0.160576	C: C: GOCC slim name	21	0.0906355	0.271907	nuclear envelope
0.43679	-0.625145	C: C: KEGG name	3	0.0495193	0.272356	MAPK signaling pathway - yeast
-0.861613	0.226356	C: C: Keywords	2	0.0442394	0.272422	Lipoyl
0.133904	-0.503579	C: C: Keywords	8	0.0466496	0.2729	Fattyacidmetabolism
-0.526462	-0.0555362	C: C: GOBP slim name	4	0.106378	0.273543	cellular respiration
0.0220104	-0.257768	C: C: GOBP slim name	24	0.10554	0.273834	cellular lipid metabolic process
0.104235	-0.327786	C: C: Keywords	18	0.0465366	0.275685	Lipidmetabolism
-0.638135	-0.624913	C: C: Keywords	3	0.0477201	0.275716	GTPaseactivation
0.202232	-0.541725	C: C: KEGG name	6	0.0490849	0.275966	Amoebiasis
-0.099669	-0.427376	C: C: GOMF name	30	0.00386552	0.277888	calcium ion binding
0.397775	-0.659944	C: C: GOBP slim name	2	0.111074	0.283091	DNA ligation
0.241748	-0.58345	C: C: GOCC name	6	0.0298508	0.284098	nuclear proteasome complex
0.0132682	-0.605272	C: C: GOCC name	8	0.0302862	0.285777	ruffle
-0.0605742	-0.505486	C: C: GOCC name	12	0.0306026	0.286316	ruffle membrane
0.095989	0.0231636	C: C: GOBP slim name	128	0.113482	0.286691	cellular macromolecular complex assembly
-0.00626741	0.620822	C: C: GOBP slim name	4	0.117171	0.293438	cytoplasmic translation
-0.111111	-0.328379	C: C: GOCC name	27	0.0316391	0.293526	cytosolic part
0.101908	-0.0475079	C: C: GOBP slim name	79	0.120268	0.296045	chromosome organization
-0.00456751	-0.231627	C: C: GOCC name	56	0.0327619	0.296469	neuronal cell body
-0.091917	-0.204836	C: C: GOBP slim name	34	0.119482	0.296646	response to oxidative stress
0.0618017	-0.58118	C: C: GOCC name	8	0.0325972	0.297416	proteasome accessory complex
-0.0344528	0.214021	C: C: Keywords	48	0.0521421	0.297592	WDrepeat
0.0227502	-0.496933	C: C: KEGG name	9	0.057769	0.298277	Pentose phosphate pathway
-0.081363	0.842837	C: C: GOBP slim name	2	0.122229	0.298322	ribosomal large subunit biogenesis
0.141815	0.00598082	C: C: Keywords	82	0.0536827	0.299089	DNA-binding
-0.155417	-0.513582	C: C: GOCC name	11	0.0325161	0.299148	endoplasmic reticulum-Golgi intermediate compartment
0.243591	-0.294421	C: C: KEGG name	11	0.0557189	0.299934	Gastric acid secretion
-0.0814763	0.817201	C: C: GOCC name	4	0.0337992	0.300922	t-UTP complex
-0.0817039	0.566079	C: C: GOCC name	8	0.0346254	0.300995	exosome (RNase complex)
-0.0854737	-0.319064	C: C: GOBP slim name	15	0.124454	0.301201	Golgi organization
0.908206	0.671071	C: C: GOCC name	2	0.0336273	0.301826	pre-snoRNP complex
-0.0814196	-0.884482	C: C: KEGG name	3	0.0573525	0.302295	Streptomycin biosynthesis
0.893602	0.192629	C: C: Keywords	2	0.0536484	0.302499	Topoisomerase
-0.210571	-0.197734	C: C: GOCC name	33	0.0345572	0.302787	mitochondrial matrix
0.800417	-0.486787	C: C: GOCC name	2	0.0351373	0.303059	fatty acid beta-oxidation multienzyme complex
0.835188	-0.421766	C: C: GOCC name	2	0.0344915	0.304629	M band
-0.11304	-0.333405	C: C: GOBP slim name	13	0.128539	0.308493	protein polymerization
-0.0815331	-0.647805	C: C: KEGG name	5	0.0732734	0.308969	Starch and sucrose metabolism
0.388231	-0.44899	C: C: KEGG name	4	0.0712144	0.310642	Toxoplasmosis
-0.0101164	-0.0749215	C: C: GOCC slim name	1016	0.108708	0.312247	organelle
0.3125	-0.259689	C: C: KEGG name	8	0.0728645	0.312453	GnRH signaling pathway
-0.099471	-0.132757	C: C: Keywords	92	0.0568509	0.313014	Transmembrane
0.201025	-0.383337	C: C: KEGG name	9	0.0620507	0.313976	Shigellosis
0.0175439	-0.36669	C: C: KEGG name	15	0.0711425	0.315773	MAPK signaling pathway
0.00164435	-0.315514	C: C: KEGG name	21	0.0699511	0.316029	Regulation of actin cytoskeleton
0.0132774	-0.497632	C: C: Keywords	9	0.0587888	0.316243	Lipid-binding
-0.0114171	-0.247734	C: C: GOBP slim name	24	0.132894	0.316309	cell communication
-0.080387	-0.0254198	C: C: GOCC slim name	192	0.112558	0.31657	mitochondrion
-0.124972	-0.30808	C: C: GOMF name	52	0.00453551	0.317241	enzyme regulator activity
0.388432	-0.355122	C: C: KEGG name	5	0.0678569	0.317922	Pancreatic cancer
0.282509	-0.389826	C: C: GOCC slim name	5	0.108509	0.318451	endomembrane system
-0.306386	-0.189754	C: C: Keywords	15	0.0585215	0.318466	Electrontransport
0.19131	-0.282411	C: C: KEGG name	13	0.0694247	0.319354	Vasopressin-regulated water reabsorption
-0.0815331	-0.668432	C: C: KEGG name	5	0.0645004	0.319972	Type II diabetes mellitus
0.13757	-0.454696	C: C: KEGG name	8	0.0670852	0.320237	Fructose and mannose metabolism
0.368567	-0.79694	C: C: KEGG name	2	0.0776874	0.322212	Phototransduction
0.0695013	0.0476938	C: C: Keywords	368	0.0607749	0.323212	Nucleus
-0.404321	-0.524878	C: C: KEGG name	5	0.0666416	0.324237	Carbon fixation pathways in prokaryotes
0.0205761	-0.489712	C: C: Keywords	9	0.0618055	0.325	S-nitrosylation
-0.113212	-0.255592	C: C: Keywords	31	0.0637897	0.328062	Iontransport
-0.638135	0.195546	C: C: Keywords	3	0.0646524	0.328884	Ubiquinone
0.142439	-0.276417	C: C: GOBP slim name	11	0.139652	0.32967	signaling
-0.081761	-0.500815	C: C: Keywords	9	0.0636937	0.331207	Allostericenzyme
0.164755	-0.272308	C: C: GOBP slim name	10	0.142142	0.33282	cell-cell signaling
-0.12813	-0.198528	C: C: GOCC name	53	0.0389939	0.333715	extracellular space
-0.864395	-0.676634	C: C: GOCC name	2	0.0405001	0.341314	mitochondrial crista
-0.0413973	-0.201908	C: C: GOCC name	70	0.0408785	0.341893	cytoskeleton
-0.596934	-0.0558885	C: C: GOCC name	5	0.0403508	0.342671	neurofilament
-0.0190286	-0.323702	C: C: GOBP slim name	13	0.147689	0.34302	sulfur compound metabolic process
0.639991	0.463234	C: C: Keywords	3	0.0681816	0.343107	Adaptiveimmunity
-0.012816	-0.346076	C: C: KEGG name	16	0.0850147	0.346915	Aminoacyl-tRNA biosynthesis
-0.117819	-0.371717	C: C: GOCC name	19	0.0419059	0.347851	lysosomal membrane
-0.479544	-0.203161	C: C: Keywords	6	0.0699912	0.348467	ATPsynthesis
0.027928	-0.424709	C: C: Keywords	11	0.0714835	0.348482	Myristate
-0.11351	-0.73085	C: C: Keywords	4	0.0707767	0.348668	Pyruvate
-0.440933	-0.153125	C: C: Keywords	7	0.0742502	0.351001	Iron-sulfur
0.34701	-0.833102	C: C: Keywords	2	0.0728032	0.351257	Inflammatoryresponse
-0.0506481	-0.204279	C: C: GOBP slim name	32	0.154655	0.353497	death
0.121753	-0.203691	C: C: Keywords	27	0.0740696	0.35372	Ublconjugationpathway
-0.081761	-0.454305	C: C: KEGG name	9	0.092504	0.354599	Galactose metabolism
-0.142041	-0.35928	C: C: KEGG name	13	0.0954367	0.355081	Insulin signaling pathway
-0.0866552	0.385497	C: C: GOMF name	28	0.00549318	0.355409	RNA-dependent ATPase activity
0.173009	0.150912	C: C: KEGG name	33	0.0900688	0.356053	mRNA surveillance pathway
-0.000454715	0.323674	C: C: KEGG name	17	0.0943078	0.356118	RNA degradation
-0.0506481	-0.204279	C: C: GOBP slim name	32	0.154655	0.356325	cell death
0.0146853	-0.424406	C: C: KEGG name	10	0.0888648	0.35687	Valine, leucine and isoleucine degradation
-0.299439	-0.173062	C: C: Keywords	14	0.0767795	0.359328	Hydrogeniontransport
-0.0321404	-0.351813	C: C: KEGG name	15	0.0924123	0.359697	Gap junction
-0.297152	-0.181839	C: C: KEGG name	12	0.10118	0.360542	Arginine and proline metabolism
0.263297	0.403991	C: C: Keywords	9	0.0778218	0.3606	S-adenosyl-L-methionine
-0.123869	-0.208861	C: C: GOBP slim name	23	0.160463	0.361042	vesicle organization
-0.196912	-0.210947	C: C: GOBP slim name	15	0.15942	0.36152	membrane fusion
-0.151748	-0.400559	C: C: KEGG name	10	0.104607	0.362542	Methane metabolism
0.398329	-0.54335	C: C: GOCC name	4	0.0440514	0.362931	heterotrimeric G-protein complex
0.00997251	-0.360304	C: C: KEGG name	13	0.100622	0.363676	Calcium signaling pathway
0.744375	-0.703085	C: C: GOMF name	3	0.00591424	0.36443	Rho GDP-dissociation inhibitor binding
-0.0866552	0.385497	C: C: GOMF name	28	0.00549318	0.364522	RNA helicase activity
0.245112	-0.290066	C: C: KEGG name	8	0.103984	0.365388	Melanogenesis
-0.412621	-0.261589	C: C: Keywords	7	0.0799436	0.3668	ADP-ribosylation
0.0282721	-0.14243	C: C: GOBP slim name	54	0.164622	0.367527	phosphorus metabolic process
0.506843	-0.317328	C: C: KEGG name	3	0.100334	0.36789	Fatty acid elongation in mitochondria
-0.253239	-0.0389085	C: C: Keywords	20	0.0851725	0.37253	Endosome
0.744375	-0.703085	C: C: GOMF name	3	0.00591424	0.373318	GDP-dissociation inhibitor binding
-0.0738535	-0.150813	C: C: Keywords	77	0.0837762	0.373403	Coiledcoil
0.229613	-0.185885	C: C: Keywords	14	0.0846383	0.373686	Calmodulin-binding
-0.513017	-0.0127848	C: C: GOCC name	6	0.0518192	0.373911	respiratory chain complex I
-0.0866552	0.385497	C: C: GOMF name	28	0.00549318	0.374115	ATP-dependent RNA helicase activity
-0.0390516	-0.569386	C: C: Keywords	6	0.0831507	0.374178	Transmembranebetastrand
-0.303958	0.114246	C: C: GOBP slim name	7	0.170203	0.374186	interspecies interaction between organisms
-0.161821	0.212415	C: C: Keywords	19	0.0824662	0.374701	Translationregulation
-0.0553986	-0.160056	C: C: GOBP slim name	47	0.169704	0.375959	ion transport
-0.303273	-0.759401	C: C: GOCC name	4	0.0494183	0.376261	sarcomere
-0.513017	-0.0127848	C: C: GOCC name	6	0.0518192	0.376371	NADH dehydrogenase complex
0.428173	-0.261274	C: C: GOCC name	6	0.0511541	0.376494	nuclear outer membrane
0.263197	-0.147948	C: C: GOCC name	17	0.0484442	0.376637	site of polarized growth
0.73644	-0.501391	C: C: GOCC name	2	0.0461554	0.377449	photoreceptor outer segment membrane
0.787204	-0.368915	C: C: GOCC name	2	0.0492922	0.377907	zymogen granule membrane
0.0586318	-0.339568	C: C: GOCC name	19	0.0489851	0.378179	cell projection membrane
0.854659	0.570236	C: C: GOCC name	2	0.0500868	0.378738	centromeric heterochromatin
0.17805	-0.331033	C: C: GOCC name	13	0.0511229	0.37879	intermediate filament
-0.513017	-0.0127848	C: C: GOCC name	6	0.0518192	0.378864	mitochondrial respiratory chain complex I
-0.18987	-0.188773	C: C: GOBP slim name	16	0.173735	0.379059	organelle fusion
0.263197	-0.147948	C: C: GOCC name	17	0.0484442	0.379308	growth cone
0.230098	-0.419169	C: C: GOCC name	8	0.0506687	0.380532	nuclear inner membrane
-0.0814196	0.869172	C: C: GOCC name	3	0.0510902	0.381105	box H/ACA RNP complex
0.195693	-0.497258	C: C: GOCC name	7	0.0484327	0.381926	cytosolic proteasome complex
-0.08159	-0.652487	C: C: GOCC name	6	0.0481137	0.38214	MCM complex
0.0473001	-0.0638381	C: C: GOCC name	373	0.0478404	0.382723	nucleus
-0.107062	-0.161573	C: C: GOBP slim name	33	0.178131	0.382848	Golgi vesicle transport
-0.900556	0.00208623	C: C: GOCC name	2	0.0475117	0.382868	tricarboxylic acid cycle enzyme complex
-0.184409	-0.323472	C: C: GOBP slim name	9	0.17702	0.383321	regulation of body fluid levels
0.203897	-0.691951	C: C: Keywords	3	0.0888103	0.384845	Fattyacidbiosynthesis
-0.900556	0.00208623	C: C: GOCC name	2	0.0475117	0.385683	mitochondrial tricarboxylic acid cycle enzyme complex
-0.885446	-0.31546	C: C: GOMF name	4	0.00651976	0.392399	hydrogen ion transporting ATP synthase activity, rotational mechanism
0.423059	0.279289	C: C: Keywords	6	0.0942341	0.397311	Innateimmunity
0.0135638	-0.224342	C: C: Keywords	35	0.0928169	0.398517	Microtubule
0.230805	-0.76618	C: C: GOCC name	3	0.0585403	0.398941	centriolar satellite
-0.103842	-0.111204	C: C: Keywords	80	0.0940317	0.400062	Transmembranehelix
-0.353427	-0.295105	C: C: GOCC name	10	0.0576229	0.400099	peroxisomal part
0.208047	0.346058	C: C: GOCC name	15	0.0583512	0.400123	virion part
-0.189246	-0.448935	C: C: Keywords	8	0.0983481	0.400234	Flavoprotein
-0.0497556	-0.471369	C: C: Keywords	8	0.0992594	0.40046	Porin
-0.11322	-0.322028	C: C: GOCC name	22	0.0558945	0.400698	vacuolar membrane
0.142948	-0.325402	C: C: Keywords	11	0.0968453	0.401094	Lipidbiosynthesis
0.0555279	0.508723	C: C: Keywords	7	0.0960391	0.401306	RNA-mediatedgenesilencing
0.568546	0.672002	C: C: GOCC name	3	0.0564714	0.402222	histone pre-mRNA 3'end processing complex
0.208047	0.346058	C: C: GOCC name	15	0.0583512	0.402624	viral nucleocapsid
-0.353427	-0.295105	C: C: GOCC name	10	0.0576229	0.402631	microbody part
0.0119423	-0.235534	C: C: GOCC name	41	0.0573312	0.403144	cell-cell junction
-0.189246	-0.448935	C: C: Keywords	8	0.0983481	0.403745	FAD
0.142458	-0.511415	C: C: GOCC name	7	0.0570631	0.403831	microvillus
-0.090689	-0.134528	C: C: GOBP slim name	45	0.189461	0.404184	cell proliferation
0.109716	-0.482218	C: C: Keywords	6	0.105628	0.405196	Transducer
-0.153023	-0.32938	C: C: GOMF name	39	0.00690936	0.406396	ion transmembrane transporter activity
0.140316	0.348283	C: C: Keywords	13	0.105119	0.406575	Virion
0.307451	-0.287953	C: C: GOBP slim name	4	0.192232	0.40708	circulatory system process
0.140316	0.348283	C: C: Keywords	13	0.105119	0.409964	Viralnucleoprotein
-0.0814196	0.82649	C: C: GOCC name	3	0.0631941	0.41039	preribosome, large subunit precursor
-0.357974	-0.20014	C: C: GOCC name	11	0.0614598	0.411222	proton-transporting ATP synthase complex
-0.487483	0.578581	C: C: Keywords	2	0.104714	0.411817	Chromosomepartition
-0.37378	-0.361808	C: C: Keywords	6	0.103004	0.412017	Pyridoxalphosphate
-0.0613523	0.22729	C: C: GOCC name	35	0.0623453	0.412151	nuclear speck
-0.0814196	0.82649	C: C: GOCC name	3	0.0631941	0.412818	PeBoW complex
-0.169001	-0.176899	C: C: GOCC name	37	0.062083	0.41289	endosome
-0.0766364	-0.418977	C: C: KEGG name	9	0.120815	0.413058	Vascular smooth muscle contraction
-0.0814196	0.827418	C: C: GOCC name	3	0.0629079	0.413395	preribosome, small subunit precursor
-0.357974	-0.20014	C: C: GOCC name	11	0.0614598	0.413729	mitochondrial proton-transporting ATP synthase complex
-0.111963	-0.307263	C: C: GOCC name	23	0.0612615	0.414924	vacuolar part
0.344228	-0.72879	C: C: Keywords	2	0.104651	0.415057	Steroid-binding
-0.081761	-0.346611	C: C: GOBP slim name	9	0.197476	0.415133	pigment metabolic process
-0.0815331	-0.465087	C: C: GOBP slim name	5	0.198974	0.415249	mitotic cell cycle
-0.0815331	-0.5777	C: C: Keywords	5	0.110504	0.417065	Calcium/phospholipid-binding
0.108491	0.561029	C: C: GOMF name	15	0.00726644	0.417901	snoRNA binding
0.216179	-0.352046	C: C: KEGG name	6	0.138768	0.417956	Long-term depression
0.563906	0.63164	C: C: GOCC name	3	0.0649361	0.419237	90S preribosome
-0.356595	-0.196092	C: C: KEGG name	7	0.137695	0.41972	Amyotrophic lateral sclerosis (ALS)
-0.48331	-0.691933	C: C: KEGG name	2	0.142786	0.420055	Two-component system
-0.08159	0.570084	C: C: GOCC name	6	0.0654836	0.420313	nuclear exosome (RNase complex)
-0.0623985	-0.738808	C: C: Keywords	3	0.1123	0.420453	Cytokine
-0.0815331	-0.5777	C: C: Keywords	5	0.110504	0.420456	Annexin
0.122185	-0.186147	C: C: KEGG name	21	0.134639	0.42054	Oocyte meiosis
-0.081761	-0.404457	C: C: KEGG name	9	0.133823	0.423214	Pyrimidine metabolism
-0.196092	-0.343136	C: C: GOBP slim name	7	0.206019	0.42381	cellular aldehyde metabolic process
-0.081363	-0.84701	C: C: KEGG name	2	0.137554	0.424403	Butirosin and neomycin biosynthesis
-0.48331	-0.691933	C: C: KEGG name	2	0.142786	0.424997	Synthesis and degradation of ketone bodies
0.184329	0.352108	C: C: GOBP slim name	7	0.205163	0.425087	DNA modification
0.0253902	-0.391645	C: C: KEGG name	9	0.132779	0.42523	Fatty acid metabolism
0.399616	-0.0722765	C: C: GOCC name	8	0.0686844	0.425998	nuclear euchromatin
0.0735294	-0.317986	C: C: KEGG name	12	0.131462	0.426409	Pancreatic secretion
0.0620662	-0.100058	C: C: GOCC name	122	0.0676733	0.426922	cell junction
-0.0818073	-0.359059	C: C: GOCC name	17	0.0673165	0.427111	stored secretory granule
-0.0814196	-0.852934	C: C: GOCC name	3	0.0669537	0.427266	immunological synapse
0.0762535	-0.545787	C: C: KEGG name	4	0.15048	0.427769	Prostate cancer
-0.485123	-0.173408	C: C: GOCC name	6	0.0686831	0.428396	proton-transporting two-sector ATPase complex, catalytic domain
-0.147656	0.281252	C: C: KEGG name	11	0.130518	0.428844	Protein export
-0.0149269	-0.391204	C: C: GOCC name	14	0.0683954	0.429026	sarcolemma
0.0660158	0.598675	C: C: GOCC name	6	0.0696242	0.429414	U4/U6 x U5 tri-snRNP complex
-0.381118	-0.555324	C: C: KEGG name	3	0.152799	0.429535	Nitrogen metabolism
0.202929	-0.35251	C: C: KEGG name	6	0.147897	0.430092	TGF-beta signaling pathway
0.110801	-0.468014	C: C: KEGG name	5	0.149781	0.43062	Benzoate degradation
0.0215238	-0.228218	C: C: GOMF name	85	0.00798955	0.43077	enzyme binding
-0.0522786	-0.145545	C: C: GOMF name	247	0.00766425	0.431197	hydrolase activity
-0.0583612	-0.123572	C: C: GOBP slim name	58	0.219529	0.433044	regulation of cell cycle
0.0756794	-0.512056	C: C: KEGG name	5	0.130306	0.433783	Butanoate metabolism
0.257249	-0.409186	C: C: GOBP slim name	3	0.219155	0.435288	protein catabolic process
-0.0184022	-0.184071	C: C: GOBP slim name	29	0.223845	0.43559	aging
-0.14169	-0.262488	C: C: GOBP slim name	12	0.2134	0.435881	cellular component disassembly
-0.202509	-0.413798	C: C: GOBP slim name	5	0.215191	0.436443	detection of stimulus
-0.0629065	-0.131396	C: C: GOBP slim name	50	0.222818	0.436541	cellular component morphogenesis
0.067643	-0.469317	C: C: KEGG name	6	0.129486	0.436798	Viral myocarditis
0.195124	-0.295287	C: C: Keywords	9	0.117659	0.437018	Sarcoplasmicreticulum
-0.25724	-0.15832	C: C: GOBP slim name	9	0.218532	0.437063	response to starvation
0.533751	0.176989	C: C: KEGG name	3	0.157323	0.437394	PPAR signaling pathway
0.0792565	-0.0859312	C: C: GOBP slim name	47	0.227824	0.437423	immune system process
0.0266059	-0.0466116	C: C: GOBP slim name	1118	0.217393	0.437826	cellular process
-0.528512	-0.350139	C: C: GOBP slim name	2	0.226824	0.438425	glycerol ether metabolic process
0.000654981	-0.314484	C: C: GOMF name	46	0.00798007	0.439413	kinase activity
-0.100369	-0.219996	C: C: Keywords	29	0.120696	0.441294	Cellprojection
-0.285167	-0.579213	C: C: Keywords	4	0.119938	0.441975	Oxidation
-0.204468	-0.213985	C: C: KEGG name	14	0.16193	0.445306	Vibrio cholerae infection
0.0679794	-0.307978	C: C: GOCC name	18	0.0755491	0.44842	lamellipodium
-0.534075	-0.890821	C: C: GOCC name	2	0.0741743	0.449936	peroxisomal matrix
-0.340445	-0.420696	C: C: GOCC name	7	0.0750854	0.450513	endoplasmic reticulum-Golgi intermediate compartment membrane
0.36509	-0.808067	C: C: GOCC name	2	0.0755053	0.450583	I band
-0.0176448	-0.121522	C: C: GOBP slim name	65	0.236392	0.450867	localization
0.117581	-0.0979056	C: C: GOCC name	57	0.0764783	0.451508	nuclear chromosome part
-0.31594	-0.166137	C: C: GOCC name	13	0.074893	0.451814	proton-transporting two-sector ATPase complex
-0.0818754	-0.43686	C: C: GOCC name	11	0.0737481	0.452322	eukaryotic translation initiation factor 3 complex
-0.534075	-0.890821	C: C: GOCC name	2	0.0741743	0.452422	microbody lumen
0.128943	0.272628	C: C: GOCC name	24	0.0774343	0.45472	methyltransferase complex
-0.339647	-0.286512	C: C: Keywords	7	0.125661	0.455888	Peroxidase
0.153986	-0.256853	C: C: KEGG name	10	0.167715	0.456258	Epithelial cell signaling in Helicobacter pylori infection
-0.0204634	-0.168169	C: C: GOBP slim name	32	0.244307	0.459872	secretion
-0.0420882	-0.17933	C: C: GOBP slim name	28	0.242841	0.46012	regulation of mitotic cell cycle
0.0995671	0.303802	C: C: GOCC name	21	0.0800074	0.464885	small nuclear ribonucleoprotein complex
-0.0814196	0.778242	C: C: GOCC name	3	0.0796116	0.465033	U4/U6 snRNP
-0.381683	-0.258949	C: C: Keywords	6	0.129353	0.46567	Peroxisome
-0.0227119	-0.154746	C: C: GOBP slim name	37	0.250546	0.468553	peptidyl-amino acid modification
-0.174858	-0.46824	C: C: GOMF name	19	0.00911142	0.471607	oxidoreductase activity, acting on the CH-OH group of donors, NAD or NADP as acceptor
0.569638	0.0894847	C: C: GOCC name	4	0.0816549	0.471974	Prp19 complex
-0.362683	0.0524885	C: C: GOCC name	9	0.082538	0.474593	recycling endosome
-0.00628677	-0.0814055	C: C: GOCC name	1031	0.083216	0.476013	organelle
0.387344	-0.756606	C: C: GOCC name	2	0.0842537	0.477005	apical junction complex
-0.320763	-0.226431	C: C: GOMF name	25	0.00905453	0.478227	GDP binding
0.541783	-0.071727	C: C: GOCC name	4	0.0841646	0.478958	filamentous actin
-0.204666	-0.364769	C: C: KEGG name	7	0.181125	0.482364	Cysteine and methionine metabolism
-0.190119	-0.343401	C: C: KEGG name	8	0.18013	0.484818	Tryptophan metabolism
-0.0818182	-0.43972	C: C: GOCC name	10	0.086093	0.484932	eukaryotic 43S preinitiation complex
-0.124101	-0.692879	C: C: Keywords	3	0.137828	0.484989	Thiaminepyrophosphate
0.088331	-0.450023	C: C: Keywords	6	0.136897	0.485361	Polymorphism
0.680807	0.0222531	C: C: Keywords	2	0.13643	0.487397	Collagen
-0.178946	-0.343401	C: C: KEGG name	8	0.187144	0.488118	Lysine degradation
0.141934	-0.296439	C: C: KEGG name	8	0.186186	0.490677	Chagas disease (American trypanosomiasis)
-0.118033	-0.144496	C: C: GOCC name	56	0.0877971	0.49202	Golgi apparatus part
0.234052	-0.364417	C: C: GOBP slim name	3	0.269789	0.4949	endosome organization
-0.0954715	-0.249533	C: C: GOBP slim name	12	0.268164	0.495072	protein acylation
0.0181661	-0.240418	C: C: GOBP slim name	13	0.266646	0.495445	cytokinesis
-0.0816469	-0.449307	C: C: Keywords	7	0.142112	0.496332	Purinebiosynthesis
-0.0831345	-0.221427	C: C: GOBP slim name	15	0.273599	0.498712	cytoskeleton-dependent intracellular transport
-0.0827985	-0.122008	C: C: GOCC name	94	0.0900906	0.499799	integral to membrane
0.177288	-0.160576	C: C: GOCC name	21	0.0906355	0.500308	nuclear envelope
0.417305	-0.492693	C: C: GOCC name	3	0.0898273	0.500855	brush border membrane
-0.0830078	-0.119148	C: C: GOCC name	96	0.0912063	0.500954	intrinsic to membrane
0.157213	0.302462	C: C: GOBP slim name	7	0.277408	0.502475	multicellular organismal development
0.121508	-0.305255	C: C: KEGG name	8	0.194749	0.502771	Fc gamma R-mediated phagocytosis
-0.012816	-0.291959	C: C: Keywords	16	0.1469	0.505509	Aminoacyl-tRNAsynthetase
-0.114754	-0.200362	C: C: GOCC name	37	0.092575	0.505954	Golgi membrane
-0.0550375	-0.378039	C: C: GOCC name	13	0.0930788	0.506202	microtubule organizing center part
0.0627465	-0.274366	C: C: GOCC name	20	0.0941656	0.507116	midbody
-0.365789	-0.0498486	C: C: GOCC name	9	0.0937196	0.507188	endocytic vesicle membrane
-0.165327	-0.120018	C: C: Keywords	29	0.146647	0.508376	Celljunction
0.148857	-0.0652722	C: C: GOBP slim name	17	0.286768	0.509809	organelle assembly
0.019021	0.272797	C: C: GOBP slim name	10	0.285062	0.509924	gene silencing
-0.287409	-0.321703	C: C: Keywords	7	0.151717	0.510817	Acyltransferase
-0.0882198	0.133906	C: C: Keywords	38	0.149567	0.510929	Helicase
-0.153404	-0.235696	C: C: GOCC slim name	15	0.185556	0.511227	microbody
-0.178828	-0.270819	C: C: GOCC slim name	11	0.189712	0.512223	peroxisome
0.131939	0.124014	C: C: Keywords	39	0.151221	0.512838	Zinc-finger
-0.157483	-0.227203	C: C: GOBP slim name	10	0.285022	0.51304	autophagy
-0.359313	-0.475992	C: C: KEGG name	3	0.201926	0.516033	Glycine, serine and threonine metabolism
0.11205	-0.0562778	C: C: GOBP slim name	28	0.294271	0.516768	regulation of DNA metabolic process
-0.10012	-0.272775	C: C: GOCC name	23	0.0964601	0.516951	pore complex
-0.115063	-0.414691	C: C: KEGG name	6	0.204588	0.517607	Plant-pathogen interaction
0.0587324	-0.16007	C: C: GOBP slim name	20	0.293258	0.518148	regulation of protein stability
0.0392036	-0.301926	C: C: GOMF name	43	0.010227	0.518971	ligase activity
0.368567	-0.478442	C: C: GOCC slim name	2	0.199678	0.528559	photoreceptor inner segment
-0.0814196	-0.480167	C: C: GOBP slim name	3	0.304211	0.530986	purine-containing compound salvage
0.300348	-0.182439	C: C: KEGG name	5	0.212609	0.532574	Salivary secretion
-0.170352	-0.444014	C: C: GOMF name	20	0.0109479	0.534588	oxidoreductase activity, acting on CH-OH group of donors
-0.081363	0.897775	C: C: GOCC name	2	0.10038	0.535358	box H/ACA snoRNP complex
0.0639494	-0.24443	C: C: Keywords	17	0.161908	0.537397	Motorprotein
-0.28331	-0.296934	C: C: GOMF name	24	0.0112195	0.537703	hydrogen ion transmembrane transporter activity
-0.0866992	-0.567375	C: C: Keywords	4	0.160976	0.538121	One-carbonmetabolism
0.118392	-0.235702	C: C: GOCC slim name	11	0.211656	0.539125	cell cortex
0.840872	0.764324	C: C: GOMF name	3	0.0108625	0.540619	signal recognition particle binding
-0.349571	-0.454187	C: C: KEGG name	3	0.219252	0.543831	Terpenoid backbone biosynthesis
0.443672	-0.320932	C: C: KEGG name	2	0.222358	0.546181	Acute myeloid leukemia
0.143454	-0.431755	C: C: GOCC slim name	4	0.211174	0.548241	receptor complex
0.376217	-0.703755	C: C: GOCC name	2	0.10345	0.549079	myosin II complex
0.0454801	-0.12642	C: C: GOBP slim name	29	0.321101	0.550459	anatomical structure formation involved in morphogenesis
0.101955	-0.293122	C: C: KEGG name	8	0.226545	0.551114	Renal cell carcinoma
0.204361	-0.444908	C: C: KEGG name	3	0.229159	0.552164	Phenylalanine metabolism
0.207345	-0.247443	C: C: KEGG name	6	0.231694	0.553007	Colorectal cancer
0.201958	-0.00461538	C: C: GOBP slim name	10	0.320826	0.553281	tRNA processing
-0.081363	-0.570236	C: C: GOBP slim name	2	0.318999	0.553445	drug metabolic process
-0.0782123	-0.27802	C: C: GOBP slim name	8	0.326207	0.555904	muscle contraction
-0.0814196	-0.453259	C: C: GOBP slim name	3	0.331987	0.559136	neurotransmitter metabolic process
0.172486	-0.13661	C: C: GOBP slim name	8	0.330437	0.5598	DNA packaging
0.14064	-0.098331	C: C: GOBP slim name	12	0.349891	0.562952	exocytosis
0.059743	-0.111999	C: C: GOBP slim name	28	0.337425	0.564991	tRNA metabolic process
-0.26216	0.03777	C: C: GOBP slim name	5	0.34953	0.565531	hormone metabolic process
-0.207345	-0.221525	C: C: GOBP slim name	6	0.348039	0.566302	organelle localization
0.0453333	-0.500959	C: C: GOMF name	15	0.0122825	0.567629	carboxylic acid binding
-0.345859	0.0201809	C: C: GOBP slim name	3	0.34754	0.568702	oxidative phosphorylation
0.149695	0.139292	C: C: GOBP slim name	13	0.344627	0.570417	regulation of gene expression, epigenetic
0.082488	-0.0857645	C: C: GOBP slim name	27	0.346984	0.571036	rhythmic process
-0.081363	0.504172	C: C: GOBP slim name	2	0.343202	0.571343	transcription from RNA polymerase III promoter
-0.222493	-0.629526	C: C: GOCC name	4	0.108779	0.571868	paraspeckles
0.282509	-0.389826	C: C: GOCC name	5	0.108509	0.573179	endomembrane system
-0.0786641	-0.339447	C: C: GOMF name	36	0.0122427	0.576077	translation factor activity, nucleic acid binding
-0.297561	-0.379512	C: C: Keywords	1435	0.181483	0.581741	Referenceproteome
-0.323127	-0.545349	C: C: Keywords	3	0.182761	0.581851	DNArecombination
-0.081363	0.72879	C: C: Keywords	2	0.179132	0.582179	mRNAcapping
0.123027	0.167999	C: C: Keywords	28	0.178403	0.583865	Activator
0.0648536	0.52464	C: C: GOCC name	6	0.112268	0.584641	DNA replication factor A complex
0.0180136	0.0714786	C: C: GOCC name	965	0.111871	0.585335	intracellular organelle part
-0.297561	-0.379512	C: C: Keywords	1435	0.181483	0.585753	Completeproteome
-0.0108371	-0.0970066	C: C: GOBP slim name	59	0.366292	0.586067	cellular localization
-0.081363	-0.769124	C: C: Keywords	2	0.177969	0.586547	Serinebiosynthesis
0.297311	0.165154	C: C: Keywords	8	0.185561	0.586775	Immunity
-0.302577	-0.446379	C: C: Keywords	4	0.186878	0.586972	Glucosemetabolism
0.0328886	0.115504	C: C: GOBP slim name	39	0.372768	0.589874	nucleobase-containing compound transport
-0.178508	-0.138986	C: C: GOBP slim name	9	0.372112	0.59209	membrane docking
-0.0518015	-0.149378	C: C: GOBP slim name	22	0.376541	0.59259	growth
-0.0814763	-0.354805	C: C: GOBP slim name	4	0.378886	0.593039	cellular metabolic compound salvage
0.0101879	0.165765	C: C: GOCC name	61	0.114471	0.593312	nuclear body
1	0.883171	C: C: GOMF name	2	0.0142279	0.593901	opsonin binding
-0.0814196	-0.732313	C: C: GOCC name	3	0.116372	0.597558	acrosomal membrane
0.0254888	-0.237168	C: C: GOBP slim name	8	0.383912	0.597657	nucleus organization
-0.145918	-0.00832749	C: C: GOBP slim name	15	0.38604	0.59774	embryo development
-0.502782	-0.756606	C: C: GOCC name	2	0.116055	0.598716	zymogen granule
-0.0814196	-0.730457	C: C: GOCC name	3	0.11731	0.599585	eukaryotic translation elongation factor 1 complex
0.00946691	-0.0737132	C: C: GOBP slim name	80	0.400499	0.600749	DNA metabolic process
-0.226406	-0.0498605	C: C: GOBP slim name	6	0.398524	0.600915	endoplasmic reticulum organization
-0.269847	0.0222841	C: C: GOBP slim name	4	0.395347	0.602434	vacuole organization
-0.176799	-0.108704	C: C: GOBP slim name	9	0.397999	0.603283	protein maturation
1	0.883171	C: C: GOMF name	2	0.0142279	0.603637	kininogen binding
0.0426486	0.0747445	C: C: GOBP slim name	70	0.394797	0.604796	regulation of translation
0.0254888	-0.321404	C: C: GOCC slim name	8	0.242594	0.606485	cell leading edge
0.141063	-0.402851	C: C: GOCC name	7	0.11922	0.606536	apical part of cell
-0.00351805	-0.113005	C: C: GOBP slim name	35	0.408728	0.606771	response to biotic stimulus
-0.0596871	-0.140114	C: C: GOBP slim name	22	0.394296	0.607258	histone modification
-0.0926331	-0.124301	C: C: GOBP slim name	19	0.40727	0.60774	translational initiation
-0.103797	-0.390953	C: C: GOMF name	26	0.0134121	0.608956	magnesium ion binding
0.0562234	0.349631	C: C: GOCC name	13	0.120472	0.610098	U12-type spliceosomal complex
1	0.883171	C: C: GOMF name	2	0.0142279	0.613697	hyaluronic acid binding
0.0722882	-0.312835	C: C: Keywords	9	0.19846	0.615094	Intermediatefilament
-0.0861947	-0.153718	C: C: GOCC slim name	29	0.255235	0.6153	cell surface
0.0329995	-0.202811	C: C: GOBP slim name	9	0.419536	0.616462	microtubule organizing center organization
-0.0814763	0.483113	C: C: Keywords	4	0.19769	0.616793	Mitochondrionnucleoid
-0.0865589	-0.0669167	C: C: GOBP slim name	32	0.419059	0.618917	multi-organism process
-0.110402	-0.153475	C: C: Keywords	30	0.207065	0.621195	Cytoplasmicvesicle
0.0447387	-0.3777	C: C: KEGG name	5	0.27036	0.621828	NOD-like receptor signaling pathway
0.0571827	-0.388889	C: C: Keywords	6	0.208624	0.621884	Myosin
0.0212533	-0.199719	C: C: KEGG name	18	0.273162	0.622612	Cell cycle - yeast
-0.211445	-0.334663	C: C: Keywords	7	0.20268	0.624041	Antioxidant
1	0.883171	C: C: GOMF name	2	0.0142279	0.624099	complement component C1q binding
0.310601	0.515426	C: C: Keywords	3	0.205551	0.62466	Mitogen
-0.196893	-0.127238	C: C: Keywords	16	0.206908	0.624727	NADP
-0.081363	-0.63491	C: C: KEGG name	2	0.266929	0.625306	Arachidonic acid metabolism
0.0494549	0.0330146	C: C: GOCC slim name	243	0.254815	0.625454	nucleoplasm
0.109686	-0.343693	C: C: KEGG name	5	0.269536	0.625621	Carbohydrate digestion and absorption
-0.337047	0.374652	C: C: GOCC name	4	0.1243	0.626606	gap junction
-0.387149	-0.408258	C: C: Keywords	3	0.217174	0.627393	Symport
0.277662	0.526792	C: C: Keywords	3	0.213222	0.627595	Antiviraldefense
-0.0628492	-0.362954	C: C: Keywords	8	0.205328	0.628062	Potassium
0.11552	-0.433769	C: C: GOMF name	16	0.0155366	0.628263	signal transducer activity
-0.0815331	-0.40223	C: C: GOCC slim name	5	0.266011	0.630026	retromer complex
-0.224673	0.0372899	C: C: Keywords	12	0.212764	0.630211	Manganese
-0.235401	-0.328781	C: C: KEGG name	5	0.266684	0.63057	Prion diseases
-0.000537102	-0.197795	C: C: Keywords	25	0.217068	0.630981	Apoptosis
0.386648	-0.421766	C: C: Keywords	2	0.216278	0.632612	Schiffbase
1	0.883171	C: C: GOMF name	2	0.0142279	0.634859	adrenergic receptor binding
-0.376015	-0.410578	C: C: Keywords	3	0.223987	0.63531	2Fe-2S
0.0135731	-0.0536982	C: C: GOBP slim name	117	0.439407	0.635926	cell differentiation
-0.111408	0.144683	C: C: Keywords	20	0.223089	0.636619	Developmentalprotein
0.0426762	-0.0665074	C: C: GOBP slim name	45	0.442484	0.637177	chromatin modification
-0.0463977	-0.1586	C: C: GOMF name	162	0.0167428	0.637212	hydrolase activity, acting on acid anhydrides
-0.033792	-0.118044	C: C: GOBP slim name	28	0.438333	0.637575	cell division
0.190769	-0.261958	C: C: GOCC name	10	0.127076	0.637691	cell-cell adherens junction
-0.0815331	-0.441951	C: C: Keywords	5	0.222112	0.637721	Alternativeinitiation
-0.959666	0.447844	C: C: GOMF name	2	0.0165105	0.637747	profilin binding
0.11552	-0.433769	C: C: GOMF name	16	0.0155366	0.638235	molecular transducer activity
0.553236	0.326606	C: C: GOCC name	3	0.127792	0.63838	U7 snRNP
0.200186	-0.214103	C: C: GOBP slim name	3	0.437408	0.639459	amine transport
-0.0460812	-0.159616	C: C: GOMF name	161	0.0164292	0.644223	pyrophosphatase activity
0.00757731	0.0454906	C: C: GOCC slim name	898	0.301034	0.645072	intracellular organelle
-0.0754642	-0.0296769	C: C: GOCC name	197	0.129756	0.645271	mitochondrion
0.145175	0.277063	C: C: Keywords	10	0.233856	0.647601	Methyltransferase
-0.235122	-0.366829	C: C: Keywords	5	0.235269	0.647682	Lectin
-0.0815331	0.503693	C: C: GOCC name	5	0.134375	0.647816	transcriptionally active chromatin
-0.081363	-0.844923	C: C: GOCC name	2	0.138536	0.648067	nuclear membrane part
0.0165898	0.0682149	C: C: GOCC name	971	0.130995	0.648515	organelle part
0.680807	0.0222531	C: C: GOCC name	2	0.13643	0.649217	sheet-forming collagen
-0.269258	-0.120856	C: C: GOCC name	13	0.134102	0.649338	early endosome
-0.0816469	-0.45499	C: C: GOCC name	7	0.137163	0.649904	eukaryotic translation initiation factor 3 complex, eIF3m
-0.0815331	-0.431359	C: C: Keywords	5	0.233301	0.64991	Actincapping
-0.0818754	-0.36599	C: C: GOCC name	11	0.133171	0.650533	translation preinitiation complex
-0.081761	-0.320522	C: C: Keywords	9	0.232137	0.650538	DNAreplication
-0.081363	-0.844923	C: C: GOCC name	2	0.138536	0.650825	intrinsic to nuclear inner membrane
-0.0163275	-0.313263	C: C: GOCC name	15	0.13217	0.651409	cell cortex part
0.276934	0.478885	C: C: GOCC name	5	0.134022	0.651806	pICln-Sm protein complex
0.680807	0.0222531	C: C: GOCC name	2	0.13643	0.652027	collagen type IV
-0.286412	-0.140764	C: C: Keywords	7	0.238392	0.652442	Tumorsuppressor
-0.0718129	-0.21207	C: C: GOCC slim name	15	0.299758	0.652698	intracellular
0.392409	0.0952298	C: C: Keywords	4	0.231707	0.653247	Heparin-binding
-0.0818754	-0.36599	C: C: GOCC name	11	0.133171	0.653425	eukaryotic 48S preinitiation complex
-0.081363	-0.844923	C: C: GOCC name	2	0.138536	0.653606	integral to nuclear inner membrane
-0.0460812	-0.159616	C: C: GOMF name	161	0.0164292	0.654134	hydrolase activity, acting on acid anhydrides, in phosphorus-containing anhydrides
-0.081363	0.559805	C: C: GOCC slim name	2	0.295821	0.654687	mismatch repair complex
0.680807	0.0222531	C: C: GOCC name	2	0.13643	0.654862	collagen
0.253388	0.235066	C: C: GOCC name	11	0.141009	0.656854	U1 snRNP
0.159634	-0.0054696	C: C: GOCC slim name	18	0.29281	0.658822	nuclear chromosome
-0.376015	-0.275342	C: C: GOCC slim name	3	0.283298	0.659402	pyruvate dehydrogenase complex
0.303776	0.0709091	C: C: GOCC name	10	0.143925	0.667617	euchromatin
-0.00738505	-0.258423	C: C: Keywords	13	0.245501	0.667992	Palmitate
-0.0814196	0.502668	C: C: Keywords	3	0.247036	0.668282	Endonuclease
-0.0814196	0.299698	C: C: GOBP slim name	3	0.467101	0.669279	transcription initiation, DNA-dependent
-0.123332	-0.176571	C: C: GOCC slim name	16	0.292791	0.669946	nuclear pore
-0.22066	-0.290115	C: C: GOMF name	28	0.0178638	0.67002	monovalent inorganic cation transmembrane transporter activity
-0.191706	-0.415612	C: C: GOCC name	7	0.145834	0.670836	signalosome
0.503132	0.389933	C: C: GOCC name	3	0.145716	0.673099	U5 snRNP
-0.0546258	-0.344142	C: C: KEGG name	6	0.298265	0.673759	Glutathione metabolism
-0.0600202	0.162047	C: C: GOBP slim name	9	0.472934	0.674282	transcription from RNA polymerase II promoter
-0.232334	-0.350105	C: C: Keywords	5	0.251248	0.675771	Autophagy
-0.469402	-0.409597	C: C: Keywords	2	0.252721	0.675849	Growthregulation
0.0255141	-0.100778	C: C: GOBP slim name	26	0.479383	0.68011	behavior
-0.223402	-0.43333	C: C: GOMF name	16	0.0189866	0.682461	NAD binding
-0.916551	-0.922809	C: C: GOMF name	2	0.0188513	0.687141	L-lactate dehydrogenase activity
0.236516	-0.164878	C: C: KEGG name	5	0.309391	0.692708	Olfactory transduction
0.037658	-0.120611	C: C: GOBP slim name	16	0.491723	0.694197	cell morphogenesis
-0.081363	0.779555	C: C: GOCC name	2	0.151774	0.695262	intercellular bridge
-0.151953	-0.367653	C: C: GOCC name	9	0.152624	0.696268	microtubule cytoskeleton
-0.916551	-0.922809	C: C: GOMF name	2	0.0188513	0.696958	lactate dehydrogenase activity
-0.386685	-0.302714	C: C: Keywords	3	0.262577	0.698216	Aminotransferase
0.472613	0.708711	C: C: GOMF name	5	0.0197103	0.698769	7S RNA binding
0.214319	-0.128777	C: C: GOCC slim name	6	0.331457	0.699167	extracellular matrix
-0.128696	-0.145408	C: C: Keywords	21	0.2668	0.701474	Neurogenesis
0.0795819	0.402927	C: C: Keywords	5	0.265361	0.701632	Nuclease
-0.0286926	-0.180155	C: C: Keywords	25	0.269514	0.704651	Celldivision
-0.081363	-0.629346	C: C: Keywords	2	0.27117	0.705043	Proteaseinhibitor
0.229574	-0.232455	C: C: GOCC name	8	0.155861	0.708109	sarcoplasmic reticulum membrane
-0.300487	0.165738	C: C: Keywords	4	0.27485	0.710661	Spermatogenesis
0.0781979	-0.505836	C: C: GOMF name	12	0.0203415	0.711402	ADP binding
-0.0226942	-0.223061	C: C: KEGG name	13	0.321158	0.712745	Meiosis - yeast
0.238692	-0.236836	C: C: KEGG name	3	0.369718	0.714036	Metabolism of xenobiotics by cytochrome P450
0.180939	-0.198784	C: C: Keywords	7	0.278403	0.715893	Thiolprotease
-0.0169825	-0.225591	C: C: Keywords	15	0.280117	0.716364	Nitration
0.237564	0.411785	C: C: GOCC name	6	0.158611	0.717648	U4 snRNP
0.238692	-0.236836	C: C: KEGG name	3	0.369718	0.719528	Drug metabolism - cytochrome P450
0.0382241	-0.296435	C: C: GOMF name	36	0.0208631	0.719917	protein domain specific binding
-0.0815331	-0.323902	C: C: KEGG name	5	0.367854	0.72145	Thyroid cancer
0.314325	-0.262865	C: C: KEGG name	2	0.365576	0.722585	Toll-like receptor signaling pathway
-0.339049	-0.168478	C: C: GOCC name	7	0.162298	0.725412	peroxisomal membrane
0.0578801	-0.281381	C: C: KEGG name	6	0.350564	0.726988	beta-Alanine metabolism
-0.0818754	-0.562122	C: C: GOMF name	11	0.0213577	0.727285	DNA helicase activity
-0.239582	-0.460767	C: C: GOCC name	5	0.161484	0.727668	acrosomal vesicle
0.314325	-0.262865	C: C: KEGG name	2	0.365576	0.728274	Osteoclast differentiation
-0.339049	-0.168478	C: C: GOCC name	7	0.162298	0.728361	microbody membrane
0.107242	-0.32312	C: C: KEGG name	4	0.349677	0.731144	Valine, leucine and isoleucine biosynthesis
0.183636	-0.133775	C: C: KEGG name	6	0.381537	0.731279	Glioma
-0.305866	0.0494937	C: C: GOCC name	8	0.165808	0.732209	phagocytic vesicle membrane
-0.0368567	-0.603616	C: C: Keywords	2	0.288205	0.733042	Cyclosporin
0.427677	-0.482615	C: C: GOCC name	2	0.164748	0.733395	dendritic branch
0.314325	-0.262865	C: C: KEGG name	2	0.365576	0.734054	Natural killer cell mediated cytotoxicity
0.019222	-0.262784	C: C: GOCC name	17	0.165786	0.735051	intracellular
0.130367	-0.161037	C: C: KEGG name	9	0.349513	0.736891	Measles
0.0780584	-0.299192	C: C: GOCC name	11	0.167737	0.737776	blood microparticle
0.144499	-0.129824	C: C: GOCC slim name	9	0.366544	0.738558	extracellular region
-0.0927867	-0.145974	C: C: GOBP slim name	9	0.528319	0.738621	extracellular structure organization
-0.231753	-0.182938	C: C: KEGG name	6	0.341947	0.739423	Alanine, aspartate and glutamate metabolism
0.314325	-0.262865	C: C: KEGG name	2	0.365576	0.739927	Fc epsilon RI signaling pathway
0.335883	-0.255563	C: C: KEGG name	2	0.348446	0.740813	Caprolactam degradation
0.204361	-0.316632	C: C: KEGG name	3	0.336754	0.740858	Tyrosine metabolism
0.245993	0.127944	C: C: KEGG name	5	0.389541	0.741006	Various types of N-glycan biosynthesis
0.188392	-0.0315385	C: C: KEGG name	10	0.339858	0.741243	Ubiquitin mediated proteolysis
-0.0927867	-0.145974	C: C: GOBP slim name	9	0.528319	0.742224	extracellular matrix organization
0.0504417	0.452348	C: C: GOCC name	6	0.170762	0.745142	RNA cap binding complex
-0.081363	0.44854	C: C: KEGG name	2	0.394956	0.745701	Cytosolic DNA-sensing pathway
0.314325	-0.262865	C: C: KEGG name	2	0.365576	0.745894	B cell receptor signaling pathway
0.335883	-0.255563	C: C: KEGG name	2	0.348446	0.747091	Aminobenzoate degradation
0.253666	0.292598	C: C: GOCC name	8	0.170583	0.747315	SMN-Sm protein complex
-0.275418	-0.0337744	C: C: KEGG name	4	0.399394	0.748494	mTOR signaling pathway
-0.178508	0.0621943	C: C: GOCC slim name	9	0.365983	0.748601	cilium
0.112117	0.229631	C: C: GOBP slim name	4	0.538745	0.749559	post-embryonic development
0.196938	-0.293667	C: C: KEGG name	3	0.365414	0.751624	Biosynthesis of unsaturated fatty acids
-0.0814196	0.598005	C: C: GOCC name	3	0.172981	0.751854	Mpp10 complex
0.435933	0.213266	C: C: GOCC name	4	0.17454	0.755658	fibrillar center
0.0893717	0.190963	C: C: GOCC name	29	0.175936	0.755772	RNA granule
-0.0814763	0.510272	C: C: GOCC name	4	0.175286	0.755922	cytoplasmic exosome (RNase complex)
0.244892	0.0715325	C: C: GOCC name	13	0.179262	0.758257	heterochromatin
-0.335653	0.00603108	C: C: GOCC slim name	3	0.365405	0.758917	transcription export complex
-0.081363	0.72879	C: C: GOCC name	2	0.179132	0.760622	nuclear cap binding complex
0.129055	-0.137261	C: C: GOCC name	22	0.178849	0.762352	organelle envelope
-0.0819328	-0.180906	C: C: KEGG name	12	0.409978	0.76268	DNA replication
0.00589819	-0.100109	C: C: GOBP slim name	22	0.550974	0.762887	cell cycle
-0.151218	-0.106686	C: C: KEGG name	11	0.413645	0.763884	Lysosome
0.241011	-0.167247	C: C: KEGG name	3	0.422713	0.763903	Porphyrin and chlorophyll metabolism
0.161399	-0.235944	C: C: GOCC name	10	0.181445	0.76456	caveola
0.0829268	-0.24892	C: C: KEGG name	5	0.420426	0.765235	Glycerolipid metabolism
0.129055	-0.137261	C: C: GOCC name	22	0.178849	0.765307	envelope
0.236516	0.0222997	C: C: KEGG name	5	0.417508	0.765432	ErbB signaling pathway
-0.0814196	-0.480167	C: C: Keywords	3	0.304211	0.765433	Purinesalvage
-0.208254	-0.222809	C: C: Keywords	7	0.308512	0.767999	Carbohydratemetabolism
0.0222668	-0.0453664	C: C: Keywords	244	0.303824	0.768592	Repeat
-0.379726	-0.160288	C: C: Keywords	3	0.310472	0.768788	Heme
0.0292094	-0.228691	C: C: KEGG name	7	0.428517	0.768899	Phototransduction - fly
0.29338	0.141742	C: C: Keywords	5	0.307816	0.770363	Bromodomain
-0.187359	-0.314388	C: C: GOCC name	9	0.183532	0.770414	rough endoplasmic reticulum
-0.042743	0.0596544	C: C: GOBP slim name	29	0.560004	0.77168	mitochondrion organization
-0.0221625	0.0572314	C: C: GOBP slim name	47	0.563879	0.773319	nucleocytoplasmic transport
-0.153404	-0.235696	C: C: GOCC name	15	0.185556	0.775963	microbody
-0.440734	-0.472635	C: C: GOMF name	7	0.030671	0.778202	small GTPase regulator activity
-0.00605936	0.0621341	C: C: GOBP slim name	49	0.579411	0.779769	nuclear transport
0.666203	-0.749652	C: C: GOMF name	2	0.0304352	0.779864	UTP binding
0.123429	-0.0259253	C: C: GOBP slim name	8	0.571597	0.78019	protein glycosylation
-0.178369	-0.270107	C: C: GOMF name	31	0.0289722	0.781041	inorganic cation transmembrane transporter activity
0.173742	-0.0976572	C: C: GOBP slim name	3	0.583075	0.781049	meiotic cell cycle
-0.0727541	-0.355462	C: C: GOCC name	9	0.187673	0.781853	cortical cytoskeleton
-0.0795523	-0.197164	C: C: GOCC name	27	0.188422	0.782023	vesicle membrane
-0.08159	-0.169805	C: C: GOBP slim name	6	0.579308	0.78329	polysaccharide metabolic process
-0.178828	-0.270819	C: C: GOCC name	11	0.189712	0.784429	peroxisome
-0.0447846	-0.145961	C: C: GOMF name	157	0.0294489	0.785708	nucleoside-triphosphatase activity
-0.115477	-0.183152	C: C: GOCC name	25	0.190741	0.785738	cytoplasmic vesicle membrane
0.0792308	-0.0821504	C: C: GOCC slim name	21	0.42528	0.786476	synapse
-0.08159	-0.169805	C: C: GOBP slim name	6	0.579308	0.786984	energy reserve metabolic process
0.203626	0.00767085	C: C: KEGG name	6	0.441744	0.78705	Protein digestion and absorption
0.666203	-0.749652	C: C: GOMF name	2	0.0304352	0.787662	sulfonylurea receptor binding
0.0185126	-0.1808	C: C: GOCC slim name	11	0.437751	0.787951	transcriptional repressor complex
-0.178369	-0.270107	C: C: GOMF name	31	0.0289722	0.789263	cation transmembrane transporter activity
0.420723	0.326495	C: C: Keywords	2	0.320527	0.789509	Growthfactor
0.154248	-0.213092	C: C: GOCC slim name	4	0.433191	0.79028	mRNA cleavage factor complex
-0.0814763	-0.327298	C: C: GOCC slim name	4	0.415784	0.790574	pseudopodium
0.952017	0.639777	C: C: GOMF name	2	0.0287987	0.792883	snoRNP binding
0.434631	-0.400904	C: C: GOCC name	2	0.194707	0.793197	phosphopyruvate hydratase complex
-0.2789	-0.455606	C: C: GOCC name	4	0.194162	0.793905	pericentriolar material
0.289756	0.369199	C: C: GOCC name	5	0.193453	0.793949	CRD-mediated mRNA stability complex
-0.0353717	-0.148672	C: C: GOCC slim name	19	0.423615	0.794278	vacuole
-0.0814763	-0.398329	C: C: Keywords	4	0.324347	0.794734	Zymogen
0.666203	-0.749652	C: C: GOMF name	2	0.0304352	0.795618	pyrimidine ribonucleotide binding
0.189051	-0.342844	C: C: Keywords	3	0.32679	0.796551	Pentoseshunt
0.0881587	0.158836	C: C: GOCC slim name	14	0.413065	0.796625	polysome
-0.0327395	-0.158072	C: C: GOCC slim name	18	0.408998	0.800213	lysosome
0.417305	-0.76618	C: C: GOMF name	3	0.0287762	0.800782	pyrimidine nucleotide binding
0.114802	-0.0833612	C: C: GOCC name	34	0.197443	0.801388	nuclear chromatin
-0.0713659	0.0987535	C: C: GOCC slim name	16	0.469797	0.802818	histone methyltransferase complex
0.213157	-0.634937	C: C: GOMF name	6	0.0238865	0.802833	monocarboxylic acid binding
0.666203	-0.749652	C: C: GOMF name	2	0.0304352	0.803737	CTP binding
-0.708914	-0.0370822	C: C: GOMF name	4	0.0286026	0.804602	4 iron, 4 sulfur cluster binding
0.12546	-0.0811045	C: C: Keywords	17	0.331865	0.80473	Secreted
-0.0965867	-0.218087	C: C: GOMF name	58	0.0320454	0.80518	GTPase activity
0.0975887	0.0525296	C: C: GOCC slim name	30	0.405604	0.805244	chromosome
0.368567	-0.478442	C: C: GOCC name	2	0.199678	0.807488	photoreceptor inner segment
0.0393047	0.0473122	C: C: GOCC slim name	1349	0.478533	0.807525	cell part
-0.405028	-0.492318	C: C: GOMF name	8	0.0246533	0.807629	protein disulfide isomerase activity
0.087108	0.256307	C: C: GOCC slim name	5	0.467752	0.809571	transcription elongation factor complex
-0.081363	0.25	C: C: GOBP slim name	2	0.610047	0.809648	transcription elongation, DNA-dependent
-0.0814196	-0.318256	C: C: GOCC slim name	3	0.492615	0.811013	DNA helicase complex
-0.081363	-0.289638	C: C: GOBP slim name	2	0.608478	0.811304	behavioral interaction between organisms
-0.0700891	-0.116112	C: C: GOCC slim name	18	0.48715	0.811916	chromatin remodeling complex
-0.119653	-0.167068	C: C: GOMF name	79	0.0285814	0.812841	transporter activity
-0.081363	-0.416898	C: C: GOCC slim name	2	0.465854	0.816758	nucleotide-excision repair complex
-0.0816469	0.177151	C: C: KEGG name	7	0.464946	0.816884	Mismatch repair
-0.405028	-0.492318	C: C: GOMF name	8	0.0246533	0.817984	intramolecular oxidoreductase activity, transposing S-S bonds
0.271916	-0.640557	C: C: GOMF name	5	0.0284535	0.818196	fatty acid binding
-0.00979512	-0.170351	C: C: GOMF name	118	0.0268984	0.818978	transferase activity
0.109629	-0.325074	C: C: GOMF name	22	0.0275373	0.819156	transcription factor binding
-0.08159	-0.734077	C: C: GOMF name	6	0.0259813	0.819995	hormone receptor binding
-0.081363	-0.418985	C: C: KEGG name	2	0.463652	0.820307	Chronic myeloid leukemia
-0.0815331	-0.791777	C: C: GOMF name	5	0.028221	0.82063	nuclear hormone receptor binding
-0.0864198	-0.238082	C: C: GOMF name	54	0.0279334	0.821494	transmembrane transporter activity
0.0532311	-0.216992	C: C: GOCC slim name	6	0.463053	0.822528	brush border
0.203897	-0.931802	C: C: GOMF name	3	0.0273475	0.822968	Hsp90 protein binding
-0.0863309	-0.250101	C: C: GOMF name	50	0.026857	0.827453	substrate-specific transmembrane transporter activity
-0.0515988	-0.0576658	C: C: Keywords	102	0.343103	0.827692	Hydrolase
-0.114109	-0.198932	C: C: GOMF name	67	0.0259789	0.830041	substrate-specific transporter activity
-0.0814196	-0.30457	C: C: GOCC slim name	3	0.510609	0.830508	condensin complex
-0.718663	-0.328169	C: C: GOMF name	4	0.0257049	0.831554	GTPase activator activity
-0.273701	-0.548878	C: C: GOMF name	9	0.0267075	0.83276	intramolecular oxidoreductase activity, interconverting keto- and enol-groups
-0.0858545	-0.45567	C: C: GOMF name	14	0.0354277	0.833517	intramolecular oxidoreductase activity
0.800417	-0.486787	C: C: GOMF name	2	0.0351373	0.834269	long-chain-3-hydroxyacyl-CoA dehydrogenase activity
0.417305	-0.731849	C: C: GOMF name	3	0.0338499	0.834319	dATP binding
0.335749	-0.10662	C: C: GOCC name	5	0.208657	0.83463	aminoacyl-tRNA synthetase multienzyme complex
-0.0817039	-0.262919	C: C: Keywords	8	0.350124	0.836011	Amino-acidbiosynthesis
-0.081363	0.230529	C: C: GOBP slim name	2	0.632926	0.83616	transcription from RNA polymerase I promoter
-0.0654545	-0.533496	C: C: GOMF name	10	0.0371625	0.836318	drug binding
-0.109595	-0.149729	C: C: GOCC name	31	0.207595	0.836442	cytoplasmic vesicle part
-0.0815331	0.717909	C: C: GOMF name	5	0.0362065	0.836629	RNA cap binding
0.247559	-0.216876	C: C: GOCC name	6	0.210086	0.83731	neuron projection terminus
0.118392	-0.235702	C: C: GOCC name	11	0.211656	0.837522	cell cortex
0.0571827	-0.388889	C: C: GOCC name	6	0.208624	0.837529	myosin complex
-0.0814763	0.140494	C: C: GOBP slim name	4	0.636923	0.837598	lipid transport
0.499751	0.310936	C: C: GOMF name	7	0.0343219	0.837973	glycosaminoglycan binding
0.00912281	-0.427696	C: C: GOMF name	15	0.036593	0.838077	unfolded protein binding
0.273292	-0.23868	C: C: GOMF name	14	0.0349964	0.838617	G-protein-coupled receptor binding
0.143454	-0.431755	C: C: GOCC name	4	0.211174	0.83862	receptor complex
-0.00766527	-0.238583	C: C: GOMF name	51	0.0359855	0.839014	transferase activity, transferring phosphorus-containing groups
-0.0641958	-0.237413	C: C: Keywords	10	0.349929	0.839829	Nuclearporecomplex
0.344771	0.31606	C: C: GOMF name	12	0.0370223	0.840472	S-adenosylmethionine-dependent methyltransferase activity
-0.222769	-0.358646	C: C: GOMF name	17	0.0347882	0.84142	heat shock protein binding
0.417305	-0.731849	C: C: GOMF name	3	0.0338499	0.842341	adenyl deoxyribonucleotide binding
0.151829	-0.172067	C: C: Keywords	7	0.356316	0.846478	Dynein
-0.081363	-0.708623	C: C: GOCC name	2	0.214934	0.847452	cation channel complex
-0.391183	-0.244036	C: C: GOMF name	11	0.038052	0.848953	GTPase regulator activity
-0.08159	-0.124593	C: C: GOBP slim name	6	0.656583	0.851784	peptide metabolic process
-0.081363	0.214534	C: C: GOBP slim name	2	0.651805	0.853273	secondary metabolic process
-0.0688389	-0.00761838	C: C: GOBP slim name	18	0.656367	0.855356	endosome transport
-0.0816469	-0.199282	C: C: KEGG name	7	0.494763	0.863276	Nucleotide excision repair
-0.0815331	-0.443345	C: C: GOCC name	5	0.220668	0.863892	integral to plasma membrane
-0.254266	-0.0366434	C: C: GOCC name	10	0.220117	0.8648	cilium
0.158282	0.175313	C: C: GOCC name	17	0.222469	0.864807	Cajal body
-0.081363	0.343533	C: C: KEGG name	2	0.50362	0.866775	Homologous recombination
-0.081363	-0.38491	C: C: KEGG name	2	0.50025	0.866872	Thiamine metabolism
0.443672	-0.320932	C: C: GOCC name	2	0.222358	0.867434	catenin complex
0.0617343	-0.0347425	C: C: Keywords	67	0.367363	0.868313	Transcriptionregulation
0.0692947	-0.0243227	C: C: Keywords	61	0.369391	0.868718	Zinc
-0.081363	-0.234353	C: C: GOBP slim name	2	0.673647	0.870001	oligosaccharide metabolic process
-0.08159	-0.19549	C: C: KEGG name	6	0.533923	0.871499	Rheumatoid arthritis
-0.081363	-0.350834	C: C: KEGG name	2	0.538077	0.87265	Drug metabolism - other enzymes
0.0496746	-0.0192425	C: C: KEGG name	62	0.511709	0.874745	RNA transport
-0.0815331	-0.211847	C: C: KEGG name	5	0.542865	0.874808	Apoptosis
-0.081363	-0.228442	C: C: GOBP slim name	2	0.680627	0.875092	vacuolar transport
0.236836	-0.00695894	C: C: KEGG name	3	0.52234	0.875179	Mineral absorption
0.0377095	-0.0960196	C: C: GOBP slim name	8	0.684542	0.876214	neurotransmitter transport
-0.08159	-0.19549	C: C: KEGG name	6	0.533923	0.877158	Collecting duct acid secretion
-0.0654596	0.120648	C: C: GOBP slim name	4	0.692134	0.878126	peptide transport
-0.081761	-0.0572249	C: C: GOBP slim name	9	0.689627	0.878817	cell growth
0.0059398	-0.153059	C: C: Keywords	21	0.375693	0.879122	Protease
-0.0814196	0.125957	C: C: GOBP slim name	3	0.702305	0.879408	meiosis
0.236836	-0.00695894	C: C: KEGG name	3	0.52234	0.881014	Bile secretion
-0.0814196	-0.287868	C: C: KEGG name	3	0.532892	0.881188	Histidine metabolism
-0.081363	-0.339708	C: C: KEGG name	2	0.550665	0.881761	p53 signaling pathway
-0.0617076	-0.0428538	C: C: GOBP slim name	15	0.698223	0.881966	cell activation
-0.0955245	-0.136154	C: C: KEGG name	10	0.51983	0.882665	Long-term potentiation
-0.081363	-0.210362	C: C: GOBP slim name	2	0.70191	0.882752	protein complex biogenesis
0.0727457	0.226129	C: C: GOCC name	18	0.228286	0.884309	stress granule
-0.0492721	-0.327322	C: C: GOMF name	25	0.0445256	0.886403	translation initiation factor activity
-0.08159	-0.664226	C: C: GOMF name	6	0.04419	0.88654	oxidoreductase activity, acting on a heme group of donors, oxygen as acceptor
-0.0814196	-0.287868	C: C: KEGG name	3	0.532892	0.886985	Ascorbate and aldarate metabolism
-0.081363	-0.196453	C: C: GOBP slim name	2	0.718158	0.88768	cellular alkene metabolic process
-0.063878	-0.00129373	C: C: GOBP slim name	13	0.722516	0.889251	DNA recombination
-0.0255906	-0.073731	C: C: GOBP slim name	15	0.717949	0.891247	plasma membrane organization
-0.0577327	0.0188669	C: C: GOBP slim name	13	0.727566	0.891655	chromosome segregation
0.00237762	-0.513287	C: C: GOMF name	10	0.0410557	0.892876	actin binding
-0.08159	-0.664226	C: C: GOMF name	6	0.04419	0.893466	oxidoreductase activity, acting on a heme group of donors
-0.166395	-0.284494	C: C: GOCC name	9	0.231597	0.893999	vesicle coat
-0.0814763	-0.123607	C: C: GOBP slim name	4	0.717882	0.895022	telomere organization
-0.081363	-0.493046	C: C: Keywords	2	0.38897	0.896738	Copper
0.047846	-0.317208	C: C: GOMF name	24	0.040925	0.897575	lyase activity
-0.08159	-0.664226	C: C: GOMF name	6	0.04419	0.900501	heme-copper terminal oxidase activity
-0.130505	-0.137189	C: C: Keywords	13	0.388958	0.901151	Mitosis
-0.180682	-0.112121	C: C: Keywords	9	0.387071	0.90124	Postsynapticcellmembrane
0.165398	0.425616	C: C: GOMF name	14	0.0407719	0.901861	transcription corepressor activity
-0.0814763	-0.228064	C: C: GOCC slim name	4	0.561258	0.902022	respiratory chain complex III
-0.0814196	0.223382	C: C: GOCC slim name	3	0.5684	0.902753	DNA replication factor C complex
-0.0814763	-0.813719	C: C: GOMF name	4	0.0436602	0.903941	actin filament binding
-0.359313	-0.908606	C: C: GOMF name	3	0.0419244	0.904169	hydroxymethyl-, formyl- and related transferase activity
-0.155214	-0.540492	C: C: GOMF name	9	0.0424148	0.907187	translation elongation factor activity
-0.0814763	-0.217096	C: C: GOCC slim name	4	0.578107	0.907494	F-actin capping protein complex
-0.08159	-0.664226	C: C: GOMF name	6	0.04419	0.907648	cytochrome-c oxidase activity
0.404457	0.309651	C: C: GOMF name	9	0.0436259	0.910515	chromatin DNA binding
-0.915855	-0.448192	C: C: GOMF name	2	0.0432953	0.91096	Rab GDP-dissociation inhibitor activity
-0.886648	-0.576495	C: C: GOMF name	2	0.042975	0.911634	misfolded protein binding
0.0462576	0.278475	C: C: Keywords	6	0.400014	0.917678	Centromere
-0.0816469	-0.251022	C: C: Keywords	7	0.402213	0.918224	ANKrepeat
0.0632939	0.00867595	C: C: Keywords	74	0.417045	0.920647	Transcription
0.217815	-0.413825	C: C: GOCC name	3	0.243806	0.921787	spectrin
-0.521558	0.0246871	C: C: GOCC name	2	0.248116	0.922291	NURF complex
0.0765157	-0.0423693	C: C: GOBP slim name	5	0.755919	0.922478	organic acid transport
-0.174581	-0.138443	C: C: Keywords	8	0.408292	0.923094	Rotamase
-0.10658	-0.0565266	C: C: Keywords	24	0.416296	0.923349	DNArepair
0.306407	0.355153	C: C: GOCC name	4	0.240241	0.924134	polysomal ribosome
0.217815	-0.413825	C: C: GOCC name	3	0.243806	0.924955	cuticular plate
0.189607	0.00539853	C: C: GOCC name	16	0.243001	0.925079	condensed chromosome
-0.521558	0.0246871	C: C: GOCC name	2	0.248116	0.925407	ISWI complex
-0.0814196	-0.385989	C: C: Keywords	3	0.407846	0.926562	Glutamineamidotransferase
-0.0724332	-0.144202	C: C: Keywords	18	0.412086	0.927193	Translocation
-0.310237	-0.340007	C: C: GOCC name	4	0.246122	0.927366	proteasome regulatory particle
-0.10658	-0.0565266	C: C: Keywords	24	0.416296	0.927746	DNAdamage
0.0638422	-0.239846	C: C: GOCC name	12	0.24708	0.927811	secretory granule membrane
0.214069	-0.119419	C: C: GOCC name	9	0.242918	0.927964	cleavage furrow
-0.514604	-0.30146	C: C: GOCC name	2	0.247995	0.928089	endoplasmic reticulum tubular network
-0.179743	0.0710797	C: C: Keywords	7	0.414568	0.928314	Hydroxylation
-0.0815331	-0.0583972	C: C: GOBP slim name	5	0.765245	0.929917	developmental maturation
0.214069	-0.119419	C: C: GOCC name	9	0.242918	0.931187	cell division site part
-0.514604	0.0222531	C: C: GOCC name	2	0.254841	0.931604	insulin-responsive compartment
-0.523644	-0.0340751	C: C: GOCC name	2	0.254163	0.932214	perichromatin fibrils
-0.527121	-0.196801	C: C: GOCC name	2	0.252604	0.932691	unconventional myosin complex
0.00192107	-0.138154	C: C: GOCC name	44	0.254054	0.934917	synapse part
-0.081363	0.616134	C: C: GOCC name	2	0.2524	0.935066	intercellular canaliculus
-0.19031	-0.101386	C: C: Keywords	7	0.430164	0.936358	Coatedpit
-0.081363	-0.452017	C: C: Keywords	2	0.429479	0.939234	Irontransport
-0.211762	-0.073338	C: C: Keywords	6	0.427858	0.940082	Leucine-richrepeat
-0.081363	-0.643255	C: C: GOCC name	2	0.260651	0.940388	nonhomologous end joining complex
-0.638135	-0.624913	C: C: GOMF name	3	0.0477201	0.942746	GDP-dissociation inhibitor activity
-0.00856065	-0.190145	C: C: GOCC name	23	0.258823	0.943037	coated vesicle
-0.081363	-0.643255	C: C: GOCC name	2	0.260651	0.943471	Ku70:Ku80 complex
0.294514	-0.0104603	C: C: GOCC name	6	0.260337	0.945433	nuclear heterochromatin
0.125553	-0.222067	C: C: GOCC name	9	0.268038	0.951492	lateral plasma membrane
0.0459099	0.0367144	C: C: GOCC name	249	0.267416	0.952347	nucleoplasm
0.121159	-0.247294	C: C: GOCC name	8	0.266974	0.953848	cell periphery
-0.0817039	-0.211505	C: C: Keywords	8	0.442432	0.954185	Lysosome
-0.0814196	0.315472	C: C: Keywords	3	0.44718	0.955618	Prolinebiosynthesis
0.310848	-0.132476	C: C: Keywords	2	0.445172	0.955691	SH3-binding
-0.132739	-0.0648167	C: C: Keywords	14	0.441218	0.955973	Chromatinregulator
-0.08159	-0.365993	C: C: GOCC name	6	0.266848	0.956494	intrinsic to plasma membrane
-0.0815331	-0.40223	C: C: GOCC name	5	0.266011	0.9566	retromer complex
0.103657	-0.239848	C: C: GOCC name	9	0.270405	0.956816	cell leading edge
0.014482	-0.19597	C: C: GOCC name	19	0.274963	0.957598	lytic vacuole
0.218118	-0.595122	C: C: GOMF name	5	0.0492515	0.958367	deoxyribonucleotide binding
0.0389701	-0.407483	C: C: GOMF name	14	0.0488955	0.958648	tubulin binding
0.0767944	0.396794	C: C: GOCC name	5	0.272836	0.95927	mRNA cap binding complex
-0.149158	-0.263996	C: C: GOCC name	9	0.271971	0.959285	proton-transporting two-sector ATPase complex, proton-transporting domain
-0.081363	-0.625869	C: C: GOCC name	2	0.273844	0.959757	flotillin complex
0.869958	0.478442	C: C: GOMF name	2	0.0522914	0.959789	histone pre-mRNA DCP binding
0.014482	-0.19597	C: C: GOCC name	19	0.274963	0.960629	lysosome
-0.0703833	-0.17993	C: C: KEGG name	5	0.604533	0.96193	Proximal tubule bicarbonate reclamation
-0.074279	-0.286927	C: C: GOMF name	30	0.0521331	0.963718	isomerase activity
-0.279649	-0.236286	C: C: GOMF name	17	0.0499318	0.964355	enzyme activator activity
-0.0814763	-0.196031	C: C: KEGG name	4	0.610556	0.965441	Base excision repair
-0.081761	-0.19163	C: C: Keywords	9	0.454034	0.965853	Endocytosis
-0.902643	-0.179764	C: C: GOMF name	2	0.0511909	0.967021	isocitrate dehydrogenase activity
0.427374	0.275052	C: C: GOMF name	8	0.0519552	0.967339	polysaccharide binding
0.427677	-0.218707	C: C: GOCC name	2	0.278652	0.967396	chromatoid body
0.403338	-0.869263	C: C: GOMF name	2	0.0540098	0.970676	small protein activating enzyme activity
-0.269499	-0.765843	C: C: GOMF name	4	0.0510165	0.970814	phosphotransferase activity, nitrogenous group as acceptor
0.893602	0.192629	C: C: GOMF name	2	0.0536484	0.970923	DNA topoisomerase activity
0.427374	0.275052	C: C: GOMF name	8	0.0519552	0.974349	pattern binding
0.639991	0.596613	C: C: GOMF name	3	0.0509502	0.976733	complement binding
0.893602	0.192629	C: C: GOMF name	2	0.0536484	0.977761	DNA topoisomerase (ATP-hydrolyzing) activity
-0.376015	-0.275342	C: C: GOCC name	3	0.283298	0.980444	pyruvate dehydrogenase complex
-0.388077	0.0484806	C: C: GOCC name	3	0.285137	0.980658	early endosome membrane
-0.0367207	-0.170846	C: C: GOCC name	26	0.284397	0.981168	axon
-0.00489511	-0.0611189	C: C: GOBP slim name	10	0.811056	0.981446	protein dephosphorylation
-0.081363	0.230529	C: C: GOCC slim name	2	0.632926	0.982127	RNA polymerase complex
0.157382	0.000348189	C: C: KEGG name	4	0.625441	0.982835	Aldosterone-regulated sodium reabsorption
-0.08159	0.0937936	C: C: GOCC slim name	6	0.644089	0.98809	RNAi effector complex
-0.081363	0.230529	C: C: KEGG name	2	0.632926	0.988459	RNA polymerase
0.159634	-0.0054696	C: C: GOCC name	18	0.29281	0.988569	nuclear chromosome
-0.081363	0.559805	C: C: GOCC name	2	0.295821	0.989657	MutSalpha complex
0.231269	-0.126421	C: C: Keywords	3	0.467544	0.990094	Proto-oncogene
0.100707	0.0427052	C: C: KEGG name	9	0.64205	0.99048	N-Glycan biosynthesis
-0.442976	-0.355007	C: C: GOCC name	2	0.291745	0.991035	extrinsic to organelle membrane
-0.123332	-0.176571	C: C: GOCC name	16	0.292791	0.991539	nuclear pore
-0.081363	0.559805	C: C: GOCC name	2	0.295821	0.992665	mismatch repair complex
0.176525	0.0222686	C: C: KEGG name	3	0.640016	0.993399	Steroid biosynthesis
0.0730626	-0.2088	C: C: GOCC name	12	0.291601	0.993604	intercalated disc
0.0551031	-0.178455	C: C: GOCC name	17	0.295271	0.99384	postsynaptic density
-0.0814196	-0.193227	C: C: GOCC slim name	3	0.662971	0.994456	Sec61 translocon complex
0.0874738	0.00604364	C: C: GOCC slim name	11	0.656415	0.995686	transcription factor complex
0.0536901	-0.0413496	C: C: GOCC name	106	0.291426	0.996083	chromosomal part
0.340751	-0.332058	C: C: GOCC name	2	0.299066	0.997488	mast cell granule
-0.20967	-0.279754	C: C: GOCC name	6	0.291054	0.997899	cell projection cytoplasm
-0.0787413	-0.0657343	C: C: GOCC slim name	10	0.672873	0.998218	ubiquitin ligase complex
0	0	C: C: GOMF name	0	1	1	zinc ion transmembrane transporter activity
0	0	C: C: GOBP slim name	0	1	1	xenobiotic transport
0	0	C: C: GOCC slim name	0	1	1	voltage-gated calcium channel complex
0	0	C: C: KEGG name	0	1	1	Vitamin digestion and absorption
0	0	C: C: Keywords	0	1	1	Zinctransport
0	0	C: C: GOCC name	1	1	1	Y chromosome

## Sheet: Table S2B PR
Table S2B: Enrichment of gene ontology (GO) terms in the (PR)175-GFP interactors in primary neurons and HEK293 cells
PR vs GFP_neurons vs_HEK
Neurons: 1D SCORE of Welch's T-test Difference LFQ intensity pPR_LFQ intensity GFP s0=1, fdr=5%	HEK293: 1D SCORE of Welch's T-test Difference HEK_PR vs Hek GFP Welch FDR 5%, S0=1, 66% vv	C: Type	N: Size	N: P value	N: Benj. Hoch. FDR	T: Names
0.106348	0.344047	C: C: GOCC slim name	349	5.82e-14	7.85e-12	ribonucleoprotein complex
0.111357	0.338864	C: C: GOCC name	351	8.95e-14	9.88e-11	ribonucleoprotein complex
-0.0557738	0.477115	C: C: Keywords	142	5.93e-13	2.78e-10	Ribosomalprotein
0.0636379	0.412884	C: C: Keywords	190	6.47e-12	1.51e-09	Ribonucleoprotein
-0.104331	0.420073	C: C: GOBP slim name	122	7.01e-10	2.02e-07	translation
-0.0869987	0.446611	C: C: GOMF name	123	1.1e-10	2.86e-07	structural constituent of ribosome
-0.00366019	0.46514	C: C: GOCC slim name	101	5.8e-09	3.91e-07	ribosome
-0.0504346	0.456475	C: C: GOCC name	109	1.4e-09	7.7e-07	ribosome
-0.0292621	-0.249034	C: C: GOCC slim name	442	2.31e-08	1.04e-06	vesicle
0.386295	0.305104	C: C: KEGG name	75	8.99e-09	2.28e-06	Spliceosome
-0.0207237	-0.247947	C: C: GOCC name	461	1.86e-08	6.84e-06	vesicle
0.34654	0.266403	C: C: GOCC slim name	75	3.38e-07	1.14e-05	spliceosomal complex
-0.019407	-0.241652	C: C: GOCC name	456	4.73e-08	1.31e-05	membrane-bounded vesicle
-0.0284869	-0.230248	C: C: GOCC slim name	403	5.33e-07	1.44e-05	extracellular organelle
-0.249724	0.323621	C: C: KEGG name	80	2.01e-07	2.54e-05	Ribosome
-0.45937	0.400099	C: C: GOCC name	33	1.62e-07	2.99e-05	cytosolic small ribosomal subunit
0.424303	0.397262	C: C: GOCC name	46	1.43e-07	3.15e-05	catalytic step 2 spliceosome
0.34654	0.266403	C: C: GOCC name	75	3.38e-07	3.73e-05	spliceosomal complex
-0.0164173	-0.231618	C: C: GOCC name	421	3.23e-07	3.96e-05	extracellular vesicular exosome
-0.0164173	-0.231618	C: C: GOCC name	421	3.23e-07	4.46e-05	extracellular organelle
-0.0164173	-0.231618	C: C: GOCC name	421	3.23e-07	5.09e-05	extracellular membrane-bounded organelle
-0.311604	0.354615	C: C: GOCC slim name	47	2.58e-06	5.81e-05	small ribosomal subunit
-0.311604	0.354615	C: C: GOCC name	47	2.58e-06	0.000259283	small ribosomal subunit
-0.0141919	-0.226225	C: C: GOMF name	486	2.08e-07	0.000269542	catalytic activity
-0.0131788	-0.203496	C: C: GOCC name	444	5.47e-06	0.000502909	extracellular region part
0.695064	0.147883	C: C: GOCC slim name	15	3.86e-05	0.000743629	nucleosome
0.0244651	0.178424	C: C: GOCC slim name	429	8.08e-05	0.00136369	intracellular non-membrane-bounded organelle
-0.113317	0.2552	C: C: GOMF name	172	1.84e-06	0.00158383	structural molecule activity
0.0212987	0.189589	C: C: GOCC name	443	2.37e-05	0.00187211	non-membrane-bounded organelle
0.0212987	0.189589	C: C: GOCC name	443	2.37e-05	0.00201612	intracellular non-membrane-bounded organelle
-0.00567153	-0.163557	C: C: GOCC slim name	495	0.000175629	0.00263444	protein complex
0.695064	0.147883	C: C: GOCC name	15	3.86e-05	0.00283791	nucleosome
-0.0402032	-0.207654	C: C: GOCC name	280	6.44e-05	0.00444552	membrane part
0.178376	0.0545169	C: C: stress granule (Jain et al., 2016)	114	0.00481412	0.00481412	stress granules
0.000758445	-0.151403	C: C: GOCC slim name	549	0.000364986	0.00492731	membrane
0.646419	0.0938378	C: C: GOCC name	16	8.15e-05	0.0052911	protein-DNA complex
-0.0113958	-0.170275	C: C: GOCC name	499	9.28e-05	0.00569458	protein complex
0.338636	0.474412	C: C: GOCC slim name	21	0.00059454	0.00729663	small nuclear ribonucleoprotein complex
0.637465	0.132549	C: C: KEGG name	16	9.91e-05	0.00836164	Systemic lupus erythematosus
-0.0670857	-0.212248	C: C: Keywords	251	5.6e-05	0.00873793	Nucleotide-binding
-0.131257	-0.233928	C: C: GOCC slim name	97	0.00115547	0.0119991	cytoplasmic membrane-bounded vesicle
-0.969059	0.457561	C: C: GOCC name	5	0.000211295	0.0122774	neurofilament
-0.0516616	0.187565	C: C: GOCC slim name	179	0.00113483	0.0127668	nucleolus
0.616783	0.611189	C: C: GOCC name	10	0.000249035	0.0137467	exon-exon junction complex
0.265645	0.244401	C: C: Keywords	63	0.000155666	0.0182129	mRNAsplicing
0.154134	0.166431	C: C: GOBP slim name	172	0.000211052	0.020261	RNA processing
-0.13834	-0.246095	C: C: GOCC name	103	0.000431246	0.0226712	cytoplasmic vesicle
0.204039	0.176682	C: C: GOBP slim name	112	0.000194742	0.0280428	mRNA metabolic process
0.338636	0.474412	C: C: GOCC name	21	0.00059454	0.0298351	small nuclear ribonucleoprotein complex
0.177675	0.155497	C: C: Keywords	137	0.000364685	0.0341345	RNA-binding
0.414332	0.632236	C: C: GOCC name	12	0.000794275	0.0350752	organellar large ribosomal subunit
0.235108	0.211165	C: C: Keywords	69	0.000536022	0.0358369	mRNAprocessing
0.414332	0.632236	C: C: GOCC name	12	0.000794275	0.0365367	mitochondrial large ribosomal subunit
-0.0459575	-0.159936	C: C: Keywords	382	0.000471946	0.0368118	Directproteinsequencing
-0.0474592	0.194034	C: C: GOCC name	184	0.00077167	0.0370402	nucleolus
-0.0290699	-0.198747	C: C: GOCC slim name	146	0.00386096	0.0372306	plasma membrane
-0.00976797	-0.140879	C: C: GOCC name	564	0.000934743	0.0396906	membrane
0.0757244	0.0838907	C: C: GOCC slim name	783	0.00480897	0.0432807	macromolecular complex
0.219285	0.205105	C: C: GOBP slim name	76	0.000607418	0.0437341	RNA splicing
0.119745	0.116238	C: C: GOBP slim name	278	0.000809164	0.0466078	RNA metabolic process
-0.139953	-0.223418	C: C: GOCC name	98	0.00123758	0.0487959	cytoplasmic membrane-bounded vesicle
-0.566385	0.127594	C: C: GOCC name	13	0.00119523	0.0488715	intermediate filament
0.20186	0.158757	C: C: GOBP slim name	90	0.00123287	0.0507237	mRNA processing
0.709437	0.667132	C: C: GOCC name	6	0.0013788	0.0524893	U4 snRNP
-0.0419835	-0.125989	C: C: GOBP slim name	637	0.00170139	0.0544446	biological regulation
-0.0223325	-0.209819	C: C: GOBP slim name	169	0.00115767	0.055568	small molecule metabolic process
-0.679168	0.199161	C: C: Keywords	9	0.000994505	0.0581786	Intermediatefilament
0.667133	0.0174825	C: C: Keywords	10	0.00126152	0.0590393	Nucleosomecore
0.523275	0.192234	C: C: GOCC name	15	0.00168954	0.0601696	virion part
-0.0541765	-0.195939	C: C: GOBP slim name	173	0.0016819	0.0605484	anatomical structure development
0.523275	0.192234	C: C: GOCC name	15	0.00168954	0.0621753	viral nucleocapsid
0.339827	0.172445	C: C: Keywords	35	0.00146536	0.0623443	Spliceosome
0.000866066	-0.130651	C: C: GOCC name	847	0.00185541	0.0640115	membrane-bounded organelle
-0.0661587	-0.190054	C: C: GOMF name	271	0.000175284	0.064805	ribonucleotide binding
0.0475269	-0.230141	C: C: Keywords	118	0.00125797	0.0654143	Ublconjugation
0.00799444	-0.168921	C: C: GOCC slim name	170	0.00798431	0.0673676	cytosol
-0.0654959	-0.188102	C: C: GOMF name	268	0.000218063	0.0705432	purine ribonucleoside triphosphate binding
-0.0206458	-0.202152	C: C: GOMF name	282	0.000109657	0.070948	protein binding
-0.0702458	-0.190155	C: C: GOMF name	275	0.000141784	0.0733876	purine nucleotide binding
-0.165115	-0.236805	C: C: Keywords	73	0.00191346	0.074625	GTP-binding
-0.0661587	-0.190054	C: C: GOMF name	271	0.000175284	0.0756058	purine ribonucleotide binding
-0.0351176	-0.259834	C: C: GOCC name	91	0.00233617	0.0758569	plasma membrane part
0.132849	0.131063	C: C: GOMF name	260	0.000264107	0.0759454	RNA binding
0.00876974	-0.190343	C: C: GOCC name	178	0.00227409	0.0760788	cytosol
0.146223	0.25283	C: C: GOBP slim name	68	0.00272652	0.0785239	ribonucleoprotein complex assembly
0.030965	-0.107413	C: C: GOCC slim name	408	0.0106118	0.0842699	cytoplasm
0.469432	0.49895	C: C: GOCC name	11	0.0026849	0.0846894	U1 snRNP
-0.850487	0.844228	C: C: GOCC slim name	2	0.0120465	0.0903491	tricarboxylic acid cycle enzyme complex
0.0207314	-0.774827	C: C: GOCC name	9	0.00304175	0.0932803	proteasome regulatory particle, base subcomplex
-0.0527139	-0.44505	C: C: Keywords	29	0.00263969	0.0950289	NAD
-0.592004	-0.601344	C: C: KEGG name	8	0.00150983	0.0954971	Renal cell carcinoma
-0.0364731	-0.161199	C: C: Keywords	251	0.00288737	0.0965206	Membrane
-0.303641	-0.48574	C: C: KEGG name	18	0.00197154	0.0997597	Leukocyte transendothelial migration
0.49124	0.300846	C: C: Keywords	13	0.00371007	0.102136	Virion
0.117385	0.0984161	C: C: GOMF name	399	0.000395119	0.102257	nucleic acid binding
-0.00663829	-0.135795	C: C: Keywords	402	0.0033815	0.105503	Cytoplasm
0.49124	0.300846	C: C: Keywords	13	0.00371007	0.108519	Viralnucleoprotein
0.42493	0.666114	C: C: Keywords	8	0.00427364	0.111115	Nonsense-mediatedmRNAdecay
-0.0349676	-0.124175	C: C: GOBP slim name	418	0.00543706	0.111848	response to stimulus
-0.0893962	-0.222213	C: C: GOBP slim name	88	0.0062491	0.112484	protein complex assembly
-0.0305626	-0.197261	C: C: GOCC name	149	0.00377979	0.112781	plasma membrane
-0.034401	-0.148083	C: C: GOBP slim name	253	0.00601312	0.115452	response to chemical stimulus
-0.0218758	-0.249973	C: C: GOBP slim name	82	0.00539522	0.119525	organic acid metabolic process
0.0236332	-0.144451	C: C: GOMF name	935	0.000519195	0.122152	binding
-0.124856	-0.416608	C: C: GOCC slim name	19	0.0185763	0.12539	midbody
-0.0618729	-0.12439	C: C: GOBP slim name	326	0.00526887	0.126453	developmental process
-0.0189341	-0.499499	C: C: GOCC slim name	14	0.0184726	0.131253	proteasome complex
-0.0218758	-0.251931	C: C: GOBP slim name	82	0.00504083	0.131978	cellular ketone metabolic process
0.911212	0.31929	C: C: GOCC name	4	0.00473809	0.137654	box C/D snoRNP complex
-0.00181641	-0.183901	C: C: GOCC name	160	0.00528901	0.14972	cytoskeletal part
0.145996	0.241967	C: C: GOCC name	61	0.0058068	0.156359	nuclear body
-0.320707	0.168933	C: C: GOCC name	25	0.00568429	0.156886	cytosolic large ribosomal subunit
0.900719	0.728601	C: C: GOCC name	3	0.00627015	0.157324	dense fibrillar component
0.91974	0.691023	C: C: GOCC name	3	0.00623025	0.159958	U5 snRNP
0.0873909	-0.248389	C: C: GOBP slim name	55	0.00954815	0.161757	carbohydrate metabolic process
-0.0396031	0.324549	C: C: GOCC name	43	0.00617038	0.162193	large ribosomal subunit
0.473464	-0.42912	C: C: Keywords	8	0.00708346	0.174477	Fattyacidmetabolism
-0.112155	-0.133227	C: C: GOBP slim name	136	0.0113408	0.181452	protein transport
-0.114765	-0.528705	C: C: GOBP slim name	13	0.015166	0.181992	protein polymerization
0.306863	0.0169567	C: C: Keywords	32	0.00870826	0.185248	Chromosome
-0.0251771	-0.348646	C: C: GOBP slim name	33	0.0122618	0.185863	cell motility
-0.197541	-0.303799	C: C: GOBP slim name	28	0.0149003	0.186577	regulation of DNA metabolic process
-0.178107	-0.209873	C: C: Keywords	56	0.0080839	0.189163	Lipoprotein
-0.289589	-0.373727	C: C: GOBP slim name	16	0.0144859	0.189634	cell junction organization
1	0.961057	C: C: Keywords	2	0.00870128	0.193914	Complementpathway
-0.102912	-0.161401	C: C: GOBP slim name	110	0.0134742	0.194029	multicellular organismal process
-0.177622	-0.52028	C: C: GOCC slim name	10	0.0302516	0.194475	lipid particle
0.0746225	0.0744453	C: C: GOCC name	789	0.00794232	0.194851	macromolecular complex
-0.122949	-0.244125	C: C: GOBP slim name	52	0.0144356	0.197974	cellular amino acid metabolic process
-0.137595	-0.259097	C: C: GOMF name	82	0.00104898	0.208827	guanyl ribonucleotide binding
0.59764	0.561301	C: C: GOMF name	9	0.000978175	0.21096	chromatin DNA binding
0.218668	0.263101	C: C: GOCC name	35	0.00887876	0.21309	nuclear speck
-0.137182	-0.254504	C: C: GOMF name	83	0.00115347	0.213227	guanyl nucleotide binding
0.744375	-0.232197	C: C: GOCC slim name	3	0.036535	0.214445	pyruvate dehydrogenase complex
0.0279099	-0.137366	C: C: GOMF name	422	0.00142101	0.216328	nucleotide binding
-0.033797	-0.175542	C: C: GOMF name	247	0.00133843	0.216491	hydrolase activity
0.0983838	0.0255237	C: C: Keywords	368	0.0125029	0.216717	Nucleus
-0.0584308	-0.347333	C: C: Keywords	33	0.0122103	0.219786	Calcium
-0.182389	-0.202501	C: C: GOCC slim name	35	0.0359142	0.220383	endosome
0.962448	-0.665508	C: C: Keywords	2	0.0119336	0.223397	Wntsignalingpathway
-0.0220328	0.111355	C: C: GOBP slim name	314	0.0195027	0.224671	biosynthetic process
0.0306533	-0.0976807	C: C: Keywords	554	0.0111171	0.226209	Phosphoprotein
-0.0953889	-0.301975	C: C: GOBP slim name	33	0.0245857	0.228409	cell adhesion
0.0494705	-0.071057	C: C: GOCC slim name	365	0.0407087	0.228986	nucleus
0.371334	0.236593	C: C: GOCC slim name	11	0.0424211	0.229074	small nucleolar ribonucleoprotein complex
-0.138019	-0.253391	C: C: GOMF name	81	0.00133708	0.230692	GTP binding
-0.104671	-0.230426	C: C: GOBP slim name	54	0.0216383	0.230808	amine metabolic process
0.0424548	-0.21866	C: C: GOBP slim name	63	0.0233033	0.231426	regulation of protein modification process
0.740599	-0.342618	C: C: Keywords	4	0.0118738	0.231539	Pyruvate
-0.261919	-0.0404839	C: C: Keywords	39	0.013875	0.23191	Golgiapparatus
-0.0187504	-0.161326	C: C: GOBP slim name	142	0.020965	0.232228	catabolic process
-0.0719184	0.0641761	C: C: GOBP slim name	321	0.022916	0.235708	protein metabolic process
-0.0953889	-0.301975	C: C: GOBP slim name	33	0.0245857	0.236022	biological adhesion
-0.410901	-0.249357	C: C: KEGG name	15	0.00934884	0.236526	MAPK signaling pathway
-0.164263	0.00880559	C: C: GOCC slim name	65	0.0461645	0.2397	Golgi apparatus
0.148743	-0.672311	C: C: GOCC name	8	0.0103735	0.243666	proteasome accessory complex
0.0202151	-0.0957546	C: C: Keywords	634	0.0152018	0.245326	Acetylation
0.0272104	-0.108387	C: C: GOCC name	414	0.0108571	0.249714	cytoplasm
-0.144547	-0.25368	C: C: GOBP slim name	36	0.0279059	0.251153	cell development
-0.343561	-0.512785	C: C: GOCC slim name	6	0.0527932	0.254539	apical part of cell
-0.181727	-0.529203	C: C: KEGG name	14	0.0090882	0.25548	Chemokine signaling pathway
0.0822204	0.0320109	C: C: GOBP slim name	399	0.0294773	0.257257	nucleobase-containing compound metabolic process
0.264494	-0.143147	C: C: GOCC slim name	18	0.051644	0.25822	nuclear chromosome
-0.850487	0.844228	C: C: GOCC name	2	0.0120465	0.260772	tricarboxylic acid cycle enzyme complex
-0.129853	-0.135055	C: C: GOBP slim name	80	0.0308042	0.260929	vesicle-mediated transport
0.366574	-0.582985	C: C: Keywords	6	0.0168908	0.263497	Transducer
-0.111703	-0.142232	C: C: GOCC slim name	69	0.0566993	0.263945	cell body
-0.128007	-0.399573	C: C: GOMF name	36	0.00183855	0.264342	cofactor binding
-0.850487	0.844228	C: C: GOCC name	2	0.0120465	0.265988	mitochondrial tricarboxylic acid cycle enzyme complex
0.962448	-0.665508	C: C: GOCC name	2	0.0119336	0.268872	protein kinase CK2 complex
-0.290634	-0.345951	C: C: KEGG name	20	0.00856237	0.270785	Focal adhesion
0.962448	-0.665508	C: C: KEGG name	2	0.0119336	0.274473	Circadian rhythm - plant
0.0288662	0.0853258	C: C: GOBP slim name	616	0.0344589	0.275672	macromolecule metabolic process
-0.0803132	-0.171961	C: C: GOBP slim name	84	0.0335137	0.275769	cytoskeleton organization
0.0641403	-0.529544	C: C: KEGG name	15	0.00771755	0.278934	Gap junction
-0.0662209	-0.21432	C: C: GOBP slim name	58	0.0365289	0.284333	cellular component movement
-0.0524429	-0.262186	C: C: Keywords	51	0.0189822	0.28657	Oxidoreductase
-0.0718296	-0.384922	C: C: Keywords	23	0.0197404	0.288703	Proteasome
-0.0111107	-0.149268	C: C: Keywords	171	0.02051	0.290869	ATP-binding
-0.0818919	-0.490129	C: C: KEGG name	19	0.00698316	0.294457	Pathogenic Escherichia coli infection
-0.0964556	-0.1306	C: C: GOBP slim name	103	0.0399826	0.303026	anatomical structure morphogenesis
-0.0898329	-0.808148	C: C: GOBP slim name	4	0.0413552	0.305392	vitamin metabolic process
0.218246	-0.53586	C: C: GOMF name	15	0.00226774	0.30889	carboxylic acid binding
-0.0626425	-0.234373	C: C: GOBP slim name	43	0.050431	0.309024	proteolysis involved in cellular protein catabolic process
0.371334	-0.0968891	C: C: GOBP slim name	11	0.0493968	0.309267	RNA modification
0.237277	0.212552	C: C: KEGG name	33	0.0147678	0.311354	mRNA surveillance pathway
0.346899	0.599442	C: C: GOBP slim name	5	0.0493346	0.315742	ribosome assembly
-0.0188124	-0.213178	C: C: GOBP slim name	57	0.0463081	0.317541	nucleotide metabolic process
0.104468	0.0839486	C: C: GOBP slim name	128	0.0487005	0.318767	cellular macromolecular complex assembly
-0.0426668	-0.209953	C: C: GOBP slim name	58	0.0457471	0.321345	regulation of cell cycle
-0.163071	-0.105841	C: C: Keywords	73	0.0241535	0.322967	Proteintransport
0.0154641	-0.161262	C: C: GOBP slim name	99	0.044986	0.323899	response to endogenous stimulus
-0.052185	-0.265146	C: C: GOBP slim name	33	0.0551284	0.32402	protein modification by small protein conjugation or removal
-0.0473806	-0.234365	C: C: GOBP slim name	42	0.0564007	0.324868	locomotion
0.148394	0.540154	C: C: GOBP slim name	8	0.0485266	0.325016	translational elongation
0.167211	0.024947	C: C: Keywords	82	0.0250214	0.325278	DNA-binding
-0.047816	-0.19242	C: C: GOBP slim name	53	0.0770351	0.326266	proteolysis
0.214749	-0.225249	C: C: GOBP slim name	17	0.0601655	0.326937	response to heat
0.127825	0.267979	C: C: GOBP slim name	24	0.0692499	0.32695	RNA catabolic process
-0.0770956	-0.14693	C: C: GOBP slim name	80	0.0681461	0.327101	membrane organization
-0.241533	-0.61115	C: C: GOBP slim name	5	0.0661088	0.328264	molting cycle
0.0712304	0.017377	C: C: GOBP slim name	425	0.0593167	0.328523	cellular nitrogen compound metabolic process
0.0236705	0.171595	C: C: GOBP slim name	70	0.0764988	0.328831	regulation of translation
-0.120605	-0.228649	C: C: GOBP slim name	32	0.0673704	0.328859	secretion
-0.201763	-0.336005	C: C: GOBP slim name	14	0.0630031	0.329907	establishment or maintenance of cell polarity
-0.110958	-0.115333	C: C: GOBP slim name	87	0.0551154	0.330692	homeostatic process
-0.662604	-0.587918	C: C: KEGG name	4	0.0170029	0.330903	VEGF signaling pathway
0.219385	-0.0406901	C: C: GOBP slim name	29	0.0656038	0.331472	mitochondrion organization
-0.063126	0.4835	C: C: GOBP slim name	9	0.0587562	0.3318	transcription from RNA polymerase II promoter
0.0852744	-0.172916	C: C: GOBP slim name	47	0.0714706	0.331993	ion transport
-0.245335	-0.122793	C: C: Keywords	34	0.0241359	0.332224	Prenylation
0.394993	-0.805981	C: C: GOCC slim name	2	0.0788093	0.332477	photoreceptor inner segment
-0.293287	-0.12524	C: C: GOBP slim name	15	0.0763223	0.333043	Golgi organization
0.0704402	0.014574	C: C: GOBP slim name	427	0.0624909	0.333285	nitrogen compound metabolic process
-0.240415	-0.117515	C: C: GOBP slim name	22	0.0753299	0.333769	histone modification
-0.294877	0.0174503	C: C: GOBP slim name	15	0.0799729	0.3338	cytoskeleton-dependent intracellular transport
-0.0768143	-0.14484	C: C: GOBP slim name	79	0.0730642	0.334008	cellular membrane organization
0.0705874	0.18449	C: C: GOBP slim name	58	0.0650173	0.334375	rRNA processing
-0.0404643	-0.381321	C: C: GOMF name	40	0.00258959	0.335093	identical protein binding
0.232056	-0.533937	C: C: GOBP slim name	5	0.0745942	0.335674	detection of stimulus
-0.0898329	-0.878134	C: C: Keywords	4	0.0266249	0.336769	Nucleotidemetabolism
0.0611344	-0.555323	C: C: GOCC slim name	6	0.0778364	0.338965	microvillus
-0.565148	-0.053235	C: C: KEGG name	7	0.0229528	0.341591	Amyotrophic lateral sclerosis (ALS)
0.298036	-0.289471	C: C: KEGG name	14	0.0216538	0.342401	Wnt signaling pathway
0.0480233	-0.174778	C: C: GOCC slim name	56	0.0767608	0.345424	microtubule organizing center
0.88178	0.66064	C: C: Keywords	2	0.0325784	0.346516	Topoisomerase
0.331497	-0.196253	C: C: Keywords	14	0.0281435	0.34661	Calmodulin-binding
-0.27292	-0.192012	C: C: Keywords	22	0.0318881	0.347061	ER-Golgitransport
0.256536	-0.369953	C: C: KEGG name	13	0.020653	0.348348	Vasopressin-regulated water reabsorption
-0.388966	-0.436976	C: C: Keywords	8	0.0298964	0.349788	Flavoprotein
0.366159	-0.0764376	C: C: Keywords	14	0.030896	0.352667	Biologicalrhythms
0.520761	-0.683136	C: C: Keywords	3	0.031789	0.35422	Fattyacidbiosynthesis
0.0153497	-0.0723475	C: C: GOBP slim name	421	0.0932436	0.358055	cellular component organization
-0.388966	-0.436976	C: C: Keywords	8	0.0298964	0.358757	FAD
-0.00411468	-0.130323	C: C: GOBP slim name	113	0.0923499	0.359416	protein modification process
0.027052	-0.114771	C: C: GOBP slim name	129	0.0914453	0.360771	macromolecule modification
-0.00564428	-0.305311	C: C: KEGG name	37	0.0200184	0.361761	Parkinson's disease
-0.258484	-0.486285	C: C: GOCC slim name	6	0.0885435	0.362224	NADH dehydrogenase complex
-0.0405143	-0.167218	C: C: GOBP slim name	66	0.0883639	0.363554	nucleobase-containing small molecule metabolic process
0.330583	-0.207163	C: C: GOCC name	16	0.0177829	0.363562	nucleoid
0.559267	-0.302714	C: C: GOBP slim name	3	0.0914166	0.365666	xenobiotic metabolic process
-0.0091847	-0.10653	C: C: GOBP slim name	181	0.090645	0.367687	response to stress
-0.0826042	-0.0712115	C: C: GOBP slim name	138	0.0997832	0.36843	signal transduction
0.330583	-0.207163	C: C: GOCC name	16	0.0177829	0.370422	mitochondrial nucleoid
0.195929	-0.21142	C: C: Keywords	25	0.0356459	0.370718	Apoptosis
-0.0189341	-0.499499	C: C: GOCC name	14	0.0184726	0.370795	proteasome complex
-0.0904274	-0.168388	C: C: GOBP slim name	48	0.0993818	0.371714	response to drug
0.0439331	-0.665272	C: C: Keywords	6	0.0365419	0.371774	Celladhesion
0.30848	-0.111139	C: C: GOCC slim name	11	0.0937525	0.372253	cell cortex
-0.0810632	-0.312554	C: C: GOBP slim name	17	0.0986554	0.373852	tRNA aminoacylation for protein translation
-0.0341081	-0.11505	C: C: GOCC slim name	135	0.097603	0.376469	cell projection
-0.247439	-0.414269	C: C: GOCC name	15	0.0177686	0.377241	leading edge membrane
0.0344334	0.0942937	C: C: GOCC name	581	0.019263	0.379757	nuclear part
-0.11031	-0.296085	C: C: GOMF name	58	0.00309433	0.38134	GTPase activity
0.329337	0.251871	C: C: GOCC name	17	0.0198854	0.385149	Cajal body
-0.0280374	-0.237577	C: C: Keywords	49	0.0387867	0.386216	Proteinbiosynthesis
0.866852	0.0693575	C: C: GOCC name	3	0.0221461	0.394343	nuclear nucleosome
0.339248	0.297777	C: C: GOBP slim name	7	0.108183	0.394389	snoRNA processing
0.136142	0.635098	C: C: GOCC slim name	4	0.105311	0.394917	F-actin capping protein complex
0.0989034	-0.145522	C: C: GOBP slim name	41	0.112951	0.396705	alcohol metabolic process
-0.12367	-0.377228	C: C: GOCC name	22	0.0208457	0.396788	contractile fiber part
0.591742	0.846903	C: C: GOCC name	3	0.0212448	0.39753	histone pre-mRNA 3'end processing complex
-0.0974617	-0.249865	C: C: GOCC name	48	0.0220013	0.398188	pigment granule
-0.0079739	-0.255947	C: C: KEGG name	43	0.0362619	0.398881	Huntington's disease
-0.26634	-0.379143	C: C: KEGG name	12	0.0394509	0.399243	Bacterial invasion of epithelial cells
-0.142238	-0.476014	C: C: KEGG name	10	0.0505658	0.399785	Axon guidance
0.000532798	-0.0872668	C: C: GOBP slim name	247	0.112666	0.400589	organelle organization
0.419652	-0.49324	C: C: KEGG name	5	0.0348948	0.40129	Benzoate degradation
-0.148748	-0.0226187	C: C: GOBP slim name	50	0.115726	0.401557	cellular component morphogenesis
0.41547	-0.50662	C: C: KEGG name	5	0.0334072	0.402478	Butanoate metabolism
-0.469708	-0.336699	C: C: GOBP slim name	4	0.111865	0.402715	circulatory system process
-0.0465252	-0.223842	C: C: Keywords	52	0.0430992	0.403408	Chaperone
-0.312369	-0.436214	C: C: KEGG name	9	0.0383997	0.404797	Shigellosis
-0.0974617	-0.249865	C: C: GOCC name	48	0.0220013	0.404825	melanosome
-0.152561	-0.376608	C: C: KEGG name	15	0.0496668	0.405345	Adherens junction
-0.0837989	-0.567563	C: C: Keywords	8	0.042604	0.406912	Porin
-0.11408	-0.3985	C: C: KEGG name	18	0.0290246	0.407957	Endocytosis
0.165455	-0.446154	C: C: KEGG name	10	0.0419551	0.408256	Valine, leucine and isoleucine degradation
0.138807	-0.339696	C: C: KEGG name	15	0.0534847	0.41005	Pyruvate metabolism
-0.0289253	-0.268083	C: C: Keywords	36	0.0447464	0.410614	Ligase
0.536212	-0.40773	C: C: Keywords	4	0.0421822	0.411277	Glucosemetabolism
-0.641383	-0.5254	C: C: Keywords	3	0.0512004	0.413134	GTPaseactivation
-0.0811311	-0.2023	C: C: GOBP slim name	33	0.121082	0.415137	response to extracellular stimulus
0.566272	0.0714983	C: C: Keywords	5	0.054238	0.416121	CF(0)
-0.069296	-0.0955913	C: C: GOBP slim name	110	0.124621	0.417335	regulation of transport
0.16177	-0.36715	C: C: KEGG name	13	0.0478574	0.417515	Calcium signaling pathway
-0.0169659	-0.196691	C: C: GOBP slim name	39	0.126189	0.417729	cofactor metabolic process
-0.0709065	-0.359341	C: C: KEGG name	22	0.0330363	0.417909	Proteasome
-0.22409	-0.354458	C: C: KEGG name	12	0.0644543	0.418127	Pancreatic secretion
0.15721	-0.0965485	C: C: GOCC slim name	30	0.127022	0.418243	chromosome
-0.270186	-0.102384	C: C: GOCC slim name	14	0.117866	0.418735	polysome
0.276642	-0.446516	C: C: KEGG name	7	0.0496528	0.418738	Progesterone-mediated oocyte maturation
-0.0758458	-0.146237	C: C: GOBP slim name	57	0.123591	0.418754	response to external stimulus
-0.0898955	-0.690871	C: C: Keywords	5	0.0511252	0.419765	Calcium/phospholipid-binding
0.0134654	-0.161821	C: C: Keywords	91	0.0538509	0.420037	Transferase
0.193726	-0.444522	C: C: KEGG name	9	0.0464991	0.420152	Fatty acid metabolism
-0.0898955	0.687247	C: C: KEGG name	5	0.0448789	0.420532	Thyroid cancer
0.399349	-0.0715946	C: C: GOCC slim name	6	0.125021	0.421947	PcG protein complex
-0.197221	-0.255176	C: C: KEGG name	21	0.0568325	0.422901	Regulation of actin cytoskeleton
-0.557173	-0.0952049	C: C: GOCC name	7	0.0249413	0.423619	late endosome
0.123953	-0.576816	C: C: GOCC name	8	0.0284148	0.423918	stress fiber
-0.0494629	-0.161028	C: C: GOBP slim name	54	0.12961	0.424177	protein folding
0.0414151	-0.250666	C: C: KEGG name	32	0.0638599	0.425173	Alzheimer's disease
-0.548432	-0.444599	C: C: KEGG name	5	0.0319354	0.425245	Pancreatic cancer
0.0760112	-0.707345	C: C: GOCC name	6	0.0246558	0.425313	nuclear proteasome complex
-0.011242	-0.312192	C: C: KEGG name	21	0.0723152	0.425483	Purine metabolism
0.111888	-0.376194	C: C: GOCC slim name	9	0.116775	0.42607	filopodium
0.0268647	-0.164173	C: C: Keywords	84	0.0537248	0.426156	Cytoskeleton
0.00756175	-0.334186	C: C: GOCC name	26	0.0312861	0.426417	membrane raft
0.141813	-0.237659	C: C: KEGG name	22	0.0692238	0.427161	Glycolysis / Gluconeogenesis
-0.0898955	-0.690871	C: C: Keywords	5	0.0511252	0.42726	Annexin
0.0732993	-0.166639	C: C: GOBP slim name	34	0.149971	0.42764	lipid metabolic process
0.0738098	0.041362	C: C: GOCC slim name	192	0.123641	0.427988	mitochondrion
-0.240585	-0.0923118	C: C: GOCC name	37	0.0244339	0.428175	Golgi membrane
0.164807	-0.525337	C: C: KEGG name	6	0.0711052	0.428324	Glyoxylate and dicarboxylate metabolism
0.451429	-0.290871	C: C: KEGG name	5	0.0678117	0.428909	Various types of N-glycan biosynthesis
0.0547398	-0.160846	C: C: Keywords	77	0.0504961	0.429676	Isopeptidebond
0.123953	-0.576816	C: C: GOCC name	8	0.0284148	0.429725	actomyosin
0.0809488	-0.266565	C: C: KEGG name	26	0.0595227	0.430264	Tight junction
0.824061	-0.573018	C: C: GOCC name	2	0.0312414	0.431131	fatty acid beta-oxidation multienzyme complex
0.248953	-0.237256	C: C: GOBP slim name	8	0.149954	0.431866	protein glycosylation
-0.175243	-0.119658	C: C: GOCC name	56	0.0309756	0.432874	Golgi apparatus part
-0.015438	-0.244352	C: C: KEGG name	34	0.0752872	0.432902	Phagosome
-0.00438584	-0.13514	C: C: GOBP slim name	75	0.149455	0.434777	response to abiotic stimulus
-0.177747	-0.209397	C: C: GOCC name	37	0.0307495	0.435224	endosome
-0.00572236	-0.0754681	C: C: GOBP slim name	294	0.145086	0.435258	establishment of localization
0.0915738	0.857591	C: C: GOCC name	4	0.0303821	0.435608	gap junction
0.123953	-0.576816	C: C: GOCC name	8	0.0284148	0.435693	actin filament bundle
-0.00638106	-0.143057	C: C: GOBP slim name	67	0.148414	0.436155	regulation of organelle organization
-0.394007	-0.502997	C: C: KEGG name	5	0.063807	0.436302	T cell receptor signaling pathway
-0.0395504	-0.118609	C: C: GOCC name	236	0.0280782	0.436597	organelle membrane
-0.164718	-0.357641	C: C: GOCC name	20	0.0276947	0.436785	midbody
0.0233939	-0.602741	C: C: GOCC name	8	0.0296863	0.436983	ruffle
-0.0900209	-0.430565	C: C: GOBP slim name	7	0.147255	0.437211	nucleobase-containing compound catabolic process
-0.08159	-0.632729	C: C: Keywords	6	0.0504674	0.437384	Transmembranebetastrand
-0.0798975	-0.385822	C: C: GOBP slim name	9	0.141266	0.43747	DNA geometric change
0.472056	-0.480976	C: C: GOCC name	5	0.0261627	0.437631	extrinsic to internal side of plasma membrane
-0.177622	-0.52028	C: C: GOCC name	10	0.0302516	0.439445	lipid particle
-0.0125252	-0.0769018	C: C: GOBP slim name	277	0.144985	0.439533	transport
-0.0547465	-0.180108	C: C: Keywords	74	0.0488554	0.439699	Cellmembrane
0.318261	0.523045	C: C: GOCC name	8	0.027559	0.440943	methylosome
-0.0367647	-0.132335	C: C: GOBP slim name	80	0.136398	0.441377	DNA metabolic process
-0.144425	-0.15649	C: C: GOBP slim name	28	0.141107	0.441726	regulation of mitotic cell cycle
0.103887	-0.419556	C: C: Keywords	11	0.0586012	0.442344	Myristate
0.417131	0.339136	C: C: GOBP slim name	4	0.144501	0.442728	mitochondrial translation
-0.00526619	-0.211252	C: C: KEGG name	50	0.063006	0.442792	Protein processing in endoplasmic reticulum
-0.115092	-0.185646	C: C: Keywords	51	0.0504554	0.44553	Glycoprotein
-0.322101	0.168378	C: C: GOBP slim name	7	0.140818	0.445667	multicellular organismal development
0.419344	0.408345	C: C: GOCC name	8	0.0274956	0.446399	SMN-Sm protein complex
-0.181924	-0.345135	C: C: GOBP slim name	9	0.140203	0.448651	regulation of body fluid levels
0.0708569	-0.202684	C: C: GOBP slim name	24	0.159271	0.449706	cellular lipid metabolic process
0.864395	0.771905	C: C: GOCC name	2	0.0273207	0.450179	Barr body
0.325879	-0.180992	C: C: KEGG name	9	0.0875077	0.451825	N-Glycan biosynthesis
0.0308023	-0.162412	C: C: GOCC slim name	44	0.15763	0.452768	centrosome
0.101323	-0.656337	C: C: KEGG name	4	0.0843825	0.454229	One carbon pool by folate
0.211762	-0.519293	C: C: Keywords	6	0.0612375	0.454907	Multifunctionalenzyme
-0.0804073	-0.340063	C: C: KEGG name	16	0.0827395	0.455067	Aminoacyl-tRNA biosynthesis
-0.0390299	-0.125868	C: C: GOBP slim name	76	0.162944	0.455609	heterocycle metabolic process
-0.00811189	-0.358741	C: C: GOCC slim name	10	0.152327	0.456982	ubiquitin ligase complex
-0.608443	0.15704	C: C: KEGG name	3	0.0921412	0.457093	PPAR signaling pathway
-0.595917	-0.421944	C: C: KEGG name	3	0.0813553	0.457398	MAPK signaling pathway - yeast
0.0460251	0.466527	C: C: GOCC slim name	6	0.150066	0.46043	brush border
0.369596	-0.279172	C: C: KEGG name	6	0.087372	0.460523	Long-term depression
0.0353757	-0.272209	C: C: GOCC slim name	16	0.1574	0.461936	site of polarized growth
0.202875	-0.294103	C: C: KEGG name	11	0.0914822	0.4629	Gastric acid secretion
0.0875355	-0.151412	C: C: GOBP slim name	32	0.169174	0.464019	death
-0.41101	-0.20223	C: C: GOCC slim name	5	0.144725	0.465187	endomembrane system
-0.0285625	-0.129811	C: C: Keywords	138	0.0637062	0.465852	Metal-binding
0.0875355	-0.151412	C: C: GOBP slim name	32	0.169174	0.468481	cell death
-0.00181582	-0.0602211	C: C: GOCC slim name	661	0.149623	0.469747	intracellular membrane-bounded organelle
-0.32028	-0.199371	C: C: KEGG name	10	0.0967006	0.470486	Epithelial cell signaling in Helicobacter pylori infection
0.164401	-0.259962	C: C: Keywords	18	0.0658806	0.47434	Lipidmetabolism
-0.269198	-0.314232	C: C: KEGG name	9	0.105083	0.474748	Arrhythmogenic right ventricular cardiomyopathy (ARVC)
-0.297969	-0.142274	C: C: KEGG name	12	0.103308	0.475215	Arginine and proline metabolism
0.519833	-0.3389	C: C: KEGG name	3	0.102203	0.47884	Fatty acid elongation in mitochondria
0.0181607	-0.199717	C: C: GOBP slim name	28	0.176484	0.479505	tRNA metabolic process
0.205382	0.141947	C: C: Keywords	28	0.0703943	0.484479	Activator
0.744375	-0.232197	C: C: GOCC name	3	0.036535	0.485959	pyruvate dehydrogenase complex
-0.0875525	-0.392867	C: C: KEGG name	10	0.113371	0.486151	Methane metabolism
-0.0131688	-0.380622	C: C: KEGG name	11	0.111623	0.486907	Propanoate metabolism
-0.0901468	-0.428372	C: C: KEGG name	9	0.102111	0.487433	Pentose phosphate pathway
-0.0215614	-0.224845	C: C: Keywords	42	0.0698008	0.487564	Mitochondrioninnermembrane
-0.0618108	-0.173464	C: C: GOCC name	88	0.0362364	0.487866	perinuclear region of cytoplasm
-0.0426987	-0.273833	C: C: Keywords	27	0.0741499	0.488763	Ublconjugationpathway
-0.139767	-0.288759	C: C: GOBP slim name	11	0.181954	0.489745	signaling
-0.0592995	-0.125386	C: C: GOBP slim name	60	0.185734	0.490747	cellular homeostasis
-0.215946	0.31311	C: C: GOBP slim name	6	0.184041	0.490776	organelle localization
-0.146099	-0.216312	C: C: Keywords	30	0.0692835	0.491283	Cytoplasmicvesicle
0.637207	0.373695	C: C: Keywords	3	0.0724365	0.491308	Adaptiveimmunity
0.177453	-0.76154	C: C: Keywords	3	0.0740363	0.494986	Cellshape
0.198745	-0.428173	C: C: KEGG name	6	0.111596	0.495329	Amoebiasis
-0.256056	-0.0762676	C: C: Keywords	20	0.0804489	0.495396	Endosome
0.808762	0.142559	C: C: Keywords	2	0.0816337	0.496163	Cyclosporin
0.0401592	-0.0805219	C: C: GOCC name	373	0.0377788	0.496522	nucleus
-0.211471	-0.320252	C: C: Keywords	13	0.0774577	0.496578	Redox-activecenter
-0.0513774	-0.105649	C: C: Keywords	157	0.079906	0.498613	Transport
0.0767944	0.462021	C: C: GOBP slim name	5	0.191215	0.500636	hormone metabolic process
0.466017	-0.510554	C: C: Keywords	3	0.0792116	0.50096	Thiaminepyrophosphate
0.138061	0.122175	C: C: GOCC slim name	30	0.178441	0.501866	preribosome
0.111704	-0.0477323	C: C: Keywords	95	0.077335	0.502677	Methylation
-0.145092	-0.177349	C: C: Keywords	34	0.0850637	0.510382	Signal
-0.0864556	-0.358946	C: C: Keywords	14	0.0861944	0.51062	Stressresponse
0.529477	0.417143	C: C: GOCC name	5	0.0399819	0.513256	pICln-Sm protein complex
-0.0180147	-0.187445	C: C: GOCC name	80	0.0395252	0.513363	mitochondrial membrane
0.268867	-0.356794	C: C: Keywords	7	0.0891336	0.514994	Acyltransferase
-0.144615	-0.287972	C: C: GOBP slim name	10	0.200327	0.519767	cell-cell signaling
-0.140803	-0.773602	C: C: Keywords	3	0.0890027	0.520666	Ubiquinone
-0.0251286	-0.163272	C: C: GOBP slim name	39	0.203058	0.52215	cellular ion homeostasis
0.141082	-0.345135	C: C: KEGG name	9	0.128037	0.531039	Measles
-0.0899582	-0.38424	C: C: GOBP slim name	6	0.228923	0.531693	polysaccharide metabolic process
0.312151	-0.164979	C: C: KEGG name	8	0.12639	0.532944	Melanogenesis
0.902643	0.420723	C: C: GOCC name	2	0.0435799	0.53458	centromeric heterochromatin
-0.0899582	-0.38424	C: C: GOBP slim name	6	0.228923	0.536015	energy reserve metabolic process
0.00878588	-0.204795	C: C: KEGG name	34	0.131476	0.536506	Oxidative phosphorylation
-0.229091	-0.18	C: C: GOBP slim name	10	0.210595	0.536738	cell recognition
0.371334	0.236593	C: C: GOCC name	11	0.0424211	0.538309	small nucleolar ribonucleoprotein complex
-0.14444	-0.247144	C: C: GOCC name	31	0.0448676	0.538411	cytoplasmic vesicle part
0.936022	0.196801	C: C: GOCC name	2	0.0434451	0.538914	pre-snoRNP complex
-0.0897079	-0.674548	C: C: GOBP slim name	2	0.228431	0.539247	drug metabolic process
0.394993	-0.603616	C: C: KEGG name	2	0.147166	0.53961	Phototransduction
-0.199043	-0.260532	C: C: GOCC name	23	0.0430339	0.539879	coated vesicle
-0.11234	-0.0590032	C: C: GOBP slim name	47	0.224997	0.539993	immune system process
0.0397834	-0.187441	C: C: GOBP slim name	24	0.221258	0.540019	cell communication
-0.0899582	-0.644351	C: C: GOCC name	6	0.0462101	0.542723	MCM complex
-0.0954715	-0.262722	C: C: GOBP slim name	12	0.228208	0.543172	exocytosis
0.178987	-0.396095	C: C: KEGG name	6	0.143882	0.543314	Plant-pathogen interaction
-0.139368	-0.0403825	C: C: GOBP slim name	33	0.224572	0.543502	Golgi vesicle transport
0.265136	-0.4238	C: C: GOBP slim name	3	0.220833	0.543588	neurotransmitter metabolic process
0.158984	0.0268344	C: C: KEGG name	37	0.146163	0.543811	Ribosome biogenesis in eukaryotes
0.0523378	-0.588077	C: C: GOCC name	7	0.0448477	0.544087	cytosolic proteasome complex
0.133729	-0.367493	C: C: KEGG name	8	0.135515	0.54421	Carbon fixation in photosynthetic organisms
0.267733	-0.722531	C: C: KEGG name	2	0.140085	0.545252	Two-component system
0.0922244	0.22033	C: C: GOBP slim name	17	0.219852	0.54584	organelle assembly
-0.0221127	-0.219577	C: C: GOBP slim name	20	0.218535	0.547287	regulation of protein stability
-0.121298	-0.216534	C: C: KEGG name	22	0.142955	0.547993	Pathways in cancer
-0.164263	0.00880559	C: C: GOCC name	65	0.0461645	0.548017	Golgi apparatus
0.292802	-0.348707	C: C: GOCC name	9	0.0472236	0.548788	microtubule cytoskeleton
-0.0458957	-0.165279	C: C: GOBP slim name	34	0.217767	0.550147	response to oxidative stress
0.267733	-0.722531	C: C: KEGG name	2	0.140085	0.553772	Synthesis and degradation of ketone bodies
0.105621	0.0940354	C: C: GOBP slim name	39	0.241178	0.555674	nucleobase-containing compound transport
0.27744	-0.449307	C: C: GOCC name	7	0.0485183	0.55796	spindle midzone
-0.219771	-0.0410831	C: C: GOBP slim name	12	0.248329	0.567609	protein acylation
0.196364	-0.134406	C: C: GOBP slim name	10	0.25525	0.578835	tRNA processing
0.264494	-0.143147	C: C: GOCC name	18	0.051644	0.587783	nuclear chromosome
0.269311	0.429831	C: C: GOBP slim name	3	0.262783	0.591262	transcription initiation, DNA-dependent
-0.13463	0.109783	C: C: GOBP slim name	18	0.27164	0.592669	endosome transport
-0.0546657	-0.439067	C: C: GOBP slim name	4	0.268192	0.594149	peptide transport
-0.0897079	0.755216	C: C: KEGG name	2	0.164821	0.595711	Homologous recombination
-0.181268	-0.00469628	C: C: GOBP slim name	16	0.271029	0.59585	cell morphogenesis
-0.112069	-0.0628143	C: C: GOCC slim name	48	0.217217	0.598455	extracellular space
-0.0999304	-0.433148	C: C: GOBP slim name	4	0.268178	0.598724	hormone transport
1	0.961057	C: C: GOMF name	2	0.00870128	0.608619	opsonin binding
0.0141113	-0.049045	C: C: GOBP slim name	1118	0.28214	0.610949	cellular process
-0.0374737	-0.219181	C: C: GOBP slim name	15	0.284414	0.611278	embryo development
0.401441	0.245235	C: C: Keywords	6	0.107535	0.613736	Innateimmunity
0.0802988	-0.417425	C: C: GOCC name	12	0.0546167	0.615274	extrinsic to plasma membrane
0.268468	-0.317715	C: C: Keywords	7	0.109704	0.618573	Carbohydratemetabolism
-0.0518203	-0.379764	C: C: GOMF name	30	0.00909893	0.619685	calcium ion binding
-0.0262823	-0.0480984	C: C: GOCC slim name	1016	0.230087	0.621234	organelle
1	0.961057	C: C: GOMF name	2	0.00870128	0.625525	kininogen binding
-0.458275	-0.261474	C: C: GOBP slim name	2	0.293958	0.627111	glycerol ether metabolic process
0.0544797	0.0109416	C: C: GOBP slim name	177	0.301081	0.632929	macromolecular complex assembly
0.0870883	-0.00344665	C: C: GOBP slim name	63	0.299197	0.633593	chromatin organization
-0.295961	-0.698468	C: C: GOCC name	4	0.0572413	0.638328	sarcomere
0.329387	0.118733	C: C: GOBP slim name	4	0.308287	0.638754	ribosomal subunit export from nucleus
-0.314126	-0.320307	C: C: Keywords	7	0.116045	0.638933	Peroxidase
0.732267	0.130042	C: C: Keywords	2	0.114978	0.640591	Collagen
0.036044	-0.132591	C: C: GOBP slim name	32	0.307145	0.640999	generation of precursor metabolites and energy
0.0643196	-0.0308131	C: C: Keywords	244	0.118094	0.642653	Repeat
1	0.961057	C: C: GOMF name	2	0.00870128	0.643398	hyaluronic acid binding
0.0444336	-0.125799	C: C: GOBP slim name	32	0.313826	0.645584	neurological system process
-0.0774029	-0.421247	C: C: GOMF name	27	0.00573877	0.645737	coenzyme binding
0.0763437	-0.319549	C: C: GOMF name	41	0.0060126	0.648358	receptor binding
0.712459	0.183636	C: C: GOMF name	6	0.00754085	0.650524	protein kinase regulator activity
-0.0312681	-0.166517	C: C: GOMF name	189	0.00653703	0.650686	metal ion binding
0.591278	0.558803	C: C: GOCC name	3	0.0595389	0.650802	U7 snRNP
0.0145198	0.408184	C: C: Keywords	9	0.122562	0.651809	rRNA-binding
-0.161143	-0.426681	C: C: GOCC name	11	0.0592483	0.654101	endoplasmic reticulum-Golgi intermediate compartment
0.288573	0.0540957	C: C: GOMF name	38	0.00734122	0.65514	structure-specific DNA binding
0.215481	-0.786495	C: C: GOMF name	6	0.0078607	0.656241	monocarboxylic acid binding
-0.133231	-0.121243	C: C: GOBP slim name	17	0.321725	0.65714	nucleoside metabolic process
0.0344379	-0.044463	C: C: GOCC slim name	243	0.248321	0.65732	nucleoplasm
-0.297006	0.447772	C: C: Keywords	4	0.126488	0.657739	Spermatogenesis
-0.202994	-0.227602	C: C: Keywords	15	0.122421	0.658542	Electrontransport
-0.145731	-0.0981053	C: C: GOBP slim name	15	0.348516	0.660345	plasma membrane organization
-0.0316716	-0.164985	C: C: GOMF name	190	0.00689027	0.660446	cation binding
-0.0318023	-0.128371	C: C: Keywords	92	0.125707	0.661023	Transmembrane
0.02623	0.0266164	C: C: GOBP slim name	750	0.347248	0.662301	cellular metabolic process
1	0.961057	C: C: GOMF name	2	0.00870128	0.662321	complement component C1q binding
-0.012456	-0.262418	C: C: GOMF name	73	0.00563072	0.662377	oxidoreductase activity
0.034517	0.176719	C: C: GOBP slim name	17	0.357009	0.663346	ribosome biogenesis
-0.178508	-0.148536	C: C: GOBP slim name	9	0.346742	0.665745	protein maturation
0.0636632	-0.0272789	C: C: GOBP slim name	79	0.356155	0.666056	chromosome organization
-0.214834	0.073871	C: C: GOBP slim name	7	0.353915	0.666193	DNA modification
0.633031	0.0893855	C: C: GOMF name	8	0.00644101	0.666773	kinase regulator activity
-0.0897079	0.702364	C: C: KEGG name	2	0.195304	0.667728	Butirosin and neomycin biosynthesis
-0.101932	-0.0853652	C: C: GOBP slim name	28	0.345563	0.667934	membrane invagination
-0.0756252	-0.0456392	C: C: GOBP slim name	65	0.329937	0.669168	localization
-0.130786	-0.0533402	C: C: GOBP slim name	22	0.34197	0.669982	growth
0.362509	-0.00961673	C: C: KEGG name	5	0.214502	0.669987	Olfactory transduction
-0.278552	0.130223	C: C: GOBP slim name	4	0.344598	0.67057	vacuole organization
-0.0320717	-0.163469	C: C: GOMF name	191	0.0072568	0.670735	ion binding
-0.106546	0.340181	C: C: GOBP slim name	4	0.340336	0.671348	cytoplasmic translation
0.362509	0.130314	C: C: KEGG name	5	0.210083	0.672797	ErbB signaling pathway
-0.166014	-0.125315	C: C: GOBP slim name	10	0.369606	0.673712	autophagy
0.0992635	-0.0735761	C: C: GOBP slim name	27	0.336886	0.673772	rhythmic process
-0.124482	-0.068884	C: C: GOBP slim name	23	0.339496	0.674309	vesicle organization
0.0304296	0.0204253	C: C: GOBP slim name	731	0.335382	0.675455	primary metabolic process
-0.337509	-0.440037	C: C: KEGG name	3	0.213681	0.675766	Nitrogen metabolism
0.1891	0.0395651	C: C: KEGG name	21	0.189679	0.675898	Oocyte meiosis
-0.0804073	-0.290818	C: C: Keywords	16	0.134327	0.675966	Aminoacyl-tRNAsynthetase
-0.263617	-0.210719	C: C: KEGG name	8	0.195072	0.676073	Antigen processing and presentation
-0.238746	-0.377282	C: C: KEGG name	5	0.203112	0.676148	Proximal tubule bicarbonate reclamation
0.00979689	-0.177603	C: C: Keywords	45	0.132954	0.67633	Magnesium
-0.0900209	0.233975	C: C: GOBP slim name	7	0.36903	0.676947	interspecies interaction between organisms
-0.176644	-0.285193	C: C: KEGG name	9	0.200749	0.677193	Vascular smooth muscle contraction
-0.324893	-0.437942	C: C: GOCC name	7	0.0626366	0.67795	fascia adherens
-0.193262	0.0947683	C: C: Keywords	21	0.132023	0.678975	Neurogenesis
0.201577	-0.51473	C: C: KEGG name	3	0.193323	0.679317	Biosynthesis of unsaturated fatty acids
0.187456	-0.345505	C: C: KEGG name	5	0.220298	0.6797	Carbon fixation pathways in prokaryotes
0.109288	-0.313024	C: C: KEGG name	8	0.207109	0.680499	Lysine degradation
-0.171439	0.122381	C: C: GOBP slim name	8	0.368621	0.680531	protein alkylation
0.0861853	-0.199094	C: C: KEGG name	18	0.210042	0.681289	ko05152
0.381085	-0.123783	C: C: GOBP slim name	2	0.381157	0.681821	DNA ligation
-0.144047	-0.0549708	C: C: GOBP slim name	15	0.388523	0.682284	cell activation
1	0.961057	C: C: GOMF name	2	0.00870128	0.682391	adrenergic receptor binding
-0.0897079	0.469402	C: C: GOBP slim name	2	0.376887	0.682663	ribosomal large subunit biogenesis
-0.231631	0.0532477	C: C: KEGG name	11	0.224252	0.683564	Protein export
-0.101562	0.00878906	C: C: GOBP slim name	32	0.380079	0.684143	multi-organism process
-0.0897704	0.366736	C: C: GOBP slim name	3	0.387919	0.685402	meiosis
-0.474965	-0.235396	C: C: KEGG name	2	0.285808	0.688662	Toll-like receptor signaling pathway
-0.232218	-0.0395165	C: C: GOBP slim name	6	0.387819	0.689457	endoplasmic reticulum organization
-0.218735	-0.314156	C: C: KEGG name	6	0.228947	0.689568	Colorectal cancer
-0.308148	-0.323468	C: C: KEGG name	4	0.23796	0.691998	mTOR signaling pathway
0.0560205	-0.348907	C: C: KEGG name	6	0.26095	0.69495	beta-Alanine metabolism
-0.474965	-0.235396	C: C: KEGG name	2	0.285808	0.695283	Osteoclast differentiation
-0.202965	0.000500902	C: C: KEGG name	14	0.247518	0.695801	Vibrio cholerae infection
-0.212227	0.374477	C: C: Keywords	6	0.1399	0.696524	Leucine-richrepeat
-0.107229	-0.692057	C: C: GOMF name	9	0.00861634	0.696847	oxidoreductase activity, acting on NADH or NADPH
-0.0901468	-0.283329	C: C: KEGG name	9	0.267277	0.697125	Pyrimidine metabolism
-0.148743	-0.29059	C: C: KEGG name	8	0.245254	0.697182	Fc gamma R-mediated phagocytosis
0.255063	-0.0920042	C: C: KEGG name	8	0.237101	0.697518	Chagas disease (American trypanosomiasis)
0.0167563	-0.202883	C: C: GOCC name	51	0.0664094	0.698247	microtubule
-0.156466	-0.241668	C: C: GOCC name	25	0.067738	0.698904	cytoplasmic vesicle membrane
-0.208275	-0.290214	C: C: KEGG name	6	0.260503	0.70114	Viral myocarditis
0.00718862	-0.220503	C: C: KEGG name	18	0.235791	0.701826	Cell cycle
-0.474965	-0.235396	C: C: KEGG name	2	0.285808	0.702034	Natural killer cell mediated cytotoxicity
0.0984615	-0.253427	C: C: KEGG name	10	0.244285	0.702319	Ubiquitin mediated proteolysis
0.0228648	-0.186441	C: C: GOCC name	59	0.0674605	0.702607	mitochondrial inner membrane
0.0167598	-0.313024	C: C: KEGG name	8	0.258326	0.702757	Tryptophan metabolism
-0.0438719	-0.44046	C: C: KEGG name	4	0.267076	0.703857	Toxoplasmosis
0.0455785	-0.181616	C: C: GOCC name	57	0.0663998	0.70486	microtubule organizing center
0.164927	-0.458594	C: C: KEGG name	3	0.254433	0.707378	Glycine, serine and threonine metabolism
0.0493235	-0.235082	C: C: KEGG name	13	0.257538	0.70823	Meiosis - yeast
-0.0412804	-0.125505	C: C: GOCC name	137	0.0660879	0.70836	cell projection
-0.474965	-0.235396	C: C: KEGG name	2	0.285808	0.708916	Fc epsilon RI signaling pathway
-0.276642	0.247034	C: C: Keywords	7	0.144193	0.710343	Tumorsuppressor
-0.0914046	0.0644587	C: C: Keywords	77	0.14792	0.713677	Coiledcoil
-0.208454	-0.380919	C: C: Keywords	7	0.14665	0.714917	Antioxidant
-0.474965	-0.235396	C: C: KEGG name	2	0.285808	0.715935	B cell receptor signaling pathway
0.148689	-0.438645	C: C: KEGG name	3	0.280705	0.717358	Terpenoid backbone biosynthesis
0.287308	0.0137146	C: C: KEGG name	6	0.284371	0.71946	Glioma
-0.0361325	-0.0831002	C: C: GOCC slim name	98	0.277367	0.720088	neuron projection
-0.090842	-0.164368	C: C: KEGG name	21	0.279252	0.720927	Neurotrophin signaling pathway
-0.0763455	-0.0831062	C: C: GOCC slim name	54	0.283723	0.722692	neuronal cell body
0.0390704	0.0858581	C: C: GOBP slim name	49	0.415086	0.724515	nuclear transport
0.207392	-0.0901468	C: C: GOCC slim name	9	0.297172	0.729422	extracellular region
0.154596	-0.352019	C: C: GOCC slim name	4	0.292226	0.730564	receptor complex
0.16463	-0.0771648	C: C: GOBP slim name	8	0.430073	0.732906	DNA packaging
-0.0384286	-0.0924643	C: C: GOBP slim name	40	0.434174	0.735542	DNA repair
-0.0901468	-0.189844	C: C: GOBP slim name	9	0.429277	0.735904	extracellular structure organization
-0.0960478	-0.180526	C: C: GOBP slim name	9	0.439632	0.736128	response to starvation
-0.145922	-0.0219395	C: C: GOBP slim name	13	0.425777	0.738697	sulfur compound metabolic process
-0.0170473	-0.0807202	C: C: GOBP slim name	59	0.4389	0.739199	protein targeting
0.114	-0.0253246	C: C: GOCC name	106	0.0730671	0.740056	chromosomal part
-0.0901468	-0.189844	C: C: GOBP slim name	9	0.429277	0.740311	extracellular matrix organization
0.389972	-0.477019	C: C: GOCC name	4	0.0737698	0.74038	heterotrimeric G-protein complex
0.0345559	-0.00324536	C: C: GOBP slim name	229	0.458301	0.741521	cellular component assembly
0.0764549	0.0584531	C: C: KEGG name	62	0.310841	0.741914	RNA transport
-0.113152	-0.0430757	C: C: GOBP slim name	19	0.446606	0.743483	translational initiation
0.134951	-0.112168	C: C: GOBP slim name	8	0.458292	0.745695	response to osmotic stress
-0.0993326	-0.138352	C: C: GOCC name	70	0.0729744	0.745961	cell body
-0.0296456	-0.0854002	C: C: GOBP slim name	45	0.456248	0.746587	chromatin modification
0.0436136	-0.187756	C: C: Keywords	31	0.161332	0.747556	Iontransport
0.0167186	-0.0783964	C: C: GOBP slim name	53	0.451834	0.747864	response to DNA damage stimulus
0.211297	-0.173175	C: C: KEGG name	6	0.316405	0.748136	TGF-beta signaling pathway
0.0504417	-0.442352	C: C: Keywords	6	0.159912	0.748388	Myosin
0.179773	-0.230341	C: C: GOBP slim name	3	0.465146	0.748391	meiotic cell cycle
-0.0897079	-0.414465	C: C: GOBP slim name	2	0.454828	0.748518	oligosaccharide metabolic process
-0.307547	-0.421194	C: C: GOCC name	7	0.0754034	0.749958	apical part of cell
-0.15873	-0.370098	C: C: GOCC name	12	0.0812426	0.753713	ruffle membrane
0.233125	0.768499	C: C: GOCC name	3	0.0827994	0.755459	U2-type prespliceosome
-0.116051	-0.0833481	C: C: Keywords	53	0.159882	0.755804	Disulfidebond
0.394993	-0.805981	C: C: GOCC name	2	0.0788093	0.756569	photoreceptor inner segment
-0.0284781	-0.401494	C: C: GOCC name	12	0.0802434	0.757168	organelle envelope lumen
-0.258484	-0.486285	C: C: GOCC name	6	0.0885435	0.757768	respiratory chain complex I
-0.0897704	-0.798191	C: C: GOCC name	3	0.0810629	0.758419	cytoplasmic ubiquitin ligase complex
-0.0899582	0.544863	C: C: GOCC name	6	0.0784272	0.759506	organellar ribosome
0.156216	-0.457681	C: C: GOCC name	7	0.0853374	0.759778	microvillus
0.260967	-0.154748	C: C: Keywords	9	0.165601	0.759817	Sarcoplasmicreticulum
0.310848	-0.837969	C: C: GOCC name	2	0.086852	0.760989	myosin II complex
0.0217023	-0.176553	C: C: KEGG name	17	0.345986	0.76117	Cardiac muscle contraction
0.0148894	-0.2756	C: C: GOCC name	24	0.0862044	0.761357	nuclear matrix
0.233125	0.768499	C: C: GOCC name	3	0.0827994	0.761755	prespliceosome
-0.108706	-0.0887765	C: C: GOCC name	84	0.0898276	0.762844	adherens junction
-0.0897079	-0.7879	C: C: Keywords	2	0.159774	0.763002	Serinebiosynthesis
0.184161	0.149882	C: C: GOCC name	30	0.0801767	0.763061	nucleolar part
-0.0346929	-0.179872	C: C: KEGG name	18	0.335027	0.76362	Cell cycle - yeast
-0.258484	-0.486285	C: C: GOCC name	6	0.0885435	0.763688	NADH dehydrogenase complex
0.0917483	-0.404056	C: C: GOCC name	10	0.0850951	0.76378	filopodium
0.240976	0.198885	C: C: KEGG name	5	0.344275	0.76405	Type II diabetes mellitus
0.173828	-0.0928622	C: C: GOCC name	32	0.090668	0.764103	chromosome
-0.194098	-0.197488	C: C: KEGG name	7	0.332319	0.764334	Cysteine and methionine metabolism
-0.118398	-0.237818	C: C: GOCC name	27	0.0845261	0.764892	vesicle membrane
0.34701	-0.283727	C: C: KEGG name	2	0.341873	0.765433	Caprolactam degradation
-0.0899582	0.544863	C: C: GOCC name	6	0.0784272	0.766227	mitochondrial ribosome
0.30848	-0.111139	C: C: GOCC name	11	0.0937525	0.766687	cell cortex
-0.0635869	-0.167491	C: C: GOCC name	59	0.0917011	0.766955	membrane-enclosed lumen
-0.0763021	-0.248565	C: C: GOCC name	27	0.0947836	0.769419	cytosolic part
-0.258484	-0.486285	C: C: GOCC name	6	0.0885435	0.769701	mitochondrial respiratory chain complex I
0.0103269	-0.360354	C: C: Keywords	9	0.169516	0.770227	Elongationfactor
-0.209034	-0.200711	C: C: GOCC name	21	0.0782001	0.770829	clathrin-coated vesicle
-0.214086	-0.206416	C: C: KEGG name	6	0.332211	0.771095	Alanine, aspartate and glutamate metabolism
-0.0897704	-0.767107	C: C: GOCC name	3	0.0936012	0.771162	acrosomal membrane
0.34701	-0.283727	C: C: KEGG name	2	0.341873	0.772267	Aminobenzoate degradation
-0.0898955	-0.316237	C: C: KEGG name	5	0.360252	0.772404	Salivary secretion
-0.0899582	-0.283821	C: C: KEGG name	6	0.363999	0.773881	Amino sugar and nucleotide sugar metabolism
0.184263	0.00788606	C: C: Keywords	24	0.172115	0.774516	Isomerase
0.120125	-0.339833	C: C: KEGG name	4	0.331246	0.775975	Prostate cancer
0.0339272	-0.155743	C: C: GOCC name	67	0.0935454	0.776497	organelle inner membrane
-0.172607	0.102259	C: C: KEGG name	9	0.359493	0.777365	Hypertrophic cardiomyopathy (HCM)
-0.243763	-0.14453	C: C: KEGG name	5	0.375068	0.777805	Prion diseases
-0.0902729	-0.313951	C: C: Keywords	11	0.17822	0.779503	TPRrepeat
-0.0258713	0.0254152	C: C: GOCC slim name	898	0.323837	0.780679	intracellular organelle
0.0158509	-0.202871	C: C: GOBP slim name	7	0.49086	0.781036	cellular aldehyde metabolic process
0.408901	0.130042	C: C: KEGG name	2	0.373749	0.781476	Leishmaniasis
0.163999	-0.335653	C: C: KEGG name	3	0.371138	0.782482	Phenylalanine metabolism
-0.0724622	-0.073387	C: C: GOBP slim name	26	0.489306	0.78289	endocytosis
-0.0547639	-0.118499	C: C: Keywords	71	0.177546	0.783884	Endoplasmicreticulum
-0.172607	0.102259	C: C: KEGG name	9	0.359493	0.784066	Dilated cardiomyopathy
-0.0897079	0.899861	C: C: GOCC name	2	0.0995459	0.78499	paranode region of axon
-0.105275	-0.295518	C: C: Keywords	12	0.176312	0.785848	Iron
0.546657	-0.648677	C: C: GOMF name	4	0.0134193	0.7893	C-acyltransferase activity
0.013588	-0.43272	C: C: GOCC name	9	0.0987106	0.789685	vesicle coat
-0.0897079	0.899861	C: C: GOCC name	2	0.0995459	0.790638	node of Ranvier
-0.270186	-0.102384	C: C: GOCC name	14	0.117866	0.793441	polysome
0.0768072	0.0988261	C: C: GOCC name	112	0.098655	0.795001	nucleoplasm part
-0.085438	-0.371461	C: C: GOCC name	11	0.116032	0.795649	ubiquitin ligase complex
-0.278205	-0.28232	C: C: GOCC name	9	0.115471	0.79675	transport vesicle
-0.0898329	-0.335306	C: C: KEGG name	4	0.387477	0.797006	Base excision repair
-0.0475526	-0.469445	C: C: GOCC name	7	0.117778	0.797712	signalosome
0.732267	0.130042	C: C: GOCC name	2	0.114978	0.798337	sheet-forming collagen
-0.022897	-0.146651	C: C: GOMF name	202	0.0142032	0.799085	adenyl nucleotide binding
-0.0897079	-0.87274	C: C: GOCC name	2	0.119449	0.799225	ER to Golgi transport vesicle
-0.0109905	-0.0660516	C: C: GOCC name	670	0.112943	0.79929	intracellular membrane-bounded organelle
-0.254965	-0.277483	C: C: GOCC name	10	0.1174	0.800057	cell-cell adherens junction
-0.0897079	-0.915855	C: C: GOCC name	2	0.10224	0.800514	phenylalanine-tRNA ligase complex
0.0839351	-0.384735	C: C: GOCC name	9	0.121158	0.800951	basolateral plasma membrane
-0.0644313	-0.259296	C: C: GOCC name	22	0.120762	0.803141	vacuolar membrane
0.732267	0.130042	C: C: GOCC name	2	0.114978	0.80339	collagen type IV
-0.21738	-0.301928	C: C: GOCC name	11	0.112868	0.803909	actin filament
-0.0897079	-0.895688	C: C: GOCC name	2	0.110029	0.804449	nuclear membrane part
-0.265053	-0.177457	C: C: GOCC name	13	0.112294	0.805015	early endosome
-0.0898955	-0.218397	C: C: GOBP slim name	5	0.509219	0.805798	mitotic cell cycle
0.399349	-0.0715946	C: C: GOCC name	6	0.125021	0.807155	PcG protein complex
0.546657	-0.648677	C: C: GOMF name	4	0.0134193	0.807656	acetyl-CoA C-acyltransferase activity
-0.129511	-0.268654	C: C: GOCC name	17	0.123657	0.807793	intracellular
-0.111638	-0.461185	C: C: Keywords	5	0.186456	0.807975	tRNAprocessing
0.116376	0.541185	C: C: GOCC name	5	0.122954	0.807983	U2-type spliceosomal complex
-0.0897704	-0.38019	C: C: KEGG name	3	0.399404	0.808393	Mineral absorption
-0.0897704	-0.702621	C: C: GOCC name	3	0.124491	0.808459	myelin sheath adaxonal region
0.732267	0.130042	C: C: GOCC name	2	0.114978	0.808507	collagen
0.147747	0.223218	C: C: GOMF name	53	0.0140613	0.808683	mRNA binding
-0.146163	-0.30565	C: C: GOCC name	14	0.112176	0.809429	Z disc
-0.0897079	-0.895688	C: C: GOCC name	2	0.110029	0.809812	intrinsic to nuclear inner membrane
0.222454	-0.0862909	C: C: GOBP slim name	3	0.5239	0.811199	endosome organization
0.136142	0.635098	C: C: GOCC name	4	0.105311	0.813032	F-actin capping protein complex
-0.0203624	-0.164876	C: C: GOMF name	161	0.0125664	0.813044	pyrophosphatase activity
-0.0894419	-0.251879	C: C: GOCC name	23	0.111977	0.813309	pore complex
-0.0277377	-0.0934774	C: C: GOBP slim name	29	0.517028	0.813683	anatomical structure formation involved in morphogenesis
0.0695569	0.0528379	C: C: GOBP slim name	28	0.531349	0.813981	protein phosphorylation
-0.0897079	-0.351182	C: C: GOBP slim name	2	0.523206	0.814505	transcription elongation, DNA-dependent
-0.0897704	-0.38019	C: C: KEGG name	3	0.399404	0.814912	Bile secretion
-0.0897079	-0.895688	C: C: GOCC name	2	0.110029	0.815247	integral to nuclear inner membrane
-0.0897079	-0.353268	C: C: GOBP slim name	2	0.520887	0.815302	protein complex biogenesis
-0.0957065	-0.0943868	C: C: GOCC name	85	0.109342	0.81563	anchoring junction
-0.227564	-0.179778	C: C: GOCC name	17	0.105059	0.816797	stored secretory granule
-0.0195677	-0.138321	C: C: GOBP slim name	13	0.530477	0.816992	cytokinesis
-0.0208756	-0.163083	C: C: GOMF name	162	0.013292	0.819042	hydrolase activity, acting on acid anhydrides
0.13326	-0.0105289	C: C: GOCC name	57	0.127767	0.820083	nuclear chromosome part
0.00613402	-0.420918	C: C: GOCC name	9	0.109244	0.820447	rough endoplasmic reticulum
-0.0897079	-0.900556	C: C: GOCC name	2	0.108107	0.823107	autophagic vacuole membrane
0.276376	-0.77324	C: C: GOMF name	5	0.0130463	0.823506	fatty acid binding
0.013588	-0.21306	C: C: KEGG name	9	0.413777	0.824296	Endocrine and other factor-regulated calcium reabsorption
0.0946502	-0.100551	C: C: GOBP slim name	9	0.543947	0.824509	cell growth
-0.0897079	0.874826	C: C: GOCC name	2	0.109083	0.824845	intercellular canaliculus
0.0226818	0.0688244	C: C: GOBP slim name	47	0.542179	0.826177	nucleocytoplasmic transport
-0.0247183	-0.286796	C: C: GOCC name	20	0.107868	0.826986	extrinsic to membrane
-0.0897079	0.432545	C: C: KEGG name	2	0.412648	0.828571	Drug metabolism - other enzymes
0.0027933	-0.225384	C: C: KEGG name	8	0.41923	0.828634	GnRH signaling pathway
0.108293	-0.50216	C: C: GOCC name	5	0.131464	0.829352	axon terminus
-0.0897079	-0.84701	C: C: GOCC name	2	0.130743	0.829544	VCB complex
0.668014	0.372822	C: C: GOMF name	5	0.0157705	0.832938	protein kinase inhibitor activity
-0.0203624	-0.164876	C: C: GOMF name	161	0.0125664	0.833891	hydrolase activity, acting on acid anhydrides, in phosphorus-containing anhydrides
0.456275	-0.279054	C: C: GOCC name	3	0.157872	0.833925	cortical actin cytoskeleton
-0.0897079	-0.84701	C: C: GOCC name	2	0.130743	0.834339	elongin complex
-0.125845	-0.0533798	C: C: GOCC name	53	0.158908	0.8354	extracellular space
-0.136187	0.0749942	C: C: GOCC slim name	15	0.358944	0.835474	microbody
0.155194	0.10366	C: C: GOCC slim name	13	0.353135	0.836372	proton-transporting two-sector ATPase complex
0.0504417	-0.442352	C: C: GOCC name	6	0.159912	0.836695	myosin complex
0.163711	0.261388	C: C: GOCC name	13	0.15765	0.836758	U12-type spliceosomal complex
0.034567	-0.67074	C: C: GOMF name	8	0.0152268	0.838449	TBP-class protein binding
0.44746	-0.361633	C: C: GOCC name	3	0.134695	0.840133	brush border membrane
-0.0902098	0.324615	C: C: GOCC name	10	0.157633	0.840711	tight junction
0.546741	0.260032	C: C: GOCC name	3	0.134056	0.840894	X chromosome
0.428969	0.253134	C: C: GOCC name	4	0.162594	0.842742	fibrillar center
-0.502782	-0.632823	C: C: GOCC name	2	0.137452	0.843038	peroxisomal matrix
0.427677	-0.531989	C: C: GOCC name	2	0.161943	0.843326	rough endoplasmic reticulum membrane
-0.0656316	-0.24246	C: C: GOCC name	23	0.136037	0.843738	vacuolar part
-0.0902098	0.324615	C: C: GOCC name	10	0.157633	0.844792	occluding junction
-0.0899582	0.1404	C: C: GOBP slim name	6	0.563341	0.845012	peptide metabolic process
0.190443	0.121739	C: C: Keywords	17	0.196944	0.845593	rRNAprocessing
0.0145379	-0.0794661	C: C: GOBP slim name	31	0.561163	0.846152	transmembrane transport
-0.0174482	-0.144862	C: C: GOMF name	199	0.016371	0.847365	adenyl ribonucleotide binding
-0.502782	-0.632823	C: C: GOCC name	2	0.137452	0.847748	microbody lumen
0.0308023	-0.162412	C: C: GOCC name	44	0.15763	0.848896	centrosome
-0.125176	-0.0073449	C: C: GOCC slim name	18	0.42151	0.849311	lysosome
0.0781882	-0.245993	C: C: KEGG name	5	0.439991	0.849755	NOD-like receptor signaling pathway
0.668014	0.372822	C: C: GOMF name	5	0.0157705	0.850291	kinase inhibitor activity
-0.152363	0.0174948	C: C: GOCC slim name	11	0.434733	0.850565	peroxisome
-0.484006	-0.596314	C: C: GOCC name	2	0.157366	0.851629	NURF complex
0.211297	-0.0023245	C: C: GOCC slim name	6	0.429141	0.85197	protein serine/threonine phosphatase complex
0.0818118	-0.245157	C: C: KEGG name	5	0.438013	0.852442	Glycerolipid metabolism
0.304644	-0.15206	C: C: GOCC name	8	0.139822	0.852835	sarcoplasmic reticulum membrane
-0.0914677	-0.129565	C: C: GOCC slim name	16	0.416998	0.85295	nuclear pore
0.193863	-0.0718271	C: C: KEGG name	6	0.434994	0.853128	Glutathione metabolism
-0.123457	-0.070636	C: C: GOCC slim name	18	0.398876	0.854735	chromatin remodeling complex
0.0239879	0.123605	C: C: GOBP slim name	13	0.57282	0.854778	chromosome segregation
-0.484006	-0.596314	C: C: GOCC name	2	0.157366	0.855824	ISWI complex
-0.185185	0.0131221	C: C: GOCC slim name	9	0.393232	0.856232	cilium
0.0763507	-0.248646	C: C: GOCC name	17	0.153603	0.856451	site of polarized growth
0.082664	-0.127687	C: C: Keywords	35	0.20683	0.856607	Microtubule
0.0448499	-0.192243	C: C: GOCC name	31	0.151359	0.856925	outer membrane
0.0809805	-0.124468	C: C: GOCC slim name	17	0.387397	0.857353	kinetochore
0.0683403	-0.391213	C: C: Keywords	6	0.205218	0.857518	Polymorphism
-0.0455588	-0.0668652	C: C: GOCC slim name	67	0.406663	0.857805	endoplasmic reticulum
-0.0897704	-0.64695	C: C: GOCC name	3	0.157005	0.858086	immunological synapse
-0.0213428	-0.221201	C: C: GOCC name	25	0.166479	0.858845	mitochondrial outer membrane
-0.123449	-3.7e-05	C: C: GOCC slim name	19	0.413669	0.859158	vacuole
-0.162698	-0.293184	C: C: GOCC name	12	0.142647	0.860559	secretory granule membrane
0.0763507	-0.248646	C: C: GOCC name	17	0.153603	0.860798	growth cone
0.0459896	-0.0305217	C: C: GOBP slim name	45	0.579904	0.860888	cell proliferation
0.0448499	-0.192243	C: C: GOCC name	31	0.151359	0.861342	organelle outer membrane
0.275382	-0.590403	C: C: Keywords	2	0.204293	0.861342	Growthregulation
-0.0975564	-0.0691103	C: C: GOCC name	78	0.156836	0.861429	focal adhesion
-0.0897079	-0.702364	C: C: Keywords	2	0.209931	0.86182	Irontransport
-0.0898329	0.268454	C: C: GOCC slim name	4	0.447139	0.862339	mRNA cleavage factor complex
-0.0839145	0.421897	C: C: GOCC name	6	0.168044	0.862884	basal plasma membrane
-0.0228386	-0.348305	C: C: GOCC name	11	0.146235	0.863336	mitochondrial intermembrane space
-0.033171	-0.671074	C: C: GOCC name	3	0.142334	0.863388	desmosome
-0.0289533	-0.0565738	C: C: GOCC name	1031	0.169821	0.863972	organelle
0.261603	0.428293	C: C: GOCC name	5	0.153388	0.863979	CRD-mediated mRNA stability complex
-0.0899582	-0.46153	C: C: GOCC name	6	0.151162	0.864679	spindle microtubule
-0.140424	-0.241011	C: C: Keywords	13	0.203378	0.865282	Palmitate
-0.0975564	-0.0691103	C: C: GOCC name	78	0.156836	0.865736	cell-substrate junction
-0.0324211	-0.177731	C: C: GOCC slim name	15	0.384789	0.865775	intracellular
-0.0484092	-0.264936	C: C: GOCC name	19	0.14508	0.865776	cell projection membrane
0.404729	-0.539638	C: C: GOCC name	2	0.169735	0.867537	dendritic branch
-0.427456	-0.0349826	C: C: GOCC name	5	0.146225	0.867916	trans-Golgi network transport vesicle
-0.41101	-0.20223	C: C: GOCC name	5	0.144725	0.868349	endomembrane system
-0.0897079	-0.80459	C: C: GOCC name	2	0.151128	0.868987	flotillin complex
0.0906546	0.336981	C: C: GOCC name	11	0.150392	0.86928	organellar small ribosomal subunit
-0.0975564	-0.0691103	C: C: GOCC name	78	0.156836	0.870086	cell-substrate adherens junction
0.217806	0.137146	C: C: GOCC slim name	6	0.380401	0.870409	extracellular matrix
0.0906546	0.336981	C: C: GOCC name	11	0.150392	0.873855	mitochondrial small ribosomal subunit
0.0680826	-0.0760606	C: C: GOBP slim name	13	0.591966	0.874289	regulation of gene expression, epigenetic
0.0695917	0.0343446	C: C: GOCC name	197	0.149004	0.875	mitochondrion
0.0460251	0.466527	C: C: GOCC name	6	0.150066	0.876576	brush border
0.00289108	-0.0982185	C: C: GOBP slim name	18	0.597854	0.87848	cellular aromatic compound metabolic process
0.0873436	0.00427364	C: C: Keywords	92	0.216546	0.881248	Alternativesplicing
0.118733	-0.129875	C: C: GOBP slim name	4	0.606491	0.882169	post-embryonic development
-0.04368	-0.0155746	C: C: GOBP slim name	59	0.611217	0.884575	cellular localization
0.146834	0.175133	C: C: GOBP slim name	3	0.605698	0.885487	oxidative phosphorylation
-0.0897704	-0.211784	C: C: GOBP slim name	3	0.618038	0.885547	protein catabolic process
0.247108	-0.278885	C: C: Keywords	1435	0.22384	0.887771	Referenceproteome
-0.0903361	-0.139356	C: C: KEGG name	12	0.463921	0.889182	DNA replication
-0.0311273	0.0844529	C: C: GOBP slim name	17	0.617663	0.889435	DNA replication
-0.0220641	-0.0628571	C: C: GOBP slim name	35	0.627022	0.889568	response to biotic stimulus
-0.0897079	0.734006	C: C: GOCC name	2	0.1766	0.890259	WASH complex
-0.0901468	-0.0778787	C: C: GOBP slim name	9	0.630802	0.890543	pigment metabolic process
-0.0679553	-0.0311755	C: C: GOBP slim name	21	0.626039	0.89257	one-carbon metabolic process
-0.0899582	-0.433984	C: C: GOCC name	6	0.176278	0.892708	COPI vesicle coat
-0.0582627	-0.185499	C: C: Keywords	24	0.238627	0.893419	DNArepair
0.290682	-0.515994	C: C: Keywords	2	0.240741	0.894182	Inflammatoryresponse
0.0910489	-0.0335664	C: C: GOBP slim name	10	0.636693	0.894476	protein dephosphorylation
-0.300105	-0.14595	C: C: GOCC name	8	0.179081	0.894595	phagocytic vesicle membrane
0.247108	-0.278885	C: C: Keywords	1435	0.22384	0.895359	Completeproteome
0.138061	0.122175	C: C: GOCC name	30	0.178441	0.89545	preribosome
0.206878	-0.195007	C: C: Keywords	8	0.233722	0.896574	Potassium
-0.331472	-0.0860333	C: C: GOCC name	7	0.180649	0.898364	Golgi-associated vesicle
0.084491	0.140337	C: C: Keywords	33	0.236431	0.899592	Repressor
0.27898	0.0998603	C: C: Keywords	8	0.223053	0.899905	Immunity
-0.104895	-0.276224	C: C: Keywords	10	0.244287	0.900207	Respiratorychain
-0.0582627	-0.185499	C: C: Keywords	24	0.238627	0.900624	DNAdamage
0.293191	-0.0194397	C: C: Keywords	7	0.233012	0.901236	Dynein
0.0818754	-0.247789	C: C: Keywords	11	0.246528	0.901368	Lipidbiosynthesis
0.240547	-0.502204	C: C: GOCC name	3	0.183023	0.902044	preribosome, large subunit precursor
-0.250233	-0.0790149	C: C: GOCC name	12	0.183858	0.902128	smooth endoplasmic reticulum
-0.0117026	-0.0552324	C: C: GOCC name	815	0.185093	0.904172	cytoplasmic part
0.240547	-0.502204	C: C: GOCC name	3	0.183023	0.906089	PeBoW complex
-0.0898329	0.130223	C: C: GOBP slim name	4	0.65192	0.90702	lipid transport
0.174366	0.0566901	C: C: Keywords	20	0.232713	0.90758	Ribosomebiogenesis
0.103078	0.192896	C: C: Keywords	19	0.231094	0.908841	Translationregulation
0.0366073	-0.0534043	C: C: GOBP slim name	22	0.66721	0.910694	cell cycle
-0.0898329	0.130223	C: C: GOBP slim name	4	0.65192	0.911423	cellular metabolic compound salvage
0.0436709	-0.0193986	C: C: GOBP slim name	37	0.658573	0.911871	peptidyl-amino acid modification
-0.0857636	-0.127486	C: C: KEGG name	13	0.479639	0.912397	Insulin signaling pathway
0.739736	-0.500812	C: C: GOMF name	3	0.0186928	0.912772	antigen binding
-0.0427196	-0.116581	C: C: GOCC slim name	21	0.480469	0.913568	nuclear envelope
0.0283977	-0.0775205	C: C: GOBP slim name	15	0.667061	0.914826	membrane fusion
0.498492	0.0795639	C: C: GOCC name	3	0.189338	0.916793	90S preribosome
-0.0053313	-0.0678381	C: C: GOBP slim name	26	0.665593	0.917181	behavior
-0.16652	-0.186534	C: C: GOCC name	16	0.191137	0.917458	endoplasmic reticulum lumen
0.0845993	-0.0924042	C: C: GOBP slim name	5	0.681882	0.917674	organic acid transport
0.0985376	0.515669	C: C: GOCC name	4	0.190386	0.917845	initial segment
-0.028441	-0.469716	C: C: GOMF name	16	0.0180913	0.918047	NAD binding
0.148225	-0.0410578	C: C: GOBP slim name	3	0.680589	0.920233	amine transport
-0.0601133	-0.235564	C: C: GOCC name	19	0.18922	0.920259	lysosomal membrane
-0.0897704	-0.295755	C: C: GOCC slim name	3	0.504947	0.921187	condensin complex
-0.0884385	0.0120351	C: C: GOBP slim name	9	0.680494	0.924445	membrane docking
-0.0367399	-0.287909	C: C: GOMF name	43	0.0185911	0.925265	ligase activity
-0.0898955	0.187735	C: C: GOCC slim name	5	0.521111	0.925658	signal recognition particle
0.305285	-0.585535	C: C: GOCC name	2	0.193891	0.926647	zymogen granule
-0.0160854	-0.142102	C: C: GOMF name	196	0.0193475	0.927245	ATP binding
0.127295	0.159958	C: C: GOCC name	24	0.196618	0.927633	methyltransferase complex
-0.0897079	-0.345619	C: C: GOCC slim name	2	0.52941	0.928186	nucleotide-excision repair complex
0.0753138	-0.397025	C: C: GOCC name	6	0.196131	0.929309	neuron projection terminus
-0.0181309	-0.155671	C: C: GOCC slim name	11	0.5164	0.92952	transcription factor complex
0.0545361	0.00123264	C: C: GOCC slim name	68	0.502853	0.929934	cytoskeleton
-0.122911	-0.0567549	C: C: GOBP slim name	4	0.698607	0.931476	ribosomal small subunit biogenesis
-0.0897704	0.130132	C: C: GOBP slim name	3	0.696156	0.932526	purine-containing compound salvage
0.931154	0.772601	C: C: GOMF name	2	0.020188	0.932973	histone pre-mRNA DCP binding
0.0209796	-0.0675913	C: C: GOBP slim name	16	0.706424	0.933257	organelle fusion
-0.0148588	-0.109118	C: C: GOCC name	94	0.196122	0.933272	integral to membrane
0.0264772	0.0983772	C: C: GOBP slim name	9	0.704195	0.9346	microtubule organizing center organization
0.230341	-0.085595	C: C: KEGG name	3	0.511356	0.937486	Metabolism of xenobiotics by cytochrome P450
0.136173	0.107542	C: C: KEGG name	8	0.505019	0.939484	Hepatitis C
0.110201	0.0620587	C: C: GOCC name	53	0.20277	0.94058	chromatin
-0.0714422	0.12628	C: C: GOCC slim name	11	0.501688	0.940666	transcriptional repressor complex
-0.0435727	-0.11108	C: C: GOCC name	77	0.20238	0.942731	cell projection part
0.135093	0.0800561	C: C: GOCC name	34	0.204329	0.943845	nuclear chromatin
0.230341	-0.085595	C: C: KEGG name	3	0.511356	0.944329	Drug metabolism - cytochrome P450
-0.0897079	-0.368567	C: C: KEGG name	2	0.504007	0.944547	Cytosolic DNA-sensing pathway
-0.0964485	-0.0954039	C: C: GOBP slim name	4	0.718618	0.945031	cellular respiration
-0.108376	0.186357	C: C: GOCC name	18	0.201302	0.945692	stress granule
-0.0220387	-0.105158	C: C: GOCC name	97	0.202173	0.945759	endoplasmic reticulum part
-0.292131	0.317897	C: C: GOCC name	4	0.205788	0.946625	dynactin complex
-0.0182544	-0.155334	C: C: GOMF name	157	0.0201266	0.947047	nucleoside-triphosphatase activity
-0.0898955	-0.074007	C: C: GOBP slim name	5	0.724535	0.948483	developmental maturation
0.0186802	-0.0831006	C: C: GOBP slim name	8	0.751852	0.949708	neurotransmitter transport
-0.0900209	-0.163194	C: C: KEGG name	7	0.533489	0.950512	Nucleotide excision repair
-0.0898329	-0.252786	C: C: KEGG name	4	0.503507	0.950652	Aldosterone-regulated sodium reabsorption
-0.0897079	0.130042	C: C: GOBP slim name	2	0.749928	0.951451	transcription from RNA polymerase III promoter
-0.0165706	-0.104105	C: C: GOCC name	96	0.212106	0.951889	intrinsic to membrane
-0.0897079	-0.344228	C: C: KEGG name	2	0.530965	0.952724	Arachidonic acid metabolism
0.080738	0.02201	C: C: Keywords	85	0.26874	0.952805	Transitpeptide
0.201646	-0.138908	C: C: Keywords	9	0.266745	0.952953	S-nitrosylation
-0.0898955	0.186063	C: C: KEGG name	5	0.523819	0.953426	Apoptosis
0.143802	-0.161212	C: C: KEGG name	4	0.528033	0.954231	Valine, leucine and isoleucine biosynthesis
0.32357	0.155044	C: C: GOCC name	6	0.210113	0.954585	proton-transporting ATP synthase complex, coupling factor F(o)
0.154257	-0.429831	C: C: Keywords	3	0.28567	0.954955	DNArecombination
-0.243082	0.0294548	C: C: GOCC name	11	0.211985	0.95523	recycling endosome membrane
-0.213438	0.178148	C: C: Keywords	7	0.27152	0.955423	RNA-mediatedgenesilencing
0.233125	0.526328	C: C: GOCC name	3	0.211196	0.955573	U2 snRNP
-0.0897079	0.130042	C: C: GOBP slim name	2	0.749928	0.955661	transcription from RNA polymerase I promoter
0.146664	-0.124023	C: C: Keywords	14	0.284319	0.957274	Glycolysis
0.32357	0.155044	C: C: GOCC name	6	0.210113	0.95853	mitochondrial proton-transporting ATP synthase complex, coupling factor F(o)
-0.000211268	0.198099	C: C: Keywords	20	0.264237	0.958627	Developmentalprotein
-0.0897079	-0.334492	C: C: KEGG name	2	0.541897	0.958741	Thiamine metabolism
-0.0897079	-0.323366	C: C: GOCC slim name	2	0.554485	0.959686	mismatch repair complex
-0.0897079	0.130042	C: C: GOBP slim name	2	0.749928	0.959908	secondary metabolic process
-0.295961	-0.269847	C: C: Keywords	4	0.283078	0.960003	Synaptosome
-0.0898329	-0.0619777	C: C: GOBP slim name	4	0.763386	0.960067	telomere organization
-0.240976	-0.296446	C: C: Keywords	5	0.266719	0.96019	Autophagy
0.397079	0.563282	C: C: GOCC name	2	0.210017	0.962068	cytosolic ribosome
-0.0897079	0.130042	C: C: GOBP slim name	2	0.749928	0.964193	protein lipidation
-0.0900838	-0.291899	C: C: Keywords	8	0.282499	0.965035	Amino-acidbiosynthesis
0.0232353	-0.0906158	C: C: Keywords	80	0.281344	0.968154	3D-structure
-0.0897079	0.130042	C: C: GOBP slim name	2	0.749928	0.968517	cellular alkene metabolic process
-0.271061	-0.022129	C: C: GOCC name	9	0.217177	0.9707	recycling endosome
0.0455104	-0.0416464	C: C: Keywords	146	0.292981	0.972448	Mitochondrion
-0.0897079	0.130042	C: C: GOBP slim name	2	0.749928	0.97288	cell maturation
-0.384829	-0.225238	C: C: Keywords	3	0.278644	0.973173	Aminotransferase
0.147298	-0.439109	C: C: Keywords	3	0.281037	0.974261	2Fe-2S
-0.156621	-0.0202916	C: C: GOCC name	26	0.228696	0.974826	axon part
-0.221525	0.252208	C: C: GOCC name	6	0.230518	0.975063	RNA cap binding complex
-0.305353	-0.0132589	C: C: GOCC name	7	0.219047	0.975112	endoplasmic reticulum-Golgi intermediate compartment membrane
0.024344	-0.00638662	C: C: GOBP slim name	54	0.778969	0.975405	phosphorus metabolic process
-0.187675	0.226082	C: C: GOCC name	8	0.228273	0.976796	coated pit
0.413769	-0.395688	C: C: GOCC name	2	0.230077	0.976942	nuclear replication fork
-0.0897079	0.130042	C: C: GOBP slim name	2	0.749928	0.977282	amino acid transport
-0.252867	-0.0632168	C: C: GOCC name	10	0.223151	0.977613	cilium
-0.057295	-0.125755	C: C: GOCC name	50	0.227754	0.978366	organelle lumen
-0.247666	0.276376	C: C: GOCC name	5	0.225245	0.979016	mRNA cap binding complex
0.315435	-0.0664807	C: C: GOCC name	6	0.22277	0.979835	nuclear outer membrane
-0.0226838	-0.0934375	C: C: Keywords	80	0.297359	0.980029	Transmembranehelix
-0.456885	0.338665	C: C: GOCC name	2	0.224755	0.98075	ER-mitochondrion membrane contact site
0.202863	-0.212814	C: C: GOCC name	8	0.222221	0.98133	nuclear euchromatin
0.0336941	-0.0593575	C: C: GOBP slim name	8	0.787282	0.981546	muscle contraction
-0.057295	-0.125755	C: C: GOCC name	50	0.227754	0.982188	intracellular organelle lumen
-0.0899582	-0.13947	C: C: GOCC slim name	6	0.604191	0.982721	RNAi effector complex
0.0718271	0.393538	C: C: GOCC name	6	0.221926	0.983961	U4/U6 x U5 tri-snRNP complex
0.118039	0.152834	C: C: GOCC name	23	0.233571	0.984209	small-subunit processome
0.0306558	-0.12319	C: C: Keywords	39	0.300916	0.984816	Cellcycle
-0.363953	0.286708	C: C: GOCC name	3	0.227743	0.985994	early endosome membrane
-0.0897079	-0.317107	C: C: KEGG name	2	0.561607	0.986713	p53 signaling pathway
-0.199626	-0.0501053	C: C: GOCC name	15	0.23967	0.987296	trans-Golgi network
-0.387149	-0.0415217	C: C: Keywords	3	0.308267	0.988143	Symport
-0.0849582	-0.0177577	C: C: GOBP slim name	4	0.796041	0.988188	protein depolymerization
-0.164648	0.0380282	C: C: GOCC name	20	0.245493	0.989138	endosome membrane
-0.0897079	-0.102921	C: C: GOBP slim name	2	0.800434	0.989377	vacuolar transport
-0.0897704	-0.208072	C: C: GOCC slim name	3	0.623092	0.989616	Sec61 translocon complex
-0.373231	0.0879146	C: C: Keywords	3	0.304594	0.989929	Exonuclease
-0.0897704	-0.536534	C: C: GOCC name	3	0.239421	0.989966	nuclear lamina
-0.509736	-0.294159	C: C: GOCC name	2	0.242179	0.990242	perichromatin fibrils
0.124036	0.22236	C: C: GOCC name	13	0.24682	0.990871	heterochromatin
-0.0183818	-0.260094	C: C: GOCC name	13	0.238778	0.991017	membrane coat
0.0564816	-0.374215	C: C: GOMF name	22	0.021833	0.991296	transcription factor binding
-0.0897704	-0.23962	C: C: GOCC slim name	3	0.580123	0.99135	DNA helicase complex
-0.0898955	-0.410732	C: C: GOCC name	5	0.241647	0.99174	integral to plasma membrane
-0.520862	-0.282337	C: C: GOCC name	2	0.236388	0.992291	zymogen granule membrane
-0.164648	0.0380282	C: C: GOCC name	20	0.245493	0.992762	endosomal part
-0.00963958	-0.160933	C: C: Keywords	25	0.314055	0.993093	Initiationfactor
-0.274721	-0.267061	C: C: Keywords	4	0.307774	0.993366	Oxidation
0.151937	0.170958	C: C: GOCC slim name	3	0.603414	0.993425	transcription export complex
-0.44854	0.111266	C: C: Keywords	2	0.312165	0.993833	Chromosomepartition
0.387883	0.0508357	C: C: GOCC name	4	0.238671	0.994311	ESC/E(Z) complex
-0.140772	-0.274633	C: C: GOCC name	9	0.244112	0.994463	mitotic spindle
-0.515299	0.130042	C: C: GOCC name	2	0.245026	0.994516	insulin-responsive compartment
0.00503259	-0.0164028	C: C: GOBP slim name	117	0.812007	0.99514	cell differentiation
-0.182079	0.124156	C: C: Keywords	9	0.317319	0.996678	Postsynapticcellmembrane
-0.0897704	-0.209928	C: C: GOCC slim name	3	0.620565	0.997337	AP-type membrane coat adaptor complex
0.19461	0.0144838	C: C: GOCC name	16	0.238528	0.99748	condensed chromosome
0.0392971	-0.0177349	C: C: GOBP slim name	13	0.811699	0.999014	DNA recombination
0	0	C: C: GOMF name	0	1	1	zinc ion transmembrane transporter activity
0	0	C: C: GOBP slim name	0	1	1	xenobiotic transport
0	0	C: C: GOCC slim name	0	1	1	voltage-gated calcium channel complex
0	0	C: C: KEGG name	0	1	1	Vitamin digestion and absorption
0	0	C: C: Keywords	0	1	1	Zinctransport
0	0	C: C: GOCC name	1	1	1	Y chromosome
